# Supplementary material for: Nurture trumps nature in a longitudinal survey of salivary bacterial communities in twins from early adolescence to early adulthood
Source: HighWire-hosted journal article supplement (doi:10.1101/gr.140608.112), 2012-10-12
Supplement: Stahringer_table_S2.xlsx [file Stahringer_table_S2.xlsx]

## Sheet: Table
Taxon	S00008	S00016	S00021	S00036	S00041	S00047	S00049	S00054	S00055	S00070	S00074	S00083	S00086	S00102	S00104	S00106	S00108	S00109	S00112	S00113	S00121	S00123	S00131	S00132	S00145	S00146	S00167	S00173	S00178	S00180	S00181	S00186	S00221	S00223	S00240	S00250	S00305	S00308	S00329	S00330	S00343	S00345	S00358	S00413	S00415	S00429	S00430	S00530	S00532
Bacteria;Actinobacteria;Actinobacteria;Actinomycetales;Actinomycetaceae;Actinomyces	0.0159547	0.0568889	0.0026362	0.000865801	0.00124069	0.00232288	0.00375235	0.00443459	0.00309598	0.00137931	0.0055788	0.0105023	0.0152905	0.0230326	0.00880162	0.0137165	0.000600601	0.00795107	0.00309598	0.0114094	0.00218023	0.00157853	0.00190114	0.00200803	0	0.00392773	0.00126156	0.0424093	0.032386	0.00124766	0.00301545	0.020214	0.00353107	0.00362319	0.00788288	0.00610329	0.031052	0.0128814	0.00542215	0.00652174	0.000405351	0	0.000649773	0.00925267	0.00353774	0.00889121	0.00505051	0.00144718	0.0065407
Bacteria;Actinobacteria;Actinobacteria;Actinomycetales;Corynebacteriaceae;Corynebacterium	0.000514668	0	0	0.000865801	0.000620347	0	0	0.00665188	0	0.00137931	0.0055788	0.000456621	0.00152905	0	0.000677048	0	0.0018018	0.0030581	0.00185759	0.0375839	0.00290698	0.00157853	0	0	0.00115274	0.00157109	0	0.00307314	0.00264375	0	0.000376932	0.00356718	0	0.00422705	0	0.000469484	0	0.00135593	0.000774593	0.00362319	0	0.00297915	0	0	0	0.000523013	0.000561167	0	0
Bacteria;Actinobacteria;Actinobacteria;Actinomycetales;Micrococcaceae;Rothia	0.0710242	0.0195556	0.0237258	0.0528139	0.0117866	0.00174216	0.054409	0.0561715	0.0513932	0.000689655	0.00627615	0.000456621	0.0254842	0.129367	0.0616114	0.0163292	0.0036036	0.0201835	0.0402477	0.0503356	0.00872093	0.0110497	0.00633714	0.00200803	0.00576369	0.0298507	0.0336417	0.258144	0.330469	0.00249532	0.00452318	0.0178359	0.00847458	0.00785024	0.0118243	0.043662	0.144487	0.0413559	0.00774593	0.0768116	0.0470207	0.0347567	0.00194932	0.0206406	0.0123821	0.154812	0.0117845	0.0166425	0.0792151
Bacteria;Actinobacteria;Actinobacteria;Actinomycetales;Propionibacteriaceae;Propionibacterium	0	0	0	0	0	0	0	0	0	0	0	0	0	0	0	0	0	0	0	0	0	0	0	0	0	0	0	0	0	0.00062383	0.000376932	0	0	0	0	0	0	0	0	0	0	0	0	0	0	0	0	0	0.00508721
Bacteria;Actinobacteria;Actinobacteria;Coriobacteriales;Coriobacteriaceae;Atopobium	0.00102934	0.0453333	0	0.000865801	0.00310174	0	0.00187617	0	0	0	0	0	0.00458716	0.00345489	0.0013541	0.00914435	0	0	0	0	0	0	0	0	0	0	0	0	0	0	0.000376932	0	0.000706215	0	0.000563063	0	0.0095057	0	0	0	0	0	0	0	0.000589623	0.000523013	0.000561167	0	0
Bacteria;Actinobacteria;Actinobacteria;Coriobacteriales;Coriobacteriaceae;Cryptobacterium	0	0.000888889	0	0	0	0	0	0	0	0	0	0	0	0	0	0	0	0	0	0	0	0	0	0	0	0	0	0	0	0	0	0	0	0	0	0	0	0	0	0	0	0	0	0	0	0	0	0	0
Bacteria;Actinobacteria;Actinobacteria;Coriobacteriales;Coriobacteriaceae;Olsenella	0	0	0	0	0	0	0	0	0	0	0	0	0	0	0	0	0	0	0	0	0	0	0	0	0	0	0	0	0	0	0	0	0	0	0	0	0	0	0	0	0	0	0	0	0	0	0	0	0
Bacteria;Bacteroidetes;Bacteroidia;Bacteroidales;Porphyromonadaceae;Porphyromonas	0.0113227	0.00622222	0.00615114	0.000865801	0.0124069	0.0627178	0	0.00960828	0.00123839	0.00482759	0.00488145	0.00684932	0.00254842	0.00307102	0	0.000653168	0.0186186	0.00428135	0.000619195	0.00402685	0.0123547	0.00394633	0.000633714	0.00200803	0.0340058	0.00314218	0.000420521	0.000614628	0	0.00124766	0.00791557	0.0196195	0.000706215	0.00603865	0.0123874	0.00375587	0.00190114	0.0108475	0.00852053	0.00144928	0	0.000993049	0.000649773	0	0.00117925	0.0203975	0.00617284	0	0.0232558
Bacteria;Bacteroidetes;Bacteroidia;Bacteroidales;Porphyromonadaceae;Tannerella	0.000514668	0.000888889	0	0	0	0.00058072	0	0	0	0	0.00069735	0	0	0.000383877	0.000677048	0	0.000600601	0	0	0.000671141	0	0	0	0	0	0	0	0	0	0	0	0	0	0	0	0	0	0	0	0	0	0	0	0.000711744	0	0.000523013	0.00112233	0	0
Bacteria;Bacteroidetes;Bacteroidia;Bacteroidales;Prevotellaceae;Hallella	0	0	0	0	0	0	0	0	0	0	0	0	0	0	0	0	0	0	0	0	0	0	0	0	0	0	0	0	0	0	0	0	0	0	0	0	0	0	0	0	0	0	0	0	0	0	0	0	0
Bacteria;Bacteroidetes;Bacteroidia;Bacteroidales;Prevotellaceae;Prevotella	0.0283067	0.326222	0.00351494	0.004329	0.073201	0.0278746	0.0331457	0.0155211	0.0148607	0.000689655	0.00209205	0.00776256	0.0647299	0.196545	0.382532	0.468321	0.003003	0.00489297	0.000619195	0.00134228	0.00726744	0.00157853	0.00126743	0.00200803	0.00288184	0.00392773	0.00336417	0.00983405	0.0779907	0.0174672	0.00263852	0.00356718	0.00211864	0	0.0641892	0.00328638	0.0754119	0.170169	0.0123935	0.0108696	0	0.00430321	0.000649773	0.00284698	0.00117925	0.280858	0.29798	0	0.0101744
Bacteria;Bacteroidetes;Flavobacteria;Flavobacteriales;Flavobacteriaceae;Capnocytophaga	0	0.00266667	0.0026362	0.0025974	0.000620347	0.0029036	0.00250156	0.0014782	0.00247678	0.00275862	0	0.0315068	0.0030581	0.000383877	0.0013541	0.000653168	0.0012012	0.00122324	0.000619195	0.00872483	0.000726744	0.0023678	0.000633714	0.00100402	0.00172911	0	0	0.00245851	0	0.00062383	0.0011308	0.00059453	0.000706215	0.00181159	0.00112613	0.000469484	0	0.0271186	0.0131681	0.0108696	0.000405351	0	0	0.000711744	0.000589623	0.000523013	0	0	0.00436047
Bacteria;Cyanobacteria;Cyanobacteria;Chloroplast;Streptophyta	0	0.0151111	0	0	0.000620347	0	0	0	0	0	0	0	0	0	0	0	0	0	0	0	0	0	0	0	0	0.000785546	0	0	0	0	0	0	0	0	0	0	0	0.000677966	0	0	0	0	0	0	0	0	0	0	0
Bacteria;Firmicutes;Bacilli;Bacillales;Staphylococcaceae;Gemella	0.0555841	0.00444444	0.0474517	0.0285714	0.0372208	0.0116144	0.0137586	0.00813008	0.0216718	0.0331034	0.0571827	0.00136986	0.00866463	0.00537428	0.00203114	0.00391901	0.015015	0.0030581	0.00990712	0.0194631	0.0777616	0.0149961	0.0982256	0.0381526	0.0322767	0.0981932	0.0710681	0.00553165	0.00462657	0.0062383	0.00339239	0.0118906	0.0162429	0.013285	0.00675676	0.0441315	0.0107731	0.040678	0.0426026	0.0398551	0.00283745	0.0129096	0.0155945	0.111744	0.0241745	0	0.003367	0.0607815	0.0130814
Bacteria;Firmicutes;Bacilli;Bacillales;Staphylococcaceae;Staphylococcus	0	0	0	0	0	0	0	0	0	0	0	0	0	0	0	0	0	0	0	0	0	0	0	0	0	0	0	0	0	0	0	0	0	0	0	0	0	0	0	0	0	0	0	0	0	0	0	0	0.000726744
Bacteria;Firmicutes;Bacilli;Lactobacillales;Aerococcaceae;Abiotrophia	0.0133814	0	0.013181	0.00606061	0.000620347	0.00464576	0.0100063	0.00221729	0.00928793	0.00482759	0.0013947	0.000913242	0.00254842	0.000383877	0.000677048	0	0	0.000611621	0	0.00201342	0.00218023	0.00157853	0.00506971	0.00903614	0.00172911	0.000785546	0.00168209	0.00122926	0	0.00249532	0.0011308	0.00178359	0	0.000603865	0.0259009	0.00234742	0.00380228	0.0115254	0.00852053	0.00217391	0	0.000993049	0	0.00854093	0.00412736	0.00156904	0.00112233	0.000723589	0.0188953
Bacteria;Firmicutes;Bacilli;Lactobacillales;Carnobacteriaceae;Granulicatella	0.0566135	0.00533333	0.0413005	0.0225108	0.0192308	0.142276	0.0100063	0.0406504	0.0117647	0.0689655	0.0767085	0.0438356	0.0234455	0.0756238	0.00406229	0.0150229	0.106306	0.0379205	0.0526316	0.0328859	0.0922965	0.0276243	0.00760456	0.00803213	0.0939481	0.0102121	0.0147183	0.00983405	0.0508923	0.00187149	0.00490011	0.0386445	0.000706215	0.0609903	0.0433559	0.0600939	0.0614702	0.0223729	0.0549961	0.0289855	0.069315	0.00993049	0.00519818	0.00640569	0.0613208	0.0706067	0.0409652	0.00361795	0.0181686
Bacteria;Firmicutes;Bacilli;Lactobacillales;Lactobacillaceae;Lactobacillus	0	0.0195556	0	0	0	0	0	0	0	0	0	0	0	0.000767754	0	0	0	0	0	0	0	0	0	0	0	0.000785546	0	0	0	0	0	0	0	0	0	0	0	0.00135593	0	0	0	0	0	0	0	0	0	0	0
Bacteria;Firmicutes;Bacilli;Lactobacillales;Streptococcaceae;Lactococcus	0	0	0	0	0.000620347	0	0	0	0	0	0	0.000456621	0	0	0	0	0	0	0	0	0	0	0	0	0	0.00157109	0	0	0	0	0	0	0	0	0	0	0	0	0	0	0	0	0	0	0	0	0	0	0
Bacteria;Firmicutes;Bacilli;Lactobacillales;Streptococcaceae;Streptococcus	0.5965	0.165333	0.561511	0.408658	0.49938	0.383856	0.596623	0.492979	0.741176	0.581379	0.560669	0.43242	0.19317	0.156238	0.167231	0.136512	0.35976	0.708869	0.628483	0.649664	0.585029	0.673244	0.494297	0.655622	0.539481	0.695994	0.791842	0.490473	0.338401	0.805365	0.661892	0.555886	0.510593	0.658816	0.627252	0.362911	0.455006	0.271864	0.41828	0.510145	0.546413	0.877524	0.744639	0.496085	0.505896	0.109833	0.372615	0.762663	0.22311
Bacteria;Firmicutes;Clostridia;Clostridiales;Eubacteriaceae;Eubacterium	0	0	0	0	0	0.00058072	0	0	0	0	0	0	0	0	0	0.00261267	0	0	0	0	0	0.000789266	0	0	0	0	0	0	0	0	0	0	0	0	0	0	0	0	0	0	0	0	0	0	0	0.000523013	0	0	0
Bacteria;Firmicutes;Clostridia;Clostridiales;Incertae Sedis XI;Parvimonas	0.000514668	0	0	0	0	0	0	0	0.000619195	0	0	0	0	0	0	0	0	0	0	0	0	0	0	0	0	0	0	0	0	0	0	0	0	0	0	0	0	0	0	0	0.000405351	0	0	0	0	0	0	0	0
Bacteria;Firmicutes;Clostridia;Clostridiales;Incertae Sedis XIII;Mogibacterium	0	0	0	0	0	0	0	0	0	0	0	0	0	0	0	0	0	0	0	0	0	0	0	0	0	0	0	0	0	0	0	0	0	0	0	0	0	0	0	0	0	0	0	0	0	0	0	0	0
Bacteria;Firmicutes;Clostridia;Clostridiales;Lachnospiraceae;Catonella	0	0.000888889	0	0	0	0	0	0	0	0	0	0	0	0	0.000677048	0	0	0	0	0	0	0	0	0	0	0	0	0	0	0	0	0	0	0	0.00112613	0	0	0	0.00154919	0	0	0.000331016	0	0	0	0.000523013	0.000561167	0.000723589	0
Bacteria;Firmicutes;Clostridia;Clostridiales;Lachnospiraceae;Johnsonella	0.000514668	0	0	0	0	0	0	0	0	0	0	0	0	0	0	0	0	0	0	0	0	0	0	0	0	0	0	0	0	0	0	0	0	0	0	0	0	0	0	0	0	0	0	0	0	0	0	0	0
Bacteria;Firmicutes;Clostridia;Clostridiales;Lachnospiraceae;Moryella	0.00102934	0.00177778	0	0	0	0	0	0	0	0	0	0	0.00101937	0.000383877	0	0.000653168	0	0	0	0	0	0	0	0	0	0	0	0	0.000660939	0	0	0	0	0	0.000563063	0	0	0.00610169	0	0	0	0	0	0	0	0	0	0	0.000726744
Bacteria;Firmicutes;Clostridia;Clostridiales;Lachnospiraceae;Oribacterium	0.00102934	0.000888889	0	0	0.00682382	0.00116144	0.000625391	0	0.000619195	0	0	0	0.00152905	0.00115163	0.0013541	0.0019595	0	0.000611621	0.000619195	0	0	0	0	0	0.000576369	0.00157109	0.000420521	0.000614628	0.00132188	0	0	0	0	0	0.00168919	0	0.000633714	0.00610169	0	0	0	0.000331016	0	0	0	0.00313808	0.0016835	0	0.00145349
Bacteria;Firmicutes;Clostridia;Clostridiales;Lachnospiraceae;Shuttleworthia	0	0	0	0	0	0	0	0	0	0	0	0	0	0	0	0	0	0	0	0	0	0	0	0	0	0	0	0	0	0	0	0	0	0	0	0	0	0	0	0	0	0	0	0	0	0	0	0	0
Bacteria;Firmicutes;Clostridia;Clostridiales;Peptostreptococcaceae;Peptostreptococcus	0.000514668	0	0	0	0	0	0	0	0	0	0	0	0	0	0	0	0	0	0	0	0	0	0	0	0	0	0	0	0	0.00062383	0	0	0	0	0	0	0	0	0	0	0	0	0	0	0	0	0	0	0
Bacteria;Firmicutes;Clostridia;Clostridiales;Veillonellaceae;Anaeroglobus	0	0.00355556	0	0	0	0	0	0	0	0	0	0	0	0	0	0	0	0	0	0	0	0	0	0	0	0	0	0	0	0	0	0	0	0	0	0	0	0	0	0	0	0	0	0	0	0	0	0	0
Bacteria;Firmicutes;Clostridia;Clostridiales;Veillonellaceae;Dialister	0	0.00533333	0	0	0.000620347	0	0	0	0.000619195	0	0	0	0	0.000767754	0	0	0	0	0	0	0	0	0	0	0	0	0	0	0	0	0	0	0	0	0	0	0	0	0	0	0	0	0	0	0	0	0	0	0
Bacteria;Firmicutes;Clostridia;Clostridiales;Veillonellaceae;Megasphaera	0	0.00888889	0	0	0.00186104	0	0	0	0	0	0	0	0.0030581	0.00230326	0.00473934	0.0202482	0	0	0	0	0	0	0	0	0	0	0	0	0	0	0.0011308	0.00059453	0	0	0	0.000469484	0.00190114	0.00135593	0	0.000724638	0	0	0	0	0	0.00261506	0.00224467	0	0
Bacteria;Firmicutes;Clostridia;Clostridiales;Veillonellaceae;Selenomonas	0	0.00177778	0	0	0	0	0	0	0	0	0.00069735	0.000456621	0.00203874	0.000767754	0	0.00130634	0	0	0	0	0	0	0	0	0	0	0	0	0	0	0.000376932	0	0	0	0	0	0	0.0020339	0.00154919	0.000724638	0	0	0	0	0	0	0.000561167	0	0
Bacteria;Firmicutes;Clostridia;Clostridiales;Veillonellaceae;Veillonella	0.0386001	0.194667	0.0140598	0.0329004	0.0738213	0.0534262	0.0569106	0.0798226	0.0260062	0.022069	0.0181311	0.174886	0.234964	0.22572	0.256601	0.265186	0.0468468	0.00795107	0.0377709	0.00939597	0.0101744	0.00868193	0.0240811	0.0230924	0.0322767	0.0149254	0.00925147	0.0411801	0.132188	0.0162196	0.00301545	0.0172414	0.00706215	0.0815217	0.0647523	0.0530516	0.147655	0.104407	0.0278854	0.0166667	0.0101338	0.00430321	0.0175439	0.0320285	0.0731132	0.0983264	0.144781	0.000723589	0.0530523
Bacteria;Firmicutes;Erysipelotrichi;Erysipelotrichales;Erysipelotrichaceae;Bulleidia	0	0	0	0	0	0	0	0	0	0	0	0	0	0	0	0	0	0	0	0	0	0	0	0	0	0	0	0	0	0	0	0	0	0	0	0	0	0	0	0	0	0	0	0	0	0	0	0	0
Bacteria;Firmicutes;Erysipelotrichi;Erysipelotrichales;Erysipelotrichaceae;Solobacterium	0.001544	0.000888889	0	0	0.000620347	0	0.000625391	0	0	0	0	0	0.000509684	0.00191939	0	0.00261267	0	0	0	0	0	0	0	0	0	0	0	0	0	0	0	0	0	0	0	0	0.00126743	0.000677966	0	0	0	0	0	0	0	0.00104603	0.0016835	0	0
Bacteria;Fusobacteria;Fusobacteria;Fusobacteriales;Fusobacteriaceae;Fusobacterium	0.0113227	0.00977778	0.00351494	0	0.000620347	0.0441347	0.00125078	0.00369549	0.00247678	0.00551724	0.0013947	0.0251142	0.0259939	0.0049904	0.000677048	0.000653168	0.0348348	0.00856269	0.00371517	0.00536913	0.000726744	0.00157853	0.00190114	0.00401606	0.0167147	0.00549882	0	0.00307314	0.00330469	0.00311915	0.00188466	0.00237812	0.00141243	0.00362319	0.0230856	0.00234742	0.00253485	0.0325424	0.0426026	0.00362319	0.0016214	0.00231711	0.00129955	0.00142349	0.0100236	0.0125523	0.0145903	0	0.00726744
Bacteria;Fusobacteria;Fusobacteria;Fusobacteriales;Leptotrichiaceae;Leptotrichia	0.00463201	0.016	0.0246046	0.000865801	0.00868486	0.010453	0.000625391	0.00591279	0.00371517	0.000689655	0.00069735	0.0374429	0.00356779	0.00690979	0.00338524	0.00130634	0.0012012	0.0122324	0.00123839	0.00872483	0.0101744	0.00394633	0.00126743	0	0.00115274	0.00785546	0.000420521	0.000614628	0.000660939	0	0.000376932	0.00118906	0.000706215	0.00301932	0.00619369	0.00140845	0.00253485	0.106441	0.0255616	0.00797101	0	0.000993049	0	0.0227758	0.00176887	0.00313808	0.00224467	0	0.0116279
Bacteria;Fusobacteria;Fusobacteria;Fusobacteriales;Leptotrichiaceae;Streptobacillus	0	0	0	0	0	0.0209059	0	0	0	0.0255172	0	0	0	0	0	0	0.003003	0.000611621	0.00185759	0.00134228	0	0	0	0	0.0092219	0.00157109	0	0	0	0	0	0	0	0.00422705	0.000563063	0	0	0	0	0	0.00283745	0.000993049	0	0	0.00412736	0.00104603	0	0	0
Bacteria;Proteobacteria;Alphaproteobacteria;Caulobacterales;Caulobacteraceae;Brevundimonas	0	0	0	0	0	0	0	0	0	0	0	0	0	0	0	0	0	0	0	0	0	0	0	0	0	0	0	0	0	0	0	0	0	0	0	0	0	0	0	0	0	0	0	0	0	0	0	0	0
Bacteria;Proteobacteria;Alphaproteobacteria;Rhizobiales;Bradyrhizobiaceae;Bradyrhizobium	0	0	0	0	0	0	0	0	0	0	0	0	0	0	0	0	0	0	0	0	0	0	0	0	0	0	0	0	0	0	0	0	0	0	0	0	0	0	0	0	0	0	0	0	0	0	0	0	0
Bacteria;Proteobacteria;Betaproteobacteria;Burkholderiales;Burkholderiaceae;Ralstonia	0	0	0	0	0	0	0	0	0	0	0	0	0	0	0	0	0	0	0	0	0	0	0	0	0	0	0	0	0	0	0	0	0	0	0	0	0	0	0	0	0	0	0	0	0	0	0	0	0
Bacteria;Proteobacteria;Betaproteobacteria;Burkholderiales;Comamonadaceae;Acidovorax	0.000514668	0	0	0	0	0	0	0	0	0	0	0	0	0	0	0	0	0	0	0	0	0	0	0	0	0	0	0	0	0	0	0	0	0	0	0	0	0	0	0.00434783	0	0	0	0	0	0	0	0	0
Bacteria;Proteobacteria;Betaproteobacteria;Burkholderiales;Comamonadaceae;Comamonas	0	0	0	0	0	0	0	0	0	0	0	0	0	0	0	0	0	0	0	0	0	0	0	0	0	0	0	0	0	0	0	0	0	0	0	0	0	0	0	0	0	0	0	0	0	0	0	0	0
Bacteria;Proteobacteria;Betaproteobacteria;Burkholderiales;Comamonadaceae;Diaphorobacter	0	0	0	0	0	0	0	0	0	0	0	0	0	0	0	0	0	0	0	0	0	0	0	0	0	0	0	0	0	0	0	0	0	0	0	0	0	0	0	0	0	0	0	0	0	0	0	0	0
Bacteria;Proteobacteria;Betaproteobacteria;Burkholderiales;Comamonadaceae;Ottowia	0	0	0	0	0	0	0	0	0	0	0	0	0	0	0	0	0	0	0	0	0	0	0	0	0	0	0	0	0	0	0	0	0	0	0	0	0	0.00474576	0	0	0	0	0	0	0	0	0	0	0
Bacteria;Proteobacteria;Betaproteobacteria;Burkholderiales;Comamonadaceae;Pelomonas	0	0	0	0	0	0	0	0	0	0	0	0	0	0	0	0	0	0	0	0	0	0	0	0	0	0	0	0	0	0	0	0	0	0	0	0	0	0	0	0.000724638	0	0	0	0	0	0	0	0	0
Bacteria;Proteobacteria;Betaproteobacteria;Neisseriales;Neisseriaceae;Kingella	0.00360268	0.000888889	0.00175747	0.0034632	0	0	0	0.0014782	0.000619195	0.00206897	0.0027894	0.00273973	0.00203874	0.000767754	0	0	0	0.000611621	0.00247678	0.0147651	0	0	0	0	0.000576369	0	0.000841043	0.00245851	0.00198282	0	0.0011308	0.00297265	0	0.00301932	0	0.000469484	0.00126743	0.0020339	0.00464756	0.00289855	0	0	0	0.00213523	0	0	0	0	0.000726744
Bacteria;Proteobacteria;Betaproteobacteria;Neisseriales;Neisseriaceae;Neisseria	0.0241894	0.00177778	0.0957821	0.278788	0.0992556	0.0180023	0.0806754	0.0162602	0.0408669	0.0689655	0.0202232	0.0611872	0.0203874	0.0084453	0.00812458	0.00391901	0.0036036	0.0201835	0.0439628	0.0281879	0.0138081	0.0173639	0.11597	0.0732932	0.00979827	0.0180676	0.0113541	0.00860479	0	0	0.00339239	0.00178359	0.0225989	0.0320048	0.0163288	0.0169014	0.0114068	0.0115254	0.0580945	0.115942	0.000810701	0.0132406	0.00584795	0.0903915	0.00825472	0.120816	0	0.0065123	0.132267
Bacteria;Proteobacteria;Betaproteobacteria;Neisseriales;Neisseriaceae;Simonsiella	0	0	0	0	0	0	0	0	0	0	0	0	0	0	0	0	0	0	0	0	0	0	0	0	0	0	0	0	0	0	0	0	0	0	0.000563063	0	0	0	0	0	0	0	0.000649773	0	0	0	0	0	0
Bacteria;Proteobacteria;Epsilonproteobacteria;Campylobacterales;Campylobacteraceae;Campylobacter	0	0.00177778	0	0	0.00124069	0.00058072	0.000625391	0.000739098	0	0.000689655	0	0.00456621	0.00152905	0.00307102	0.00406229	0.00130634	0.000600601	0.000611621	0	0.000671141	0.000726744	0	0.000633714	0	0	0.00235664	0	0.000614628	0.000660939	0	0.000753864	0	0	0.00120773	0.000563063	0.000938967	0.00126743	0.0020339	0	0.00217391	0	0.000331016	0	0	0	0.00104603	0.000561167	0	0.000726744
Bacteria;Proteobacteria;Gammaproteobacteria;Cardiobacteriales;Cardiobacteriaceae;Cardiobacterium	0.000514668	0	0.000878735	0	0.000620347	0	0.000625391	0	0	0.000689655	0	0.000456621	0	0	0	0	0	0.000611621	0.000619195	0	0.00290698	0	0	0.00100402	0.000576369	0.000785546	0	0	0.000660939	0	0.000376932	0	0	0	0.00112613	0.000469484	0	0.000677966	0.00154919	0.00144928	0	0	0	0.00142349	0	0	0	0	0
Bacteria;Proteobacteria;Gammaproteobacteria;Pasteurellales;Pasteurellaceae;Aggregatibacter	0.00566135	0.00355556	0.000878735	0	0	0.0029036	0	0.00221729	0	0.0124138	0.0013947	0.00547945	0.00407747	0.000383877	0.00406229	0.00261267	0	0.00122324	0.00185759	0.00268456	0.0188953	0.0197316	0.00190114	0	0.00115274	0.00549882	0	0.00245851	0	0	0.00339239	0	0.000706215	0	0.00225225	0.000938967	0	0.000677966	0.00542215	0.0057971	0	0.000993049	0.00129955	0.00284698	0.000589623	0.00104603	0	0.000723589	0.0123547
Bacteria;Proteobacteria;Gammaproteobacteria;Pasteurellales;Pasteurellaceae;Haemophilus	0.00772002	0	0.0114236	0	0.014268	0.00406504	0.0744215	0.00295639	0.000619195	0.0344828	0.0683403	0.0141553	0.0254842	0.00307102	0.00203114	0.00457218	0.00720721	0.00795107	0.0693498	0.0154362	0.0116279	0.00394633	0.00253485	0.00401606	0.000576369	0.000785546	0.00378469	0.000614628	0	0	0.00565398	0.00891795	0.00141243	0.000603865	0.000563063	0.00469484	0.00253485	0.000677966	0.00774593	0.00507246	0.000810701	0.000993049	0.0103964	0.00925267	0.00117925	0.00104603	0.000561167	0.0607815	0
Bacteria;Proteobacteria;Gammaproteobacteria;Pseudomonadales;Moraxellaceae;Acinetobacter	0	0.00177778	0	0	0	0	0	0	0	0	0	0	0	0	0	0	0	0	0	0	0	0	0	0	0	0	0	0	0.00198282	0	0	0	0	0	0	0	0	0	0	0	0	0	0	0	0	0	0	0	0
Bacteria;Proteobacteria;Gammaproteobacteria;Pseudomonadales;Pseudomonadaceae;Pseudomonas	0	0	0	0	0	0	0	0	0	0	0	0	0	0	0	0	0	0	0	0	0	0	0	0	0	0	0	0	0	0	0	0	0	0	0	0	0	0	0	0.000724638	0	0	0	0	0	0	0	0	0
Bacteria;Proteobacteria;Gammaproteobacteria;Xanthomonadales;Xanthomonadaceae;Xanthomonas	0	0	0	0	0	0	0	0	0	0	0	0	0	0	0	0	0	0	0	0	0	0	0	0	0	0	0	0	0	0	0	0	0	0	0	0	0	0	0	0	0	0	0	0	0	0	0	0	0
Bacteria;Spirochaetes;Spirochaetes;Spirochaetales;Spirochaetaceae;Treponema	0	0.0115556	0	0	0	0	0	0	0	0	0	0	0	0.000383877	0	0	0	0	0	0	0	0	0	0	0	0	0	0	0	0	0	0	0.000706215	0	0	0	0	0	0	0	0	0	0	0	0	0	0.000561167	0	0
Bacteria;SR1;SR1_genera_incertae_sedis	0	0	0	0	0	0.00232288	0	0	0	0.00551724	0	0	0	0	0	0	0.000600601	0	0	0	0	0	0	0	0	0	0	0	0	0	0	0	0.000706215	0	0	0	0	0.0020339	0	0	0	0	0	0	0	0.000523013	0	0	0
Bacteria;Tenericutes;Mollicutes;Mycoplasmatales;Mycoplasmataceae;Mycoplasma	0	0	0	0	0	0	0	0	0	0	0	0	0	0	0	0	0	0	0	0	0	0	0	0	0	0	0	0	0	0	0	0	0	0	0	0	0	0	0	0	0	0	0	0	0	0	0	0	0
Bacteria;TM7;TM7_genera_incertae_sedis	0.000514668	0	0	0.0017316	0	0.00813008	0	0.000739098	0	0	0	0.000913242	0.00713558	0.00191939	0	0	0	0	0.000619195	0.00402685	0	0	0.000633714	0.00100402	0	0	0	0.00245851	0	0	0	0.00118906	0	0.000603865	0	0.000938967	0.0101394	0.0101695	0	0	0	0	0	0.00142349	0.000589623	0.00156904	0.00280584	0	0
Number of genera found in each sample	27	30	17	16	24	22	18	19	18	21	18	22	25	28	21	22	18	21	20	21	18	17	17	15	19	22	14	20	16	13	23	18	17	18	23	21	20	29	20	24	12	18	13	18	18	26	23	11	20
Note1: The numbers in the table depict relative abundance of genera in each sample. Value that is missing to 1, could not be assigned to a bacterial genus.
Note2: Candidate divisions SR1 and TM7 as well as Chloroplasts are also included in this table.
[truncated: 216 more columns]
