# Supplementary material for: Nurture trumps nature in a longitudinal survey of salivary bacterial communities in twins from early adolescence to early adulthood
Source: HighWire-hosted journal article supplement (doi:10.1101/gr.140608.112), 2012-10-12
Supplement: Stahringer_table_S3.xlsx [file Stahringer_table_S3.xlsx]

## Sheet: Sheet1
#OTU ID	S00008	S00016	S00021	S00036	S00041	S00047	S00049	S00054	S00055	S00070	S00074	S00083	S00086	S00102	S00104	S00106	S00108	S00109	S00112	S00113	S00121	S00123	S00131	S00132	S00145	S00146	S00167	S00173	S00178	S00180	S00181	S00186	S00221	S00223	S00240	S00250	S00305	S00308	S00329	S00330	S00343	S00345	S00358	S00413	S00415	S00429	S00430	S00530	S00532
OTU_97.1	148	36	185	162	140	246	160	234	244	196	316	483	81	12	3	18	162	247	210	153	205	185	263	212	211	174	474	258	17	297	670	328	188	230	223	147	169	31	165	161	154	1098	348	166	132	27	163	193	32
OTU_97.578	48	12	51	21	67	65	29	44	30	93	78	22	24	8	1	4	86	157	111	74	74	112	43	36	117	47	338	38	1	55	45	23	96	77	64	86	25	16	46	95	113	442	166	15	34	7	38	113	11
OTU_97.9	26	1	21	22	49	31	24	27	30	43	52	50	7	2	0	1	34	36	28	33	35	36	49	41	57	63	49	24	3	38	63	35	32	55	41	16	30	12	20	22	68	112	74	15	43	4	31	35	2
OTU_97.93	21	5	26	30	44	12	25	22	7	31	27	22	12	1	1	3	18	20	19	41	23	31	29	25	33	29	21	29	8	94	147	43	22	48	65	13	18	4	21	18	39	46	38	9	38	7	17	24	9
OTU_97.149	12	7	50	5	49	11	44	22	15	0	2	30	12	9	1	4	3	3	1	0	0	1	38	21	5	1	1	19	1	50	73	10	4	13	11	31	42	12	19	25	22	5	6	2	5	12	109	1	6
OTU_97.536	18	5	7	16	8	18	15	4	18	11	3	9	5	2	1	8	2	15	8	8	6	7	6	2	3	20	11	14	1	14	168	2	14	14	33	22	26	4	15	16	17	11	9	6	1	1	13	12	14
OTU_97.2	102	13	7	0	9	1	62	46	61	1	0	0	41	284	74	20	2	10	24	5	9	6	2	2	4	20	47	158	358	2	4	10	8	0	15	64	193	25	3	75	106	54	3	0	11	238	16	15	94
OTU_97.297	7	4	10	37	14	8	8	9	7	2	10	12	8	0	0	3	4	5	8	6	9	6	11	19	8	9	13	15	2	18	53	13	8	13	14	15	19	8	12	12	17	11	11	10	4	1	4	3	5
OTU_97.5	19	3	21	95	26	21	35	35	47	14	31	10	136	189	24	5	18	93	47	8	61	8	53	12	5	9	15	7	7	0	23	41	0	2	20	21	7	6	15	17	14	4	37	64	11	81	7	14	63
OTU_97.132	46	2	24	7	49	21	22	27	7	70	31	11	15	1	1	1	26	116	73	33	35	65	10	11	43	26	141	49	1	63	17	7	125	41	39	20	16	6	16	31	83	115	115	8	23	5	22	118	5
OTU_97.311	16	2	37	7	46	31	39	14	48	115	76	19	18	5	0	6	32	76	118	79	49	57	16	32	67	28	101	12	1	74	145	45	49	71	63	70	21	5	38	135	71	99	49	27	72	0	28	26	5
OTU_97.302	11	5	20	42	43	25	17	22	26	22	29	65	6	3	1	3	26	28	14	35	45	47	40	33	52	36	76	49	0	45	149	73	41	56	33	8	20	3	18	28	35	172	60	7	33	3	18	36	7
OTU_97.8	82	1	30	31	33	13	16	4	29	19	40	1	10	2	1	4	15	4	8	16	70	12	89	29	17	63	91	0	0	7	5	15	18	14	7	55	11	31	36	31	3	21	8	96	16	0	4	60	2
OTU_97.56	35	3	2	1	3	4	2	5	6	5	7	5	17	28	3	1	4	7	5	5	14	4	5	9	5	13	27	3	6	3	4	1	10	8	15	13	4	3	2	1	13	24	7	0	1	4	7	9	6
OTU_97.15	40	2	3	4	9	17	6	3	8	1	0	2	5	126	5	14	1	4	7	1	29	0	1	0	2	2	5	9	39	0	7	2	1	4	18	32	42	10	2	4	0	5	0	0	2	65	35	1	12
OTU_97.219	18	7	18	31	138	42	106	30	7	91	89	32	1	0	1	3	34	53	32	121	7	85	110	63	113	144	49	4	1	27	29	55	19	197	171	8	33	24	15	11	102	49	94	17	174	2	26	18	0
OTU_97.140	22	16	0	10	14	16	9	8	7	0	1	16	123	145	58	68	0	2	1	0	0	1	5	0	0	1	5	14	79	6	2	13	1	6	20	9	27	31	8	2	0	2	0	2	1	34	47	1	15
OTU_97.7	32	114	5	0	64	4	37	11	20	0	0	31	57	234	226	221	1	3	2	0	3	4	9	3	1	8	5	13	65	2	4	5	6	0	37	8	83	76	2	6	2	7	2	16	8	92	29	0	15
OTU_97.310	7	0	16	1	2	3	2	1	3	3	1	5	67	22	18	0	1	6	2	0	12	1	67	9	0	2	1	3	14	3	8	4	7	7	14	11	9	4	8	11	6	2	0	70	10	34	2	0	23
OTU_97.4	26	23	2	0	51	8	16	11	13	0	0	1	72	238	36	164	2	3	0	0	4	0	0	1	3	3	3	7	60	9	2	1	0	0	69	3	50	117	3	7	0	11	1	1	1	304	218	0	3
OTU_97.287	2	5	9	25	15	27	35	10	5	0	1	124	203	121	12	6	1	1	0	2	6	3	9	11	0	2	0	31	10	16	2	6	1	32	20	7	78	12	4	2	0	1	6	23	11	23	33	0	20
OTU_97.557	19	3	17	2	18	5	4	5	4	14	27	1	2	1	0	2	6	0	2	7	22	3	51	7	25	43	58	0	2	2	1	3	4	3	1	15	3	6	11	19	0	12	6	44	11	0	2	19	1
OTU_97.6	63	3	23	0	4	2	96	26	163	13	0	0	3	4	0	3	5	66	48	72	79	2	6	9	12	49	106	0	0	17	0	13	3	50	71	31	73	8	10	9	94	33	0	34	26	6	7	77	0
OTU_97.189	18	40	0	0	19	0	8	3	10	1	1	8	31	66	75	89	0	3	0	0	3	2	8	2	0	3	8	5	42	0	0	1	1	1	12	4	37	18	2	2	0	3	1	2	5	28	25	0	19
OTU_97.142	38	4	1	0	0	2	0	1	12	2	1	0	11	36	2	1	1	4	1	2	3	4	2	0	0	6	7	0	7	1	4	1	1	3	2	39	0	0	2	1	7	10	1	0	2	2	0	1	5
OTU_97.286	11	2	5	0	6	0	2	2	9	8	5	1	4	5	0	0	3	12	5	1	2	6	1	2	2	4	13	5	0	6	0	0	4	3	4	5	1	1	4	4	26	9	8	0	5	0	0	5	1
OTU_97.3	91	24	5	0	2	0	3	1	4	0	0	0	24	29	119	53	0	0	5	0	0	0	0	0	1	3	1	62	152	105	0	2	5	0	33	1	25	39	13	3	23	12	2	2	1	11	2	1	0
OTU_97.145	34	9	42	21	43	49	6	24	2	12	24	33	0	0	0	3	84	14	38	7	51	65	44	32	51	14	28	8	3	60	53	30	4	34	8	21	6	2	4	20	7	95	70	1	2	5	33	31	0
OTU_97.392	17	0	0	0	1	0	15	8	14	0	0	0	1	4	0	2	0	0	5	1	0	1	1	0	3	0	1	7	1	0	0	8	0	1	2	10	13	6	2	3	23	1	1	0	2	7	20	3	3
OTU_97.19	20	1	1	0	0	0	0	1	6	1	0	0	12	44	0	3	0	3	0	1	0	1	0	1	0	1	5	0	5	1	3	1	2	2	7	20	0	3	1	1	1	6	3	0	3	3	2	0	4
OTU_97.21	11	2	1	0	1	55	2	0	3	5	0	17	6	8	0	0	1	7	0	4	1	1	1	3	3	2	0	2	3	1	2	1	2	0	14	3	0	18	9	1	0	1	2	1	0	19	16	0	9
OTU_97.602	1	0	21	53	10	2	10	1	12	0	0	5	65	83	26	3	9	29	1	0	22	0	76	24	0	2	2	2	2	0	12	6	4	9	9	14	4	1	10	6	21	6	5	55	3	24	1	0	16
OTU_97.160	31	1	0	1	0	3	4	4	3	1	0	0	10	35	1	3	1	1	0	1	0	1	0	2	1	9	14	0	3	0	7	0	2	2	4	48	2	1	0	6	9	4	0	0	6	3	5	0	5
OTU_97.172	0	0	6	9	4	1	6	3	4	5	4	11	4	0	0	0	7	8	5	3	3	2	4	12	7	8	9	3	0	13	15	6	2	7	9	8	8	2	6	15	6	14	4	5	8	1	0	2	0
OTU_97.92	4	1	11	17	14	10	10	9	15	11	2	10	2	2	0	2	3	10	15	12	12	9	9	7	5	7	13	9	0	12	25	14	7	4	13	13	10	2	3	7	15	13	7	19	3	2	2	4	0
OTU_97.11	7	0	10	0	1	1	5	0	24	15	15	1	0	2	12	6	1	13	6	2	9	4	1	0	3	18	17	8	0	0	5	2	3	16	2	27	0	5	5	58	2	0	0	0	2	192	0	3	96
OTU_97.407	5	3	6	0	2	0	6	4	2	0	2	1	0	9	3	1	1	13	7	25	0	2	1	0	1	7	12	118	34	0	5	8	2	4	1	3	2	13	0	0	1	24	0	10	3	8	2	0	0
OTU_97.22	7	1	7	15	3	1	1	0	0	0	1	0	3	0	5	2	0	2	1	1	1	1	3	4	0	0	3	12	4	8	3	2	5	14	23	3	9	2	17	5	0	1	0	30	7	2	0	0	34
OTU_97.314	23	0	2	9	1	1	1	1	6	3	0	0	2	35	0	4	0	1	2	0	1	0	2	0	0	1	1	3	20	2	2	6	0	2	8	21	16	3	1	3	0	0	0	0	1	35	10	0	10
OTU_97.17	7	1	1	0	1	0	6	5	7	0	0	0	3	20	3	4	0	0	1	0	1	0	1	0	0	1	5	12	22	0	0	0	0	0	1	6	13	5	0	5	3	5	0	0	2	21	0	0	4
OTU_97.285	8	2	0	0	0	0	2	1	10	0	0	0	6	15	2	1	0	4	2	0	12	2	5	1	0	7	2	3	9	1	1	0	1	1	5	3	3	8	1	1	24	3	0	0	0	1	1	3	4
OTU_97.288	3	0	1	0	0	1	14	3	33	4	1	1	1	7	1	0	8	24	30	27	5	2	11	17	15	13	25	1	0	34	1	9	6	14	2	3	6	3	2	0	26	19	0	14	10	0	0	40	0
OTU_97.196	15	0	2	0	0	0	19	5	44	3	1	4	0	0	0	0	1	67	17	45	7	7	9	8	23	31	18	0	1	51	3	21	8	14	8	0	21	5	2	3	20	4	0	33	22	1	0	64	0
OTU_97.12	7	1	55	231	104	5	72	14	22	38	7	44	10	12	0	0	4	14	17	19	1	7	56	23	6	3	0	2	0	0	0	0	10	25	16	0	3	8	19	20	0	26	3	59	6	11	0	3	28
OTU_97.187	7	1	0	0	0	2	3	3	4	0	0	0	2	14	8	0	0	0	1	1	0	0	0	0	0	0	5	11	23	0	0	0	0	0	1	5	9	4	0	5	5	5	0	0	0	15	1	1	9
OTU_97.32	7	0	8	59	7	0	6	2	5	0	7	0	0	1	3	0	1	4	14	26	1	4	4	0	3	7	2	20	9	2	3	0	2	6	2	5	4	3	6	14	0	0	0	12	1	4	0	2	0
OTU_97.37	3	2	4	0	0	0	2	5	2	0	0	0	0	6	0	0	1	3	7	9	1	0	0	0	2	2	7	66	32	0	0	9	0	1	0	3	5	11	0	4	1	9	0	4	3	8	1	4	0
OTU_97.102	3	0	3	1	1	0	37	12	61	1	2	3	0	3	0	0	1	13	17	7	7	4	9	5	1	11	34	2	1	2	1	61	1	7	6	1	10	2	0	0	24	13	2	1	2	0	1	41	0
OTU_97.122	9	0	0	0	0	0	0	0	2	0	0	0	4	0	8	6	0	0	3	1	0	0	1	0	0	1	2	4	7	5	0	1	0	0	10	1	4	4	1	1	10	3	0	0	0	4	0	1	0
OTU_97.592	2	0	1	1	0	0	1	0	3	2	0	2	1	6	0	0	2	0	0	1	3	2	2	0	3	1	8	5	0	0	1	1	8	6	1	3	1	1	6	1	5	8	3	0	1	0	1	4	1
OTU_97.16	31	9	2	0	2	0	1	2	3	0	0	0	6	5	35	16	0	0	1	0	0	1	0	0	0	0	2	20	47	10	0	0	0	0	7	1	2	10	1	1	4	4	0	0	0	8	2	0	0
OTU_97.354	0	1	0	1	15	4	3	1	3	0	0	0	15	53	8	23	0	1	0	0	0	0	0	1	0	1	0	4	28	3	1	1	1	0	29	1	4	20	0	2	0	0	0	0	0	92	89	0	2
OTU_97.18	21	2	37	0	11	195	3	42	0	70	95	81	36	0	0	2	145	43	48	36	47	24	7	5	81	5	19	1	1	0	2	37	0	67	38	50	15	10	55	30	17	17	7	7	82	11	23	1	0
OTU_97.388	4	0	5	2	4	0	2	2	2	6	0	4	5	2	0	2	1	1	5	4	4	7	2	2	2	2	2	2	0	3	5	1	0	1	2	9	1	1	3	3	8	1	2	3	0	2	2	2	0
OTU_97.24	7	0	3	0	0	16	0	8	1	1	2	3	0	3	0	1	0	2	0	0	13	1	1	1	2	2	1	0	0	1	4	14	0	6	2	3	2	2	2	1	0	0	1	0	0	15	4	0	3
OTU_97.30	1	0	0	0	1	0	1	0	1	0	2	0	1	4	0	0	0	0	0	0	1	0	2	0	1	1	1	7	1	0	0	0	0	0	2	6	1	2	0	0	0	1	1	2	1	0	0	0	6
OTU_97.376	5	1	3	2	7	3	3	3	5	11	2	5	2	0	0	0	5	10	14	4	6	10	0	0	2	5	6	2	0	6	3	2	8	6	4	1	3	0	4	1	6	10	5	25	2	0	3	4	1
OTU_97.14	2	1	23	2	69	75	0	31	0	18	41	16	15	0	0	1	59	2	5	16	13	5	5	14	16	2	16	11	0	79	110	116	3	4	25	216	4	1	13	34	3	13	45	2	2	2	5	14	0
OTU_97.97	5	0	1	0	5	1	3	1	0	6	5	3	2	0	0	0	1	5	3	3	7	7	4	7	6	1	19	2	1	2	25	12	3	7	3	3	5	1	2	2	4	17	15	5	3	1	4	1	2
OTU_97.628	8	1	2	0	0	0	0	0	0	0	0	0	1	3	4	1	2	1	3	0	0	0	1	0	0	0	0	1	0	0	0	0	2	0	1	0	1	3	5	2	3	0	0	0	0	3	8	0	18
OTU_97.173	6	0	0	0	0	0	10	4	31	1	0	0	0	0	1	1	2	10	3	10	2	6	2	1	4	7	18	0	0	21	0	9	0	5	7	2	4	1	1	1	5	10	0	5	6	1	3	13	0
OTU_97.416	2	0	0	0	0	0	1	0	1	0	0	0	2	7	1	0	0	0	0	0	0	0	2	1	0	0	1	2	3	0	3	1	0	1	1	8	1	5	1	0	0	0	0	0	1	0	0	0	8
OTU_97.512	2	0	0	1	9	1	6	2	7	0	0	0	8	35	5	19	0	1	0	0	0	0	0	0	0	0	0	1	12	1	0	0	0	0	5	0	6	16	1	2	0	1	0	0	0	52	32	0	2
OTU_97.263	2	5	0	0	0	0	3	0	6	1	0	0	0	1	0	3	0	1	3	7	14	1	1	0	2	4	5	0	3	2	0	0	2	0	1	1	3	14	0	0	23	35	0	18	1	0	0	4	5
OTU_97.569	1	0	4	2	17	4	3	1	4	3	7	3	1	0	0	0	2	3	7	13	1	4	13	5	12	37	13	4	0	4	2	2	4	18	20	2	0	4	5	2	17	10	14	1	14	0	1	0	0
OTU_97.218	4	1	0	0	0	0	3	0	2	2	0	0	3	1	0	0	0	0	4	0	1	3	0	1	0	1	1	5	4	0	0	0	2	1	0	1	3	0	4	1	3	2	0	0	0	5	3	2	4
OTU_97.284	14	1	1	0	0	0	2	1	9	0	0	0	3	5	3	3	1	0	1	0	0	0	0	0	0	1	5	1	3	0	2	2	0	1	2	28	0	0	1	2	3	1	0	0	0	0	0	0	1
OTU_97.343	1	0	3	0	4	0	25	3	24	4	1	1	1	1	0	0	1	6	9	10	3	2	2	2	2	2	15	1	0	1	1	11	2	5	7	1	3	2	0	1	16	8	1	6	4	0	0	17	0
OTU_97.393	9	0	1	0	1	0	0	0	0	0	0	0	0	39	0	0	0	1	4	0	0	0	0	0	0	1	1	2	0	0	2	0	0	0	7	6	0	0	1	1	23	0	0	0	0	5	2	0	5
OTU_97.43	16	0	5	5	1	7	16	1	11	4	1	2	5	1	1	0	0	1	0	2	3	2	8	7	1	1	4	1	0	2	1	2	0	1	40	5	1	9	6	3	0	3	0	6	5	3	2	1	11
OTU_97.381	8	0	18	67	35	7	24	0	10	7	2	83	9	2	0	0	1	0	0	5	2	9	115	48	3	2	0	2	0	0	0	0	18	0	3	2	9	0	36	22	0	10	6	48	4	1	0	0	4
OTU_97.151	2	0	4	0	5	0	0	0	0	10	11	1	1	0	1	0	1	0	3	5	11	2	8	1	9	12	12	0	1	0	0	0	0	4	1	4	0	3	3	5	4	3	7	8	9	0	0	1	1
OTU_97.33	2	1	0	0	10	2	1	0	1	0	0	0	3	2	2	2	0	0	0	0	0	0	0	0	1	1	1	1	2	0	0	0	0	0	3	0	1	8	0	0	0	1	0	0	0	6	2	0	2
OTU_97.10	1	10	0	0	13	101	2	201	0	18	76	143	100	0	0	5	326	11	31	32	10	1	0	1	41	7	1	1	0	0	0	0	0	111	20	99	0	1	211	37	529	5	0	14	316	8	115	0	0
OTU_97.28	18	0	1	2	0	4	0	0	0	17	4	24	2	0	0	0	13	41	10	12	4	6	2	2	23	25	4	0	0	0	0	0	0	11	8	0	0	4	9	0	0	14	1	166	7	0	2	0	0
OTU_97.300	3	1	1	13	5	2	1	0	3	0	1	8	0	4	0	0	0	1	0	2	1	0	1	2	0	0	0	0	2	1	1	2	0	4	1	1	6	4	4	0	0	0	0	0	1	4	1	0	0
OTU_97.144	5	0	1	0	1	0	6	1	23	0	0	0	0	0	0	0	0	7	3	12	4	2	0	1	0	2	10	0	0	1	0	2	0	3	4	1	2	2	4	0	17	2	0	2	1	1	0	8	0
OTU_97.66	0	1	1	2	0	0	0	2	0	0	0	0	0	2	0	0	1	3	5	8	0	0	0	0	0	0	1	27	10	0	0	3	0	2	1	0	2	0	1	0	0	6	0	3	1	2	0	1	0
OTU_97.20	9	57	0	0	12	0	22	3	1	0	1	0	6	94	420	318	0	3	0	0	0	0	0	0	0	0	0	2	5	0	0	1	0	0	3	0	44	45	0	0	0	0	0	0	1	15	106	0	0
OTU_97.213	14	0	0	0	0	0	0	0	2	0	0	0	0	28	1	3	0	0	0	0	0	1	0	0	0	1	0	2	11	0	1	0	0	0	6	8	3	2	0	0	0	1	0	0	0	13	0	0	1
OTU_97.44	7	0	8	3	4	2	2	0	20	3	0	30	3	0	0	0	1	0	6	10	0	2	1	0	0	2	0	4	0	4	1	1	2	1	0	3	0	1	12	2	0	5	0	7	1	1	0	0	19
OTU_97.88	4	1	1	0	4	0	0	2	1	0	0	0	0	1	0	0	1	0	1	1	0	0	0	3	1	1	3	3	0	1	2	0	2	1	1	2	3	0	0	1	0	2	1	0	0	1	3	2	1
OTU_97.25	2	10	1	0	6	3	0	2	4	0	0	21	2	11	1	0	1	14	1	0	10	1	0	0	0	3	0	0	0	0	0	1	0	0	0	1	0	2	1	0	0	0	0	0	0	3	1	0	8
OTU_97.42	9	0	2	0	0	0	0	4	0	0	0	0	0	10	0	2	1	0	0	0	0	0	1	0	0	0	0	31	40	0	0	8	0	0	2	7	11	3	0	1	1	0	0	0	0	25	27	0	1
OTU_97.159	0	1	0	0	0	2	0	1	0	3	1	1	2	0	0	0	2	1	1	1	0	0	0	0	0	1	1	1	1	0	0	0	0	1	1	0	2	0	1	0	1	1	0	0	0	0	3	1	3
OTU_97.202	3	1	1	0	0	0	2	2	2	1	2	0	0	0	0	0	1	12	4	9	1	1	1	2	3	5	8	0	0	25	0	2	1	6	2	2	1	0	0	2	5	1	0	0	0	0	1	18	0
OTU_97.53	0	1	0	0	1	0	1	1	0	0	0	5	1	8	6	2	1	1	0	1	0	0	0	0	0	3	0	0	1	0	1	0	0	2	1	2	2	3	0	3	0	1	0	0	0	2	1	0	0
OTU_97.69	6	0	1	1	2	16	0	0	0	6	0	3	0	0	0	0	4	0	0	1	0	0	0	1	9	1	0	0	0	0	4	1	0	2	9	2	0	8	2	1	0	0	0	0	1	8	4	0	10
OTU_97.158	0	10	0	0	0	0	1	0	0	0	0	0	0	0	4	4	0	0	0	0	0	0	0	0	1	2	0	0	1	1	0	1	0	0	2	0	2	0	0	0	0	0	0	0	0	0	1	0	0
OTU_97.174	4	0	0	0	0	0	0	0	0	0	0	0	2	3	1	0	0	0	0	0	0	0	0	0	0	0	1	1	2	1	0	0	0	0	0	0	2	1	0	0	1	0	0	0	0	1	0	0	0
OTU_97.422	6	0	9	0	0	0	38	32	67	0	0	0	0	14	0	0	1	17	42	39	2	0	4	1	1	2	37	1	0	0	2	47	3	0	3	0	5	2	3	1	63	20	0	0	4	0	0	45	0
OTU_97.84	1	0	0	0	0	0	0	0	0	0	0	0	2	2	3	0	0	0	0	0	0	0	0	0	0	0	0	0	4	1	0	0	0	0	1	0	1	0	0	0	0	0	0	0	0	0	0	0	3
OTU_97.650	7	1	3	0	0	2	0	1	1	3	0	28	2	2	1	1	0	2	0	2	0	1	0	1	0	2	0	1	0	3	1	0	0	5	5	2	2	22	10	0	0	0	0	1	1	0	0	0	0
OTU_97.100	1	0	7	5	1	1	9	1	0	2	0	0	25	6	1	0	4	6	1	0	9	1	18	14	0	1	0	0	0	0	12	2	1	1	2	8	2	0	4	3	9	4	3	5	4	2	1	1	2
OTU_97.271	0	0	3	0	1	4	0	3	1	6	2	8	16	0	0	1	17	1	1	9	1	17	3	6	7	1	16	4	0	41	38	111	0	3	1	36	1	0	0	6	2	7	45	1	11	1	3	7	0
OTU_97.41	2	41	0	1	5	0	3	0	0	0	0	0	9	9	2	14	0	0	0	0	0	0	0	0	0	0	0	0	0	0	0	0	1	0	1	0	15	0	0	0	0	0	0	0	0	1	1	0	0
OTU_97.415	1	0	5	0	5	8	4	2	0	2	0	6	0	0	0	0	2	2	2	2	5	0	0	0	5	3	5	2	0	1	1	4	3	5	4	0	1	0	4	4	2	4	4	0	1	0	7	1	0
OTU_97.211	0	0	1	1	0	0	0	0	0	2	0	1	10	2	6	0	6	2	1	0	2	0	5	0	0	1	0	2	0	0	1	1	0	0	1	3	0	0	1	1	22	2	0	2	0	2	0	0	4
OTU_97.98	8	0	2	0	0	0	81	19	121	1	0	0	1	2	0	0	0	7	40	10	1	0	0	0	2	0	71	0	0	1	0	0	0	2	1	3	2	1	2	1	26	0	0	0	0	0	0	46	0
OTU_97.369	1	0	0	0	0	1	0	0	1	1	1	0	0	5	0	1	4	1	0	0	2	0	1	0	2	0	1	1	1	0	0	1	0	3	2	2	2	0	1	1	6	2	1	0	1	0	2	0	0
OTU_97.450	4	0	0	0	0	0	0	0	0	0	0	0	0	4	0	1	0	4	1	0	3	1	0	1	0	3	3	0	1	0	1	0	0	0	0	2	0	5	0	1	2	0	1	0	0	0	1	0	2
OTU_97.96	0	0	0	0	0	0	0	0	0	0	0	0	1	4	4	0	0	0	0	0	0	0	0	1	0	0	0	0	3	0	0	0	0	0	0	0	0	3	0	0	0	0	0	0	0	1	0	0	0
OTU_97.34	2	0	0	0	1	0	1	1	0	0	0	0	2	9	2	12	5	1	0	0	0	0	0	0	6	1	2	2	1	0	1	0	0	0	2	0	1	0	0	0	6	0	2	0	0	7	3	0	0
OTU_97.27	2	0	0	0	3	0	0	0	0	0	0	0	5	2	7	20	0	0	0	0	0	0	0	0	0	0	0	0	2	2	0	1	1	0	2	0	1	0	0	1	0	0	0	0	0	8	8	0	3
OTU_97.294	7	0	1	1	1	0	1	3	0	0	0	0	1	0	1	0	0	0	0	0	0	0	0	0	0	0	0	1	4	0	0	0	0	0	4	1	4	1	0	3	0	1	0	0	0	2	0	0	0
OTU_97.38	0	124	0	0	0	0	0	0	0	0	0	0	1	3	0	0	0	0	0	0	0	0	0	0	2	0	0	0	0	0	0	0	1	0	0	0	0	0	0	0	0	0	0	0	0	2	3	0	0
OTU_97.633	2	0	0	0	0	0	0	0	0	0	0	0	2	1	5	1	0	0	0	0	0	0	0	0	0	0	0	0	5	0	0	0	0	0	1	0	2	2	1	0	1	0	0	0	0	1	0	0	0
OTU_97.208	4	1	0	0	4	2	3	0	2	1	4	0	2	1	0	0	0	1	2	2	1	1	1	0	1	3	0	0	1	2	0	0	0	0	1	1	0	0	0	0	4	0	1	0	0	0	1	0	0
OTU_97.582	0	0	6	0	7	0	1	3	0	2	0	1	17	3	5	0	6	1	1	0	11	1	24	10	0	0	0	6	0	1	8	0	0	0	2	16	0	0	0	3	8	2	0	5	8	2	0	0	0
OTU_97.394	3	0	1	3	0	3	0	0	0	0	0	0	0	0	0	1	0	0	0	4	0	0	0	0	0	2	1	0	0	1	0	0	0	1	0	4	0	7	2	1	0	0	2	0	0	0	1	0	1
OTU_97.47	9	4	1	0	0	0	0	2	0	8	1	11	4	0	4	3	0	0	3	4	23	25	0	0	2	7	0	0	0	0	9	0	1	0	1	2	0	0	0	4	0	3	0	0	1	0	0	0	0
OTU_97.480	0	0	0	0	0	1	0	1	0	0	0	2	1	0	0	0	0	0	0	0	0	0	1	0	0	0	0	1	0	1	1	3	0	0	2	0	1	5	4	1	0	3	0	0	1	2	0	0	1
OTU_97.667	2	0	0	0	0	0	0	0	0	0	0	0	2	1	8	6	0	0	0	1	0	0	0	0	0	0	0	1	52	3	0	0	0	0	0	0	1	0	0	0	0	0	0	0	0	0	3	0	0
OTU_97.594	1	0	0	0	0	0	0	0	2	0	0	0	1	0	0	0	0	0	0	0	0	0	0	0	0	0	0	0	1	0	0	1	0	0	3	0	4	2	0	0	0	1	0	0	0	0	1	0	0
OTU_97.64	0	4	0	0	2	0	0	0	0	0	0	0	0	1	3	10	0	0	0	0	0	1	0	0	0	0	0	2	1	0	0	0	0	0	0	0	2	0	0	0	0	1	0	0	0	0	0	0	0
OTU_97.212	0	0	1	0	3	3	0	3	0	3	0	0	5	7	0	0	2	6	1	2	4	0	0	1	0	1	0	0	0	0	2	8	0	0	0	3	2	0	0	2	0	0	6	0	0	2	1	0	0
OTU_97.391	2	1	2	0	0	2	0	2	1	0	1	2	2	0	0	0	5	3	1	4	0	7	5	2	1	0	2	0	0	81	2	60	0	4	0	22	0	2	0	1	1	3	69	2	24	0	2	3	0
OTU_97.31	0	5	0	0	2	26	0	59	0	15	12	120	12	2	1	4	33	2	38	8	0	0	2	3	36	1	2	1	0	0	0	0	1	61	5	53	2	5	12	3	4	0	3	0	19	2	71	0	0
OTU_97.45	11	53	1	0	0	0	0	0	0	0	0	0	1	9	3	1	0	0	0	0	0	0	0	1	0	1	1	0	0	0	0	0	0	0	0	0	1	1	0	0	0	0	0	0	2	1	3	0	1
OTU_97.58	0	12	1	1	0	0	0	0	0	0	0	0	1	3	0	0	0	0	0	0	0	0	0	0	0	0	0	0	0	5	0	0	0	0	0	0	0	0	0	0	0	0	0	0	0	1	0	0	0
OTU_97.178	3	1	0	0	1	1	3	0	1	0	0	0	2	4	1	9	0	0	0	0	0	0	0	0	0	0	1	1	11	0	0	0	0	0	3	2	8	1	0	1	0	0	0	0	1	1	0	0	4
OTU_97.247	3	2	0	0	0	0	0	1	0	0	0	0	0	0	5	3	0	0	0	0	0	0	0	0	0	0	0	0	2	1	0	0	0	0	1	0	4	0	0	0	0	0	0	0	0	0	0	0	0
OTU_97.499	5	0	0	0	18	31	0	3	0	0	3	3	4	0	0	0	15	3	0	2	3	0	0	0	48	0	0	0	0	0	6	18	0	1	3	0	0	2	1	0	0	3	0	0	0	0	2	0	1
OTU_97.642	6	0	0	0	0	0	0	0	0	0	0	0	0	2	7	2	0	0	0	0	0	0	0	0	0	0	0	2	11	0	0	0	0	0	1	0	0	3	0	0	0	0	0	0	0	0	2	0	0
OTU_97.643	1	0	2	0	7	3	0	5	1	1	2	0	9	2	0	0	7	2	1	1	0	1	0	2	2	0	2	1	0	1	3	13	0	2	1	3	0	0	0	4	0	0	4	1	1	0	0	0	0
OTU_97.442	1	0	3	0	3	1	1	4	0	0	3	0	12	2	1	0	1	4	3	1	2	1	2	0	4	0	3	1	0	0	3	6	0	1	1	5	0	0	2	4	0	0	2	0	1	2	0	0	0
OTU_97.55	2	7	0	0	3	1	0	2	0	1	0	2	0	0	1	1	0	0	0	1	0	3	0	0	0	0	1	0	0	0	0	0	1	1	0	0	0	5	0	0	0	0	0	0	0	1	3	0	0
OTU_97.598	1	0	0	0	0	0	0	0	0	0	1	0	0	1	0	0	0	0	0	1	0	0	0	0	0	0	0	3	1	0	0	0	0	0	1	0	0	2	0	1	1	0	0	0	0	1	0	0	1
OTU_97.36	8	0	6	0	4	31	4	12	1	1	11	19	11	0	0	0	33	3	5	19	7	10	0	0	11	5	5	0	0	0	0	0	0	11	7	0	0	5	9	1	1	12	0	2	46	0	1	1	0
OTU_97.556	4	0	1	7	2	1	5	0	27	0	1	3	2	0	0	0	0	2	1	1	0	3	0	1	1	0	3	1	1	0	1	1	1	4	0	1	0	0	21	14	0	4	0	4	0	0	0	1	388
OTU_97.662	0	0	2	3	1	3	1	1	0	0	0	12	19	11	2	2	1	0	0	1	1	0	1	3	0	0	0	3	1	1	0	2	0	2	5	2	4	2	0	0	0	0	0	1	1	1	8	0	3
OTU_97.67	0	2	0	0	0	0	0	0	0	0	1	0	6	1	0	0	0	2	0	0	0	0	0	0	0	0	0	1	1	0	1	0	0	1	2	0	0	1	0	0	0	3	0	0	0	2	3	0	0
OTU_97.79	2	0	1	0	0	11	0	1	0	0	1	0	0	4	0	0	1	1	0	0	0	3	0	0	0	1	0	1	0	0	4	0	0	0	3	1	1	0	1	0	0	0	0	0	0	6	0	0	12
OTU_97.26	45	0	0	0	0	0	3	0	5	0	0	0	1	1	0	0	0	0	0	0	0	0	0	0	1	2	1	5	4	0	1	0	0	0	1	1	2	2	1	1	0	0	0	0	0	5	0	0	0
OTU_97.46	4	5	0	0	3	0	1	0	0	0	0	0	2	5	8	38	0	0	0	0	6	0	0	0	0	0	0	0	0	0	1	1	0	0	0	0	0	7	0	0	0	0	0	0	0	3	3	0	1
OTU_97.233	1	0	0	0	0	14	0	2	0	5	0	1	0	1	1	0	1	0	3	5	22	11	0	0	4	0	1	2	0	0	0	0	0	1	0	0	0	8	0	1	0	1	0	8	0	1	2	0	0
OTU_97.342	0	0	3	1	0	1	1	0	5	0	0	1	8	6	7	0	0	1	0	0	2	0	6	2	0	0	0	0	0	0	2	1	0	1	0	0	0	0	2	0	1	0	0	4	1	2	0	0	1
OTU_97.473	0	1	0	0	0	0	2	1	1	0	0	0	0	1	0	0	0	0	6	0	0	2	2	0	0	1	0	6	12	0	0	0	0	0	0	2	0	0	0	3	0	0	0	0	0	0	0	0	0
OTU_97.74	4	2	0	1	0	0	0	2	1	0	0	0	2	14	5	6	0	0	0	0	0	0	0	0	0	0	0	2	14	0	0	1	0	0	1	0	19	7	0	0	1	0	0	0	0	7	2	0	0
OTU_97.49	4	1	6	0	0	4	0	0	0	1	0	0	5	13	1	1	0	29	1	0	1	1	0	0	0	2	9	0	0	0	0	1	1	1	0	1	0	0	0	2	0	0	0	0	0	0	0	0	0
OTU_97.61	3	1	21	1	5	1	0	2	0	0	1	22	1	1	0	0	0	5	1	5	4	0	2	0	1	4	0	1	0	0	0	1	0	2	0	0	2	3	4	5	0	3	0	32	2	0	0	0	2
OTU_97.639	0	21	0	0	0	0	0	1	0	0	0	0	0	6	1	18	0	0	0	0	0	0	1	0	0	0	3	0	0	0	0	0	0	0	1	0	1	0	0	0	0	0	0	0	0	4	9	0	1
OTU_97.562	1	0	1	0	0	0	0	0	0	0	0	0	0	1	0	0	0	0	0	0	0	0	0	0	0	0	0	0	2	0	0	0	0	0	0	0	0	1	0	0	0	0	0	0	0	1	0	0	4
OTU_97.402	0	0	0	0	0	0	0	0	0	0	0	0	0	1	0	0	0	0	0	0	0	0	0	0	0	0	0	1	2	0	0	0	0	0	1	0	0	1	0	1	0	0	0	0	1	1	0	0	2
OTU_97.139	2	0	1	0	0	0	0	0	0	0	0	0	0	1	0	1	0	0	0	0	0	0	0	0	0	0	0	0	1	0	0	0	0	0	0	0	0	1	0	0	0	0	1	0	0	0	0	0	9
OTU_97.62	3	1	0	0	1	0	1	0	0	0	0	0	1	5	0	4	0	0	0	0	0	0	0	0	0	0	0	0	0	0	0	0	0	0	0	0	2	1	0	0	0	0	0	0	0	2	3	0	0
OTU_97.48	0	10	0	0	3	0	0	0	0	0	0	0	6	6	7	31	0	0	0	0	0	0	0	0	0	0	0	0	0	0	3	1	0	0	0	1	3	2	0	1	0	0	0	0	0	5	4	0	0
OTU_97.551	1	0	1	3	5	5	0	3	0	3	1	2	0	1	1	1	2	1	0	0	4	6	4	4	3	0	8	0	0	3	8	1	2	1	2	2	0	0	0	1	0	13	4	0	1	0	2	6	0
OTU_97.101	0	0	0	0	1	0	0	7	0	2	4	1	3	0	0	0	3	5	0	30	4	2	0	0	0	2	0	0	3	0	0	6	0	3	0	1	0	2	1	4	0	0	0	0	0	0	1	0	0
OTU_97.290	0	0	2	0	1	0	0	0	0	1	1	0	0	0	0	0	0	0	1	0	0	1	3	0	0	1	1	0	0	0	0	1	1	0	0	4	0	0	0	0	0	1	1	5	0	0	0	1	0
OTU_97.51	5	0	1	0	0	17	0	0	0	0	0	15	4	2	0	0	0	0	0	0	0	0	0	0	0	0	0	0	0	0	1	0	0	0	1	1	0	1	6	0	0	0	0	0	0	22	7	0	0
OTU_97.467	0	1	0	0	0	0	0	0	0	0	0	2	1	0	3	5	0	0	0	0	0	0	0	0	0	2	0	1	16	16	0	0	0	0	1	0	1	0	0	0	0	0	1	0	0	0	3	0	0
OTU_97.72	2	2	0	0	0	0	0	0	0	0	0	0	2	1	0	1	0	0	0	0	0	0	0	0	0	0	0	0	1	0	0	0	0	0	1	0	0	9	0	0	0	0	0	0	0	0	0	0	1
OTU_97.333	1	0	1	0	0	1	0	0	0	0	0	1	5	0	1	0	1	1	0	0	0	0	0	1	0	1	0	0	0	1	1	5	0	0	0	6	1	0	0	0	0	0	2	0	0	0	0	0	0
OTU_97.611	3	0	0	0	0	0	0	0	0	0	0	0	2	3	0	0	0	0	0	0	0	0	0	0	0	0	1	0	1	0	0	0	0	0	2	0	0	1	0	0	3	0	0	0	0	0	0	0	6
OTU_97.86	2	0	1	0	0	1	0	0	0	1	0	0	0	0	0	0	3	0	0	0	1	1	0	0	0	1	0	0	0	0	0	0	0	0	0	1	1	10	2	0	0	0	0	0	0	0	0	0	0
OTU_97.118	3	1	1	0	2	12	0	5	0	4	8	1	1	0	0	0	11	2	3	0	9	6	0	1	8	2	4	0	0	0	0	8	0	3	0	4	2	0	5	1	2	2	1	0	3	0	1	1	0
OTU_97.39	5	0	8	0	5	0	109	0	1	0	10	23	26	1	0	0	0	5	82	14	7	3	1	2	0	0	8	0	0	0	8	3	1	0	0	6	1	0	0	1	0	1	1	13	2	0	0	66	0
OTU_97.476	1	0	3	0	2	3	0	2	0	0	2	1	6	0	0	0	2	0	0	1	0	1	2	1	0	0	1	3	0	0	2	22	0	0	2	18	0	0	0	4	0	0	18	0	2	1	0	1	0
OTU_97.63	1	6	0	0	0	0	0	1	0	0	0	0	2	0	0	0	1	0	0	1	0	0	1	0	1	0	0	0	0	0	0	0	0	0	2	0	1	0	1	2	0	0	0	0	0	0	0	0	0
OTU_97.103	0	3	0	1	1	2	0	0	0	0	0	0	1	1	0	0	0	0	0	2	0	0	1	0	0	0	0	1	0	39	0	0	0	2	0	0	2	0	0	0	0	1	0	0	1	0	0	0	0
OTU_97.227	4	0	1	0	0	0	5	2	9	0	0	0	0	0	0	0	1	3	2	2	0	0	0	0	0	0	0	0	0	1	0	0	0	0	1	0	1	0	0	1	4	0	0	0	0	1	0	2	0
OTU_97.91	0	0	2	0	1	2	4	0	2	2	0	11	1	0	0	0	0	0	0	0	1	0	0	0	0	0	0	1	0	1	1	1	0	2	1	1	0	5	4	3	0	0	0	1	0	0	0	0	1
OTU_97.109	2	5	0	0	0	7	0	1	0	0	1	0	5	2	0	0	1	0	0	0	0	0	0	0	0	0	0	0	0	2	0	0	0	0	0	2	0	0	1	2	0	0	0	0	0	0	0	0	0
OTU_97.215	1	0	1	0	0	0	1	0	0	0	0	0	0	0	0	0	0	1	0	1	0	0	0	0	0	0	0	0	0	3	0	0	0	0	0	1	1	0	0	0	0	0	0	1	1	0	0	1	0
OTU_97.40	1	0	0	0	0	0	1	1	0	0	0	0	5	17	1	0	0	1	0	0	0	0	1	0	0	0	0	1	0	0	0	3	0	0	0	0	3	1	0	4	0	0	0	0	0	1	0	0	0
OTU_97.464	92	0	0	0	2	0	2	1	1	0	0	0	0	2	0	0	0	0	0	0	0	0	0	0	1	0	1	1	8	0	0	0	0	0	1	5	1	2	0	5	0	0	0	0	0	0	0	0	0
OTU_97.107	0	0	0	0	2	1	0	1	1	3	0	0	0	0	0	0	0	1	0	0	1	0	1	1	4	0	0	0	0	1	0	0	0	1	1	0	2	1	0	1	18	0	0	0	119	0	0	0	0
OTU_97.114	1	0	0	1	0	2	0	0	1	0	1	1	0	1	0	0	0	1	4	1	3	3	0	1	0	1	1	0	0	0	0	0	0	1	1	0	0	3	0	0	0	1	0	3	1	2	2	0	0
OTU_97.210	0	0	0	0	0	0	5	2	4	0	0	0	0	0	0	0	0	2	4	4	0	0	0	1	0	1	5	1	0	0	0	6	1	2	0	0	2	0	1	0	6	3	0	1	0	0	0	3	0
OTU_97.352	0	1	0	0	0	8	0	0	1	4	0	1	0	1	2	0	0	0	2	0	11	4	1	1	4	0	0	1	0	0	0	0	0	0	1	0	0	1	0	0	0	2	0	3	0	2	0	0	1
OTU_97.620	2	0	4	0	0	0	0	0	0	4	0	0	1	3	0	2	0	0	2	0	1	0	0	0	0	0	0	0	3	1	0	0	0	0	0	0	0	11	1	1	0	0	0	1	0	0	0	1	0
OTU_97.85	9	1	1	0	0	1	0	0	0	0	0	7	1	0	0	0	0	1	1	6	0	0	0	0	0	1	0	3	0	0	6	3	2	1	0	3	4	2	1	1	0	0	0	0	0	0	0	1	1
OTU_97.268	7	0	0	0	0	0	0	6	0	0	0	0	4	0	0	0	0	0	0	0	0	0	0	0	0	0	0	0	0	0	0	0	0	0	0	4	0	0	0	0	0	0	0	0	0	0	0	0	2
OTU_97.299	2	0	2	0	9	10	0	5	0	1	4	2	2	0	0	0	6	0	0	0	4	4	0	1	0	0	0	0	0	1	5	6	0	0	2	15	1	0	0	2	0	0	2	1	1	0	0	0	0
OTU_97.501	1	0	0	0	0	1	0	0	1	0	0	2	0	0	0	0	0	0	0	0	0	0	0	0	0	0	0	0	0	1	1	0	1	1	4	1	0	3	0	0	0	0	0	0	0	2	1	0	5
OTU_97.163	0	0	3	0	1	4	0	2	0	10	3	2	1	0	0	0	6	8	8	3	16	1	1	0	5	2	1	0	0	0	0	7	0	6	1	6	3	3	1	1	0	0	0	0	11	0	3	0	0
OTU_97.29	0	0	0	1	4	0	0	0	0	0	0	0	2	11	0	10	0	0	0	2	0	0	0	0	0	0	0	0	2	0	0	0	0	0	0	0	1	14	0	0	0	0	0	0	0	1	0	0	0
OTU_97.313	13	0	0	0	4	6	1	0	0	13	10	0	9	0	0	0	12	3	4	3	0	129	29	30	1	1	37	2	0	0	301	0	0	4	3	24	0	0	2	8	0	0	0	0	8	0	2	0	0
OTU_97.81	0	0	0	0	1	0	0	0	0	0	0	1	0	0	0	0	0	1	0	0	0	0	0	0	0	1	1	0	0	0	0	0	0	0	2	0	0	0	0	0	0	0	0	0	0	0	2	0	4
OTU_97.577	0	0	0	0	0	0	0	1	0	0	0	0	2	4	2	0	0	0	0	0	1	0	2	0	0	0	1	0	1	0	0	0	0	0	0	1	0	0	0	0	0	0	0	0	0	2	0	0	8
OTU_97.59	0	2	1	0	0	5	0	0	0	2	0	6	3	1	0	0	7	0	0	1	0	7	1	0	4	0	1	4	1	14	6	36	0	1	2	33	0	2	0	4	1	3	28	1	3	0	1	1	0
OTU_97.261	2	7	0	0	6	0	1	0	0	0	0	0	1	22	35	44	0	0	1	0	0	0	0	0	0	0	1	0	3	0	0	0	0	0	2	0	7	19	0	0	0	0	0	0	0	13	19	0	0
OTU_97.65	1	0	2	0	0	23	0	0	0	0	0	3	0	0	0	0	9	1	1	1	0	1	0	0	0	0	0	0	0	0	2	0	0	0	0	1	0	0	1	0	0	0	0	0	1	8	0	0	0
OTU_97.226	1	0	0	0	0	0	0	0	0	0	0	0	2	2	0	0	0	0	0	0	0	0	0	0	0	0	1	0	2	0	1	0	0	0	0	0	0	2	0	0	0	0	0	0	0	0	0	0	0
OTU_97.23	0	0	0	0	0	0	0	0	0	3	0	0	0	0	0	0	0	0	19	2	1	1	0	0	4	71	0	0	0	0	0	0	0	0	3	0	0	0	2	4	1	1	0	0	0	1	0	65	0
OTU_97.418	0	0	0	0	0	0	0	0	0	0	0	0	3	3	3	10	0	1	0	0	1	0	0	0	0	0	0	0	2	0	0	1	0	0	1	0	0	4	0	0	0	0	0	0	0	3	1	0	0
OTU_97.344	3	0	0	0	0	0	0	1	0	2	0	0	2	0	0	1	1	0	1	1	3	0	0	2	1	1	0	2	0	0	1	1	0	0	1	9	0	0	1	0	1	0	0	0	1	0	0	0	0
OTU_97.461	0	1	0	0	0	0	3	0	2	0	0	0	0	1	0	0	0	3	0	1	0	0	0	0	0	1	1	0	0	3	0	0	1	0	0	0	3	0	1	1	3	1	0	0	0	0	0	0	0
OTU_97.78	0	0	0	1	0	1	0	0	0	0	0	16	0	0	0	0	2	2	0	1	0	0	1	0	1	0	0	0	0	0	2	0	0	0	0	0	0	13	5	2	0	0	0	0	1	0	0	0	4
OTU_97.89	1	0	2	0	0	10	1	0	1	0	0	9	1	1	0	1	0	0	0	0	0	0	0	0	0	0	0	0	0	0	1	0	0	0	7	1	1	2	27	5	0	0	0	0	1	0	0	0	1
OTU_97.232	5	0	0	0	0	1	0	0	0	0	0	0	2	0	0	0	2	2	0	0	1	0	0	0	1	0	4	0	0	0	0	0	0	0	0	2	0	0	0	1	0	0	0	0	0	0	1	3	1
OTU_97.460	0	0	0	0	0	0	0	0	0	0	0	0	0	1	1	0	0	0	0	0	0	0	0	0	0	0	0	0	0	0	0	0	0	0	0	0	0	0	0	0	0	0	0	0	0	5	0	0	1
OTU_97.596	2	0	0	1	1	3	0	3	1	1	0	3	0	0	0	0	0	2	1	1	1	7	1	1	1	1	2	1	0	1	5	1	0	0	0	2	2	0	0	2	1	10	2	0	0	0	0	1	0
OTU_97.182	13	0	13	16	7	0	3	0	2	4	0	1	0	6	0	0	0	1	0	1	0	1	1	0	1	0	0	0	0	0	0	0	0	0	6	0	0	3	0	0	0	2	0	17	1	1	0	1	2
OTU_97.482	0	0	0	0	0	0	0	0	0	0	0	0	1	4	2	2	0	0	0	0	0	0	1	0	0	2	1	0	1	0	0	0	0	0	0	0	1	3	0	0	0	0	0	0	0	2	2	0	0
OTU_97.192	0	0	0	0	0	0	11	0	3	2	1	0	0	0	0	0	0	1	2	4	1	0	0	0	0	0	0	0	0	2	1	0	3	0	0	0	1	0	0	0	3	1	0	0	0	0	0	2	11
OTU_97.515	1	0	0	1	0	0	4	1	6	4	1	2	2	0	0	0	0	0	8	6	1	0	0	0	1	0	2	0	0	0	1	0	0	1	1	0	2	0	1	4	0	1	0	0	0	0	0	0	27
OTU_97.117	0	1	1	1	0	0	0	0	0	1	4	4	3	0	0	0	0	1	0	1	0	0	0	0	0	0	0	4	2	0	0	4	0	4	0	0	2	1	3	1	0	0	0	0	0	0	0	0	0
OTU_97.336	0	0	2	0	10	3	0	4	0	1	2	0	3	0	0	0	4	0	0	0	4	0	2	3	1	0	0	0	0	1	4	2	0	0	4	14	0	0	2	2	0	0	4	0	0	1	1	0	0
OTU_97.404	2	0	0	0	0	2	0	0	0	1	0	2	0	0	0	0	0	2	1	0	3	2	0	0	2	0	1	0	0	0	0	0	0	0	0	0	0	3	0	1	0	0	1	5	0	0	1	0	1
OTU_97.106	1	0	2	1	0	1	0	2	0	1	2	1	0	0	0	0	0	0	0	4	2	2	1	1	2	0	17	0	0	0	0	0	0	2	0	0	0	0	0	4	0	17	2	0	0	1	0	0	0
OTU_97.147	1	0	0	0	0	0	0	0	0	3	0	4	1	0	0	0	0	0	0	0	1	0	0	0	0	0	0	0	0	0	0	1	1	0	0	0	0	0	0	0	1	2	2	0	0	1	0	0	0
OTU_97.298	0	0	0	0	1	0	0	0	0	0	0	0	0	1	0	1	0	1	1	0	0	0	0	0	0	1	0	0	0	0	0	0	0	0	0	0	0	1	0	0	0	0	0	0	0	0	1	0	0
OTU_97.406	1	0	3	2	4	0	4	0	2	4	0	2	2	0	0	0	0	2	3	3	0	0	8	2	0	0	0	0	0	0	0	1	1	1	1	0	0	0	0	1	0	1	0	1	0	0	0	0	5
OTU_97.80	0	0	1	0	0	0	0	0	0	0	0	2	2	0	0	0	0	0	0	0	0	0	0	0	0	1	0	0	0	1	1	0	3	2	0	1	0	2	0	0	0	0	0	1	0	1	0	0	0
OTU_97.426	0	0	0	3	1	0	0	0	1	0	0	1	4	3	0	0	0	1	0	0	0	0	2	2	0	0	0	1	1	0	0	0	1	0	0	0	1	1	1	1	2	0	0	2	0	0	0	0	2
OTU_97.205	2	0	1	2	0	0	2	0	0	0	1	0	0	0	0	0	0	0	0	0	0	0	1	0	2	0	0	0	0	0	0	0	0	2	0	1	1	0	0	5	0	0	0	0	0	16	0	0	14
OTU_97.327	2	13	0	1	4	0	3	1	0	0	0	0	1	6	35	30	0	0	0	0	0	1	0	0	0	1	0	1	0	0	1	0	0	0	0	0	3	8	0	0	0	0	0	0	0	0	9	0	0
OTU_97.432	0	0	0	0	0	0	0	0	0	0	0	1	2	0	0	1	0	0	0	0	0	0	0	0	0	0	0	0	0	1	0	0	0	1	0	0	0	0	1	0	1	0	0	0	0	0	0	0	0
OTU_97.543	1	0	0	0	0	0	0	0	0	0	0	0	0	1	1	0	0	0	0	0	0	0	0	0	0	0	0	1	1	0	0	0	0	0	0	0	0	0	0	0	0	0	0	0	0	0	0	0	0
OTU_97.111	0	2	0	0	0	0	0	0	0	0	1	0	1	0	0	0	0	0	0	0	0	0	0	0	0	0	0	0	0	0	1	0	0	0	0	0	0	0	0	0	0	0	0	0	0	0	0	0	0
OTU_97.57	0	38	0	0	0	0	0	0	0	0	0	0	0	4	0	0	0	0	0	0	0	0	0	0	0	0	0	1	0	3	0	0	0	0	1	0	0	0	0	0	0	0	0	0	0	1	2	0	0
OTU_97.671	3	0	0	0	0	0	0	0	0	0	0	0	0	3	0	0	0	0	0	0	0	0	0	0	0	0	1	1	2	0	0	0	0	0	1	1	0	0	0	0	0	0	0	0	0	2	0	0	2
OTU_97.248	0	0	0	0	0	0	0	0	0	0	1	0	0	0	0	0	0	0	0	0	0	0	0	1	0	0	0	0	0	0	0	2	0	0	0	0	0	4	0	0	0	0	0	1	0	0	0	0	0
OTU_97.606	3	0	1	1	2	1	0	0	0	2	1	2	0	0	0	0	1	1	0	0	1	1	2	4	1	1	1	0	0	0	1	0	0	3	2	0	0	2	0	0	1	1	1	0	2	0	0	1	0
OTU_97.157	1	0	0	0	0	5	0	1	0	5	1	1	3	0	2	0	0	1	0	0	3	0	3	0	0	0	0	0	0	0	0	0	0	0	3	0	0	1	5	4	0	0	0	4	0	1	0	1	1
OTU_97.554	1	0	0	0	0	0	0	0	1	3	0	0	1	2	0	0	0	1	0	0	0	0	1	0	0	1	6	0	2	0	0	0	0	0	2	2	0	0	0	0	2	4	0	0	0	0	0	0	2
OTU_97.99	0	2	0	0	2	0	0	1	0	0	1	0	2	4	0	0	2	0	0	0	0	0	0	0	0	0	0	0	0	1	0	1	0	0	0	0	0	0	0	0	0	1	0	2	0	3	1	0	1
OTU_97.115	7	0	0	3	0	0	0	2	0	2	0	1	1	2	0	0	0	0	2	14	0	0	0	0	1	0	2	0	1	0	3	1	0	1	0	0	0	2	1	3	0	0	0	1	0	0	0	0	1
OTU_97.326	3	0	0	0	0	3	5	0	0	8	0	0	0	1	0	0	0	0	12	3	0	1	0	0	2	0	0	0	2	0	0	0	0	2	1	3	0	0	1	0	0	4	0	0	1	4	0	2	0
OTU_97.534	0	0	0	0	0	0	1	1	0	0	0	1	0	5	0	0	0	0	1	0	0	0	0	0	0	0	0	0	2	1	0	2	0	0	2	1	4	0	1	1	0	0	0	2	0	1	1	0	0
OTU_97.54	0	0	1	0	13	1	0	3	0	5	11	0	3	0	0	0	3	0	2	0	5	0	0	0	0	0	0	0	0	0	1	0	0	0	0	1	0	0	0	0	0	0	0	1	0	0	0	0	0
OTU_97.126	0	0	0	2	0	1	0	1	0	0	0	1	1	0	1	0	0	0	1	9	0	1	0	0	1	0	0	1	0	0	0	0	0	0	0	0	0	13	1	7	0	0	0	0	0	0	0	0	0
OTU_97.131	1	0	0	0	0	0	0	2	0	0	4	0	0	0	0	0	0	0	3	26	0	0	0	0	2	0	0	4	0	0	1	0	0	4	0	0	0	0	0	1	0	7	0	0	0	1	0	0	0
OTU_97.153	16	0	0	0	0	0	0	0	1	0	0	0	0	0	0	0	0	0	0	0	0	0	0	0	0	0	0	3	4	0	0	0	0	0	0	4	0	0	0	2	0	0	0	0	0	0	0	0	0
OTU_97.346	0	0	0	0	0	0	0	0	0	0	0	0	0	1	0	0	0	0	0	0	0	0	0	0	1	0	0	0	2	0	0	0	0	0	0	1	0	1	1	0	0	0	0	0	0	0	1	0	0
OTU_97.348	0	0	1	0	0	0	0	0	0	0	0	0	0	0	0	0	0	0	0	0	0	0	0	0	0	1	0	0	0	2	0	0	0	0	0	0	2	0	0	0	0	0	0	0	0	0	0	0	0
OTU_97.477	0	0	0	0	0	0	1	0	1	0	0	0	0	0	0	0	0	1	0	0	0	0	0	0	0	0	0	0	0	4	0	0	0	0	0	0	0	0	0	0	2	0	0	0	0	0	1	0	0
OTU_97.249	0	0	0	0	0	0	0	0	0	0	0	0	0	2	0	2	0	0	0	0	0	0	0	0	0	0	0	23	30	0	0	1	0	0	1	1	2	2	0	0	0	0	0	0	1	3	2	0	0
OTU_97.127	0	0	0	0	0	3	1	1	0	16	0	1	1	0	0	0	1	0	1	0	0	10	2	4	0	5	0	0	0	0	6	0	2	0	2	8	0	0	0	0	0	0	0	0	1	0	0	1	0
OTU_97.269	2	0	0	0	4	3	0	0	0	1	8	2	2	0	0	0	4	0	3	5	0	18	9	4	2	0	6	1	0	0	66	2	0	1	0	17	0	1	1	3	0	0	0	0	2	0	1	0	0
OTU_97.459	0	2	0	0	2	0	0	0	0	1	0	0	0	2	0	2	0	0	0	0	0	0	0	0	0	0	0	0	0	0	0	0	0	0	1	0	0	0	0	0	0	0	0	0	0	3	1	0	1
OTU_97.471	4	0	6	1	0	0	0	1	2	1	0	0	0	0	0	0	0	0	0	0	0	0	0	0	2	0	0	1	0	1	1	1	0	0	2	0	2	5	1	0	0	0	0	4	1	0	0	0	8
OTU_97.619	1	0	0	0	0	1	0	0	1	0	0	0	2	1	0	0	3	2	2	0	1	1	4	3	0	1	0	3	0	0	0	3	0	0	0	1	0	0	0	1	0	0	2	0	0	0	0	0	1
OTU_97.75	3	3	1	0	0	1	0	1	0	0	0	17	0	2	2	1	1	0	0	0	0	3	0	0	0	0	0	0	0	0	0	0	1	1	1	1	0	125	1	0	0	0	0	0	0	0	0	0	0
OTU_97.105	2	2	0	0	0	2	0	0	0	1	0	0	0	0	0	0	0	0	0	0	1	1	0	0	2	0	0	2	0	0	0	0	0	0	0	0	0	0	0	1	0	0	0	0	0	0	0	0	0
OTU_97.195	0	1	1	0	0	0	0	0	1	0	0	4	8	1	0	0	0	0	0	2	0	0	0	0	0	0	0	0	1	0	1	0	0	0	0	1	0	1	0	0	0	0	0	4	4	0	0	0	0
OTU_97.235	3	3	0	0	0	0	0	0	0	0	0	0	3	1	0	1	0	0	1	0	0	0	0	0	0	0	0	0	0	0	0	4	0	0	0	0	4	2	0	0	0	0	0	1	0	2	0	0	0
OTU_97.133	0	2	0	0	2	2	0	1	0	1	0	2	1	2	2	0	0	0	0	0	0	0	0	0	1	2	0	0	1	0	0	0	0	0	1	0	1	8	0	0	0	0	0	0	0	0	1	0	1
OTU_97.137	0	0	4	0	3	1	0	2	0	1	0	0	0	0	0	0	0	0	1	1	0	0	2	1	1	0	0	0	0	0	0	1	0	0	0	3	0	0	0	0	1	0	3	0	5	0	0	0	0
OTU_97.229	0	0	0	7	0	0	0	0	0	0	0	0	6	5	1	0	0	4	0	0	1	0	8	0	0	0	0	0	0	0	0	0	1	0	1	1	0	0	3	0	1	0	0	1	1	0	0	0	0
OTU_97.280	0	0	5	0	0	4	2	2	0	0	4	3	17	0	0	0	9	0	2	6	8	2	0	0	4	1	1	0	0	0	0	0	0	1	2	0	0	0	2	0	0	2	0	0	5	0	0	0	0
OTU_97.329	0	0	0	0	0	0	0	0	0	0	0	0	0	0	0	1	0	0	0	0	0	0	0	0	0	0	0	0	1	2	0	0	0	0	0	0	0	0	0	0	0	0	0	0	0	0	1	0	0
OTU_97.252	5	0	2	1	0	1	0	1	1	2	0	0	0	0	0	0	0	0	0	1	0	0	0	2	0	0	0	0	0	1	0	0	0	0	4	0	1	3	3	0	0	0	0	1	1	0	0	0	2
OTU_97.277	0	1	0	0	2	0	0	2	0	1	0	0	0	0	0	0	0	0	1	0	1	0	0	0	2	2	5	0	0	1	0	0	0	0	0	1	0	1	1	0	0	0	0	2	1	0	0	3	0
OTU_97.35	3	1	5	0	2	7	0	5	0	16	1	0	8	0	0	0	0	0	22	2	0	0	0	0	0	0	1	0	0	0	0	0	0	2	0	2	0	0	6	13	0	0	0	1	1	0	0	1	0
OTU_97.495	1	0	2	0	0	0	0	0	0	0	1	0	2	1	2	0	1	3	2	1	0	0	0	0	0	0	0	0	0	0	0	2	0	0	0	1	0	0	3	0	0	0	0	0	0	1	0	0	0
OTU_97.579	2	0	0	1	2	0	1	0	0	0	0	0	3	0	0	0	0	0	0	0	0	0	0	0	0	0	0	0	0	0	0	1	0	0	0	0	0	0	0	1	0	1	0	1	0	1	0	0	2
OTU_97.590	0	0	0	0	0	1	0	0	0	5	0	0	5	0	0	0	1	3	0	7	0	0	1	0	30	0	0	117	0	1	1	4	1	0	7	167	2	0	0	0	32	11	2	0	1	9	0	0	0
OTU_97.625	1	0	2	0	5	11	6	1	0	11	1	0	9	0	0	0	0	1	14	4	4	0	0	0	1	0	6	0	0	0	0	0	0	3	0	3	0	0	8	35	0	0	0	0	0	0	0	1	0
OTU_97.669	0	0	1	1	0	0	0	1	0	0	0	0	1	0	0	0	0	2	0	5	0	0	1	0	0	0	0	1	0	0	1	0	0	0	1	0	0	2	0	0	0	0	0	2	0	0	0	0	0
OTU_97.68	0	0	0	0	0	0	0	0	0	0	1	1	0	0	0	0	0	0	0	1	0	0	0	0	0	0	0	21	1	0	0	1	0	0	0	0	0	5	0	0	0	0	0	0	0	1	1	0	0
OTU_97.180	0	1	0	0	0	0	2	0	0	0	2	0	0	0	0	0	0	0	0	0	1	1	1	1	0	1	1	1	0	0	0	0	1	0	1	0	1	0	0	0	0	2	3	0	3	0	4	0	0
OTU_97.87	0	0	0	0	0	0	0	0	0	0	0	1	0	0	0	0	0	0	0	0	0	0	0	1	0	0	0	0	0	0	0	0	0	0	0	0	2	2	0	0	0	0	0	0	0	2	1	0	0
OTU_97.276	0	0	1	1	0	0	0	0	2	2	0	4	0	0	0	0	0	0	1	1	0	0	0	0	0	0	0	0	0	1	0	1	0	1	0	1	0	0	2	0	0	0	0	0	0	0	0	0	3
OTU_97.500	0	0	0	0	0	0	0	0	0	0	0	0	0	3	1	0	0	0	0	0	0	0	0	0	0	0	0	0	0	0	0	2	0	0	2	0	2	0	0	0	0	0	0	1	0	0	1	0	0
OTU_97.591	0	0	0	0	1	1	1	0	0	0	0	1	0	0	2	0	0	1	0	4	0	0	0	0	0	1	0	2	4	0	0	4	0	0	0	0	0	1	0	0	0	0	0	6	0	0	1	0	0
OTU_97.60	0	14	0	0	0	0	0	0	0	0	0	0	0	0	0	0	0	0	0	0	0	0	0	0	0	0	0	0	0	1	0	0	0	0	0	0	0	0	0	0	0	0	0	0	0	0	8	0	0
OTU_97.604	0	0	0	0	0	1	0	0	0	2	1	0	1	0	0	0	0	1	1	1	1	0	0	0	2	2	0	0	0	0	0	0	0	0	0	0	0	2	1	0	0	1	1	0	2	0	0	0	0
OTU_97.141	0	0	0	0	0	0	10	0	0	2	0	0	0	0	0	2	0	0	1	0	0	0	0	0	0	0	0	0	0	1	1	0	6	0	0	0	1	12	0	0	0	0	0	0	0	0	0	0	34
OTU_97.236	0	0	0	0	0	2	0	1	0	1	0	0	0	0	0	0	3	2	2	2	20	0	0	0	4	0	1	0	0	0	0	0	0	7	0	0	10	0	0	0	1	0	0	2	3	0	0	0	0
OTU_97.332	0	0	2	0	0	2	0	0	0	0	2	9	0	0	0	0	0	0	0	2	0	10	0	0	0	0	0	0	0	0	0	0	1	0	0	0	0	20	1	0	0	0	0	1	5	0	0	0	0
OTU_97.511	0	0	0	0	1	8	0	1	0	3	2	2	1	0	0	0	10	1	3	2	4	2	0	0	61	0	3	0	0	0	0	1	0	5	3	2	0	1	2	0	151	1	0	0	0	1	0	0	0
OTU_97.279	1	0	1	0	0	2	0	1	0	4	2	5	1	0	0	0	3	0	0	2	0	1	1	0	7	0	0	3	0	0	0	10	0	0	0	23	0	1	1	0	4	1	2	0	2	0	0	0	0
OTU_97.179	0	0	0	0	0	0	0	0	0	0	0	8	7	1	0	0	1	5	0	2	3	2	0	1	0	0	0	4	1	0	1	5	0	0	0	2	0	1	0	0	0	0	0	0	0	0	0	0	0
OTU_97.323	0	0	0	0	0	0	0	0	2	0	0	0	2	1	0	0	0	0	0	0	0	0	0	0	0	0	0	0	1	0	1	0	0	0	3	0	0	0	0	0	0	0	0	0	1	0	0	0	0
OTU_97.444	2	0	0	0	0	0	0	0	0	0	0	0	1	1	0	0	0	0	0	0	0	0	0	0	0	0	0	0	0	0	0	1	0	0	2	0	0	0	0	0	0	0	0	0	1	3	1	0	1
OTU_97.498	0	0	0	0	0	0	0	2	1	0	0	0	0	0	0	0	0	0	0	1	0	0	0	0	0	0	1	2	0	0	0	0	0	0	0	1	0	0	0	0	0	2	0	0	0	0	1	0	0
OTU_97.516	0	0	0	0	0	0	0	0	0	0	0	0	0	0	0	0	0	0	0	1	0	0	0	0	0	0	0	0	0	0	0	0	0	0	0	0	0	0	1	0	0	1	0	3	0	0	0	0	1
OTU_97.108	1	0	0	0	0	0	0	0	0	0	0	0	0	0	0	0	0	0	0	0	0	0	0	0	0	0	0	0	0	1	0	0	0	0	0	0	0	0	0	0	0	0	0	0	0	0	0	0	0
OTU_97.119	1	0	0	0	0	0	0	0	0	4	0	0	1	1	0	0	0	0	0	0	0	0	0	0	0	0	0	4	0	0	0	0	0	0	0	0	0	0	2	0	0	0	2	0	0	1	0	0	16
OTU_97.231	0	0	0	0	0	0	2	0	0	0	1	0	0	0	0	0	1	7	1	1	0	2	0	1	0	1	1	0	0	9	0	1	0	0	0	0	0	0	1	1	0	0	0	1	0	0	0	0	0
OTU_97.423	0	2	0	0	0	0	0	1	0	0	0	0	0	0	0	0	45	1	0	0	1	0	0	0	55	0	0	0	0	0	0	0	0	0	0	0	0	0	0	0	33	0	0	0	0	0	0	0	0
OTU_97.128	0	0	0	0	0	1	0	0	0	0	0	0	0	0	0	3	0	0	0	0	0	1	0	0	0	0	0	0	0	0	0	0	0	0	0	0	0	0	0	0	0	0	0	0	0	1	0	0	0
OTU_97.259	0	0	1	0	0	0	0	1	0	0	0	0	0	4	3	0	0	1	0	0	1	0	4	0	0	0	0	0	0	0	0	0	0	0	0	2	0	0	1	0	0	0	0	0	0	0	0	0	1
OTU_97.281	0	0	0	0	0	1	0	0	0	0	0	1	1	0	0	0	0	0	0	0	0	0	0	1	0	0	0	0	0	1	0	0	0	1	0	0	1	0	0	0	0	0	0	0	6	0	0	0	0
OTU_97.613	0	0	0	0	2	4	0	0	0	1	1	0	6	0	0	0	1	2	0	1	0	7	20	11	0	0	2	1	0	0	9	3	0	0	2	4	0	0	2	1	0	0	0	0	3	0	0	0	0
OTU_97.572	0	0	0	0	0	0	1	0	0	0	0	0	0	0	0	1	0	0	0	0	0	0	0	0	0	0	0	0	2	2	0	0	0	0	1	0	0	0	0	0	0	0	0	0	0	0	0	0	0
OTU_97.678	1	0	0	0	0	1	0	0	0	0	0	0	0	0	0	0	0	0	0	0	0	0	0	0	0	0	0	0	0	0	0	0	0	0	0	0	0	0	0	0	0	0	0	0	0	0	1	0	0
OTU_97.351	0	0	0	0	0	2	0	1	0	0	1	0	3	0	2	0	0	0	0	2	1	0	1	1	0	0	0	0	0	0	0	2	0	0	1	0	1	0	0	1	2	1	3	0	0	0	0	0	0
OTU_97.626	0	0	0	0	1	0	0	2	0	0	0	1	1	0	0	0	2	1	1	0	0	1	1	1	1	1	1	0	0	0	4	5	0	4	1	0	0	0	0	0	0	6	1	0	1	0	0	1	0
OTU_97.225	6	0	2	0	0	1	0	1	0	0	0	1	0	0	0	0	0	2	0	2	0	0	0	0	0	0	1	0	1	1	0	0	0	0	0	0	0	9	0	0	0	0	0	0	1	1	0	0	0
OTU_97.272	2	0	0	0	0	0	0	0	0	0	0	0	0	0	0	0	0	0	0	0	0	0	0	0	0	0	0	0	0	1	0	0	0	0	0	0	0	2	0	0	0	0	0	0	0	0	1	0	0
OTU_97.427	0	0	0	0	0	0	0	0	0	0	0	0	0	0	0	0	0	0	0	0	1	0	0	0	0	0	1	0	0	0	0	0	0	0	0	0	0	0	0	0	0	0	0	0	0	2	0	0	0
OTU_97.682	0	0	0	0	0	3	0	3	0	5	7	12	0	0	0	1	6	0	1	1	0	0	0	0	2	0	0	0	0	0	0	0	0	4	6	7	0	1	0	0	10	0	2	0	27	3	14	0	0
OTU_97.193	0	0	0	0	0	1	0	0	1	0	1	2	0	1	0	0	0	0	0	0	0	1	0	0	0	0	0	0	0	0	0	0	2	0	0	0	0	1	0	1	0	0	0	1	0	0	0	0	1
OTU_97.325	0	5	0	0	0	0	0	0	0	0	0	0	0	0	1	1	0	0	0	0	0	0	0	0	0	0	0	0	0	1	0	0	0	0	0	0	0	0	1	0	0	0	0	0	0	0	1	0	0
OTU_97.466	2	0	0	0	0	0	0	0	0	1	0	0	0	0	0	0	0	0	0	0	0	0	0	0	0	1	0	0	0	0	0	0	0	0	0	1	0	0	0	0	1	1	0	0	0	0	1	0	0
OTU_97.148	0	6	0	0	1	0	0	0	1	0	0	0	0	1	0	0	0	0	0	0	0	0	0	0	0	0	0	0	0	0	0	0	0	0	0	0	0	0	0	0	0	0	0	0	0	0	0	0	0
OTU_97.274	0	0	0	0	0	0	0	0	0	0	0	0	0	1	0	2	0	0	0	0	0	0	0	0	0	0	1	0	0	0	0	0	0	0	0	0	0	0	0	0	0	0	0	0	0	1	0	0	1
OTU_97.359	0	0	0	0	0	1	0	0	0	0	0	0	1	0	0	0	0	0	0	0	0	1	0	0	0	0	0	0	0	0	1	0	1	2	0	2	0	0	0	0	0	0	0	0	0	0	0	0	0
OTU_97.339	0	0	0	0	0	1	0	2	0	3	0	1	0	0	0	0	0	0	0	0	0	1	0	0	0	0	1	0	0	0	103	8	0	0	0	3	0	0	0	1	0	0	6	0	0	0	0	0	0
OTU_97.73	0	5	1	0	0	0	0	0	0	0	0	0	0	0	0	0	0	0	0	0	0	0	0	0	0	0	0	0	0	0	0	0	0	0	0	0	0	0	0	0	0	0	0	0	0	0	0	0	0
OTU_97.540	1	0	1	0	0	0	0	0	0	0	0	0	0	2	0	0	0	0	0	0	0	0	0	0	0	0	0	0	0	0	0	0	0	0	0	0	1	0	0	0	0	0	0	0	0	0	0	0	0
OTU_97.623	1	0	1	0	0	2	1	1	0	2	0	0	2	0	0	0	1	0	1	0	3	0	0	0	0	0	0	0	0	0	0	0	0	1	2	0	1	0	0	2	1	1	0	0	1	0	2	0	0
OTU_97.104	0	6	1	0	0	0	0	0	0	0	0	0	0	0	0	0	0	0	0	0	0	0	0	0	0	0	0	0	0	0	0	0	0	0	0	0	2	2	0	1	0	1	0	0	0	0	0	0	4
OTU_97.120	0	0	0	0	0	3	0	1	0	0	0	0	8	5	0	0	0	0	0	0	0	0	0	0	0	0	0	0	0	0	0	0	0	0	0	0	0	2	0	0	0	0	0	0	0	0	2	0	0
OTU_97.121	0	9	0	0	0	0	0	0	0	0	0	0	0	0	0	0	0	0	0	0	0	0	0	0	0	0	0	0	0	0	1	0	0	0	0	0	0	0	0	0	0	0	0	0	1	0	0	0	0
OTU_97.186	0	0	0	0	1	0	0	0	0	0	0	1	2	0	0	0	0	0	0	0	0	0	1	0	0	0	0	1	0	0	0	0	0	0	0	0	0	0	0	0	0	0	0	0	0	0	0	0	0
OTU_97.206	0	0	0	0	1	2	0	2	0	2	1	6	0	0	0	0	3	1	7	2	0	0	0	0	4	0	0	0	0	0	0	1	0	1	1	6	0	2	4	2	1	0	4	0	2	0	2	0	0
OTU_97.490	0	0	0	0	0	0	1	0	0	0	1	0	0	0	0	0	0	0	1	0	0	0	0	0	1	0	0	1	0	0	0	0	1	0	0	1	0	0	0	4	0	0	1	0	0	0	0	0	0
OTU_97.575	0	0	0	0	0	0	2	1	3	0	0	0	0	0	0	0	0	0	0	1	1	0	0	0	0	0	1	0	0	0	0	0	1	2	0	0	0	0	0	0	0	0	0	0	0	0	0	2	3
OTU_97.123	0	0	0	0	0	2	1	5	0	2	0	38	7	0	0	0	13	0	1	0	0	0	0	0	3	2	0	0	0	0	0	0	0	8	5	0	0	0	3	4	5	0	0	1	19	0	5	0	0
OTU_97.293	0	0	0	0	1	1	0	6	0	4	2	9	2	0	0	0	6	0	4	0	0	0	1	0	4	0	1	0	0	0	0	0	0	1	2	10	1	0	1	0	0	0	7	0	2	0	6	0	0
OTU_97.366	0	0	0	0	0	0	0	0	1	0	0	2	1	0	0	0	0	0	0	0	0	0	0	0	0	0	0	0	0	0	0	0	1	0	0	0	0	0	2	0	0	0	0	0	1	0	0	0	0
OTU_97.468	0	1	0	0	0	0	0	0	0	0	0	0	0	0	0	0	0	0	0	0	0	0	0	0	0	0	0	0	0	0	0	0	0	0	2	0	0	0	2	0	0	1	0	0	0	0	1	0	0
OTU_97.150	0	0	0	0	0	0	0	0	0	0	0	0	0	0	1	0	0	0	0	0	0	0	0	0	0	0	0	0	0	0	0	0	0	0	0	0	0	0	0	0	0	0	0	0	0	1	0	1	0
OTU_97.162	0	1	0	0	0	1	0	0	1	1	2	1	0	0	0	0	0	2	0	1	0	0	0	0	0	0	0	0	0	0	0	1	0	1	0	1	0	1	0	0	0	0	0	0	0	0	0	1	0
OTU_97.372	0	0	0	0	0	0	0	0	0	0	0	0	0	0	0	1	0	0	0	0	0	0	0	0	0	0	0	0	0	0	0	0	0	0	0	0	0	0	0	0	0	0	0	0	0	0	0	0	0
OTU_97.143	0	1	0	0	0	0	0	0	0	0	0	0	0	0	0	1	0	0	0	0	0	0	0	0	0	0	0	0	0	0	0	0	0	0	0	0	0	0	0	0	0	0	0	0	0	0	2	0	0
OTU_97.164	0	0	0	0	0	1	0	0	0	0	0	1	0	0	0	0	0	0	0	0	0	0	1	0	0	0	0	0	0	0	0	0	0	0	0	0	0	0	0	0	0	0	0	0	0	0	0	0	0
OTU_97.184	1	0	0	0	0	1	0	0	0	0	1	0	0	1	1	0	1	0	0	1	0	0	0	0	0	0	0	0	0	0	0	0	0	0	0	0	0	0	0	0	0	0	0	1	0	1	2	0	0
OTU_97.253	0	0	0	0	0	0	0	0	0	0	1	0	5	0	1	0	1	0	0	0	0	1	11	3	0	0	1	0	0	0	2	1	0	0	0	0	0	0	0	0	0	0	0	2	0	0	0	0	0
OTU_97.638	1	0	0	0	0	0	1	0	0	0	0	0	0	0	0	0	0	1	0	1	0	0	0	0	0	1	4	0	0	1	0	0	0	0	0	0	0	0	0	2	1	0	0	0	0	0	2	0	0
OTU_97.645	0	0	0	0	0	0	0	0	0	0	0	0	0	2	0	0	0	0	0	0	0	0	0	0	0	0	0	0	0	0	0	0	0	0	0	0	0	0	0	0	0	0	0	0	0	0	0	0	0
OTU_97.663	0	0	0	0	0	0	0	0	0	0	0	0	0	0	2	4	0	0	0	0	0	0	0	0	0	0	0	0	0	0	1	0	0	0	0	0	0	0	0	0	0	0	0	0	0	0	0	0	0
OTU_97.113	0	0	0	0	0	0	0	0	0	0	3	0	0	0	0	0	0	1	0	0	0	0	0	0	0	0	0	30	1	0	0	4	0	0	1	2	0	0	0	0	0	0	0	1	1	3	0	0	0
OTU_97.156	0	0	1	0	1	0	0	0	0	1	0	1	0	0	0	0	0	1	1	0	4	0	0	1	1	0	0	0	1	0	0	0	0	0	2	1	0	1	1	1	0	0	0	2	0	0	0	0	0
OTU_97.176	0	1	0	0	0	1	0	0	0	1	0	4	0	0	0	0	0	0	0	0	1	0	0	0	0	0	0	0	0	0	1	0	0	0	0	0	0	0	0	0	0	0	0	0	0	0	0	0	0
OTU_97.83	8	0	0	0	10	0	0	0	0	46	85	0	14	0	0	7	10	0	0	0	4	0	0	0	1	0	1	0	0	0	4	1	1	1	0	0	0	0	10	3	0	0	5	0	0	0	0	1	0
OTU_97.155	0	0	0	2	0	0	0	0	0	0	0	0	0	0	0	0	0	0	1	6	0	0	0	0	0	0	0	4	0	0	0	2	0	1	0	2	0	9	0	0	0	0	0	2	1	1	0	0	0
OTU_97.167	0	0	0	0	0	0	2	0	0	3	3	0	0	0	0	0	4	0	0	1	0	0	0	0	0	0	0	1	0	0	0	0	0	0	1	0	1	0	0	2	0	2	4	0	2	0	0	0	0
OTU_97.350	0	1	0	0	0	2	0	0	0	0	0	0	1	0	0	0	0	0	0	0	0	0	0	0	0	0	0	0	0	0	0	0	0	0	0	0	0	0	3	0	0	0	0	0	0	0	0	0	0
OTU_97.124	0	0	0	0	0	1	0	0	0	2	1	0	0	0	1	0	2	1	0	0	0	0	0	0	0	0	0	0	0	0	0	0	0	0	0	0	0	11	0	0	0	0	0	0	0	1	0	0	1
OTU_97.188	0	0	0	0	0	0	0	0	0	0	2	2	0	0	0	0	0	0	1	0	0	0	0	0	0	0	0	15	1	0	0	3	0	0	0	1	0	1	0	0	0	0	0	0	0	0	0	0	0
OTU_97.380	0	6	0	0	0	0	1	0	0	0	0	0	0	0	0	0	0	1	0	0	0	0	0	0	0	0	0	0	0	0	1	0	0	1	0	0	0	0	0	0	0	1	0	0	0	1	0	0	0
OTU_97.401	0	0	1	3	1	0	7	1	0	0	0	0	0	0	0	0	0	1	0	0	0	0	0	0	0	0	0	0	0	0	0	0	0	0	0	0	0	1	0	0	0	0	0	1	0	0	0	0	1
OTU_97.493	1	0	0	0	0	0	0	0	0	0	0	0	1	1	0	0	0	0	0	0	0	0	0	0	0	0	0	1	0	0	0	0	0	0	0	0	0	1	0	0	0	0	0	0	0	0	0	0	0
OTU_97.630	0	0	0	0	1	0	0	0	0	0	0	0	0	1	0	9	0	0	0	0	0	0	0	0	0	0	0	0	0	0	0	0	0	0	0	0	0	0	0	0	0	0	0	0	0	3	3	0	0
OTU_97.641	0	0	1	0	0	0	0	0	0	0	0	2	0	0	0	1	3	0	0	0	0	0	0	0	0	0	0	0	0	0	1	0	0	0	0	3	0	1	0	0	0	1	0	0	0	0	0	0	0
OTU_97.136	0	5	0	0	0	0	0	0	0	0	0	0	1	2	0	1	0	0	0	0	0	0	0	0	0	0	0	0	0	0	0	0	0	0	0	0	0	0	0	0	0	0	0	0	0	0	2	0	0
OTU_97.169	0	2	0	0	0	0	0	0	0	0	0	1	0	1	0	2	0	0	0	0	0	0	0	0	0	0	0	0	0	0	0	0	0	0	0	0	0	0	0	0	0	0	0	1	0	0	0	0	0
OTU_97.295	0	1	1	0	0	0	0	0	0	1	1	0	1	0	0	0	0	0	0	1	0	7	3	5	0	0	0	0	0	1	9	0	0	0	0	4	0	0	0	1	0	1	0	0	1	0	0	0	0
OTU_97.455	0	0	0	0	0	4	0	0	0	1	1	1	2	0	0	0	12	0	2	0	0	0	1	0	4	0	0	0	0	0	0	0	0	13	0	0	0	0	0	0	0	0	1	0	11	0	2	0	0
OTU_97.521	0	0	1	0	0	0	0	0	0	1	0	0	1	2	0	0	0	0	0	0	0	0	0	0	0	0	0	0	0	0	0	0	0	0	1	0	0	0	0	0	0	0	0	1	0	0	0	0	1
OTU_97.550	0	0	0	0	0	0	0	0	0	0	0	0	0	1	0	0	0	0	0	0	0	0	0	0	0	0	0	0	0	0	0	0	1	0	4	0	4	1	3	0	0	0	0	0	0	0	0	0	0
OTU_97.76	0	0	0	0	0	11	0	2	0	0	1	7	33	0	0	0	0	2	0	0	0	0	0	0	0	0	0	0	0	0	0	0	0	0	13	0	0	2	0	0	0	0	0	0	0	0	1	0	0
OTU_97.316	0	0	0	0	0	0	0	0	0	0	0	0	0	0	0	0	0	0	0	0	1	0	0	0	0	0	0	2	0	0	0	0	0	0	0	0	0	0	0	1	0	0	0	0	0	7	0	0	0
OTU_97.413	0	0	0	0	0	0	0	0	0	0	0	0	0	0	0	1	0	0	0	0	0	0	0	0	0	0	0	0	0	1	0	0	0	0	0	0	0	0	0	0	0	0	0	0	0	0	0	0	0
OTU_97.374	0	0	0	0	0	0	0	0	0	0	0	0	0	0	0	1	0	0	0	0	0	0	0	0	0	0	0	0	1	0	0	0	0	0	0	0	0	2	0	0	0	0	0	0	0	0	0	0	0
OTU_97.400	1	0	2	0	0	1	7	0	0	0	2	8	0	0	0	0	0	1	28	5	0	1	0	0	0	0	0	1	0	0	1	1	0	0	0	0	0	0	0	0	0	1	1	0	0	0	0	16	0
OTU_97.421	0	0	6	0	6	0	12	0	0	3	3	2	14	0	0	2	0	7	10	1	2	1	0	0	0	0	0	0	0	0	0	2	0	0	0	1	0	0	2	0	0	0	0	6	0	2	0	2	0
OTU_97.505	0	0	0	0	0	0	0	0	0	0	0	0	0	3	0	1	0	0	0	0	0	0	0	0	0	0	0	0	0	0	0	0	0	0	0	0	0	0	1	0	0	0	0	0	0	1	3	0	0
OTU_97.574	0	0	0	0	1	0	2	0	0	1	0	0	0	0	0	0	0	0	1	0	0	0	1	0	0	0	0	0	0	0	3	0	0	3	0	0	3	0	0	0	0	0	0	0	0	1	0	0	0
OTU_97.116	0	0	0	0	0	1	0	1	0	1	0	0	0	0	0	0	4	0	0	0	0	0	0	0	116	0	0	0	0	0	1	0	0	0	0	0	0	0	0	0	37	0	0	0	0	0	0	0	0
OTU_97.130	0	2	2	0	0	1	0	2	1	0	0	7	0	0	0	0	0	0	0	8	0	1	0	0	0	0	0	0	0	0	0	0	0	2	0	0	0	8	0	1	0	0	0	0	0	2	0	0	0
OTU_97.170	0	0	4	0	0	1	0	0	0	4	0	0	0	0	0	0	1	0	0	0	0	0	3	1	1	0	0	3	0	0	6	1	0	0	0	6	0	0	0	2	0	0	2	0	2	0	0	0	0
OTU_97.194	0	0	0	0	0	0	0	0	0	1	0	0	1	0	0	0	0	0	0	0	0	0	0	0	1	1	0	0	0	0	0	0	0	0	0	0	0	1	0	0	0	0	0	0	0	0	0	0	0
OTU_97.82	0	0	0	0	0	0	0	0	0	0	0	0	0	0	0	3	0	0	0	0	0	0	0	0	0	0	0	0	0	0	0	0	0	0	0	0	0	0	0	0	0	0	0	0	0	0	0	0	0
OTU_97.134	0	0	0	0	0	0	0	0	0	0	0	0	0	1	0	0	0	0	0	0	0	0	0	0	0	0	0	0	0	0	0	0	0	0	0	0	0	0	0	0	0	0	0	0	0	0	1	0	0
OTU_97.338	0	1	0	0	0	0	0	0	0	0	0	0	2	0	1	0	0	0	0	0	0	0	0	0	0	0	0	0	0	2	0	0	0	0	0	0	0	0	0	0	0	0	0	0	0	0	0	0	0
OTU_97.607	0	0	0	0	0	1	0	0	0	2	0	5	0	0	0	3	2	0	2	0	0	0	1	0	0	0	0	0	0	0	0	0	0	3	1	7	0	0	0	0	0	0	0	0	10	0	6	0	0
OTU_97.168	0	0	0	0	0	0	0	0	0	0	0	0	0	0	0	0	0	0	0	0	0	0	0	0	0	0	0	0	0	0	0	0	0	0	0	0	14	0	0	0	0	0	0	0	0	0	1	0	0
OTU_97.175	0	0	0	0	0	0	0	0	0	0	0	0	0	0	0	0	0	0	0	0	0	0	0	0	0	0	0	0	0	0	0	0	0	0	0	0	0	0	0	0	0	0	0	0	0	0	0	0	0
OTU_97.77	1	0	0	0	0	2	0	0	0	0	0	0	0	0	0	0	56	1	6	1	0	0	0	0	25	3	0	0	0	0	0	0	0	0	0	0	0	0	30	1	4	0	0	0	14	0	2	0	0
OTU_97.110	0	0	0	0	0	36	0	0	0	37	0	0	0	0	0	0	5	1	3	2	0	0	0	0	16	2	0	0	0	0	0	0	0	7	1	0	0	0	0	0	7	3	0	0	7	2	0	0	0
OTU_97.441	0	0	6	0	2	0	0	0	0	9	5	0	1	0	0	0	0	1	0	3	0	1	0	1	1	0	0	0	0	0	6	7	0	0	0	6	0	0	0	0	0	0	3	0	1	0	0	3	0
OTU_97.125	0	0	0	0	0	0	0	1	0	0	0	0	3	1	3	0	0	0	0	0	0	0	0	0	0	0	0	0	0	0	2	0	0	0	0	0	0	82	1	0	0	0	0	0	0	0	0	0	0
OTU_97.183	0	0	0	0	0	0	0	1	1	0	0	0	1	0	0	0	0	0	0	0	0	0	0	0	1	0	0	0	0	0	0	0	0	0	0	0	0	0	0	0	0	0	0	0	0	0	0	0	0
OTU_97.292	0	0	0	0	0	0	0	0	0	0	0	0	0	0	0	0	0	0	0	0	0	0	0	0	0	0	0	0	0	0	0	0	0	0	0	0	0	0	0	0	0	0	0	0	0	0	0	0	0
OTU_97.447	0	0	0	0	0	0	0	0	0	0	0	3	0	0	0	0	0	1	0	1	0	0	0	0	0	1	0	0	0	0	0	0	2	3	0	0	0	0	0	0	0	0	0	0	2	0	0	0	1
OTU_97.185	0	0	0	0	0	8	0	0	0	0	0	0	0	0	0	0	0	0	0	0	0	0	0	0	0	0	0	0	0	0	0	0	0	0	0	0	0	2	0	0	0	0	0	0	0	0	0	0	0
OTU_97.204	0	2	0	0	0	0	0	0	0	0	0	0	1	0	0	0	0	0	0	0	0	0	0	0	0	0	0	0	0	0	1	0	0	0	0	0	0	0	1	0	0	0	0	0	0	0	0	0	0
OTU_97.221	0	1	0	0	0	0	0	0	2	1	0	1	0	0	1	0	0	0	0	0	0	0	0	0	0	0	0	2	0	0	0	0	0	0	0	0	0	2	0	0	0	0	0	0	0	0	0	0	1
OTU_97.308	0	0	0	0	0	0	0	0	0	0	0	0	1	0	0	0	0	0	0	1	0	0	0	0	0	1	0	4	1	1	0	0	0	0	0	0	0	0	0	0	0	0	1	0	0	0	0	0	0
OTU_97.522	0	0	0	0	0	0	0	0	0	0	0	4	2	0	0	0	0	0	0	0	0	0	0	0	0	1	0	0	0	1	0	0	0	0	0	1	0	0	0	0	0	0	0	1	2	0	0	0	0
OTU_97.181	0	4	0	0	1	0	0	0	0	0	0	0	0	0	2	5	0	0	0	0	0	0	0	0	0	0	0	0	0	0	0	0	0	0	0	0	0	1	0	1	0	0	0	0	0	0	0	0	0
OTU_97.199	0	0	0	0	0	0	0	0	0	0	0	0	0	0	0	1	0	0	0	0	0	0	0	0	0	0	0	0	0	0	0	0	0	0	0	0	0	0	0	0	0	0	0	0	0	0	0	0	0
OTU_97.428	0	0	0	0	0	0	0	1	0	0	0	30	0	0	0	0	0	0	0	1	0	0	0	0	1	0	0	0	0	0	0	0	0	0	0	0	0	4	1	1	0	0	0	0	0	0	0	0	0
OTU_97.457	0	0	0	0	0	0	0	0	0	0	0	0	0	0	0	0	0	0	0	0	0	0	1	0	0	0	0	0	0	1	0	1	0	0	0	0	0	0	0	0	0	0	0	0	0	0	0	0	0
OTU_97.230	0	0	1	0	0	0	0	0	0	0	1	0	0	0	0	0	0	0	0	0	0	0	0	0	0	0	0	0	0	0	0	0	0	0	0	0	0	0	0	0	0	0	0	0	0	0	0	0	1
OTU_97.378	2	0	0	0	0	0	0	0	1	0	0	0	1	0	0	0	0	0	0	0	0	1	0	0	0	0	0	0	0	0	0	0	0	0	0	0	0	0	0	0	0	0	1	0	0	0	0	0	0
OTU_97.228	0	0	0	1	0	0	0	0	0	0	0	0	0	0	1	0	0	0	0	0	0	0	0	0	0	0	0	1	1	0	0	0	0	0	0	0	0	0	0	0	0	2	0	0	0	0	0	0	0
OTU_97.481	1	0	0	0	0	0	0	0	0	0	0	0	0	0	0	0	0	0	0	0	0	0	0	0	0	0	0	0	0	0	0	0	0	0	0	0	0	0	0	0	0	0	0	0	1	1	1	0	0
OTU_97.621	1	0	1	1	0	0	0	0	0	0	0	0	0	0	0	0	0	0	0	1	0	0	0	0	0	0	0	0	0	0	0	0	0	1	0	0	0	0	0	0	0	0	0	0	0	0	0	0	0
OTU_97.90	0	0	0	0	0	0	0	0	0	1	0	0	0	0	0	0	0	0	0	0	0	0	0	0	0	0	0	0	0	1	0	0	0	0	0	0	0	1	0	0	0	0	0	0	0	0	0	1	0
OTU_97.209	0	1	0	0	0	0	0	0	0	0	0	0	0	0	0	0	0	0	0	0	0	0	0	1	0	0	0	0	0	0	0	0	0	0	1	0	0	0	0	0	0	0	0	0	0	0	0	0	0
OTU_97.216	0	0	0	0	0	0	0	0	0	0	0	0	0	0	0	0	0	0	1	0	0	0	0	0	0	0	0	0	0	0	0	0	0	0	0	0	0	0	0	0	0	0	0	0	0	0	2	0	0
OTU_97.324	0	0	0	0	0	0	0	0	0	1	0	0	2	0	1	0	0	0	0	0	1	0	0	0	0	0	0	0	0	0	0	0	0	0	0	0	1	0	0	0	0	0	0	0	0	0	0	0	0
OTU_97.453	0	2	0	0	0	0	0	0	0	0	0	0	0	0	0	0	0	0	0	0	0	0	0	0	0	0	0	0	0	0	0	0	0	0	0	0	0	0	0	0	0	0	0	0	0	0	0	0	0
OTU_97.529	0	0	0	0	0	0	1	0	0	0	0	0	0	0	0	0	0	0	0	0	0	0	0	0	0	0	0	0	0	0	0	0	0	0	0	0	0	0	0	0	0	1	0	0	0	0	0	0	0
OTU_97.548	0	0	0	0	0	0	0	1	0	0	0	0	0	1	2	0	1	0	0	0	2	1	0	0	0	0	0	0	0	0	0	0	0	0	1	0	0	0	0	0	0	0	0	1	0	0	0	0	0
OTU_97.570	1	0	0	0	0	0	0	0	0	0	0	0	0	0	0	0	0	0	0	0	0	0	0	0	0	0	0	0	0	0	0	0	0	0	0	1	0	0	0	0	0	0	0	0	1	0	2	0	0
OTU_97.112	0	0	0	0	0	13	0	1	0	0	0	33	0	0	0	1	8	0	0	1	0	0	0	0	26	0	0	0	0	0	0	0	0	0	0	0	0	0	0	0	39	0	0	0	0	2	0	0	0
OTU_97.129	0	0	0	0	0	1	0	0	0	0	0	0	0	0	0	0	0	0	0	0	0	0	0	0	0	0	0	0	0	0	0	0	1	0	0	0	0	3	0	0	0	0	0	0	0	0	0	0	0
OTU_97.135	0	7	0	0	0	0	0	0	0	0	0	0	1	1	0	0	0	0	0	0	0	0	0	0	0	0	0	0	0	0	0	0	0	0	0	0	0	0	0	0	0	0	0	0	0	0	0	0	0
OTU_97.152	0	0	0	0	0	0	0	0	0	0	0	0	0	0	0	0	0	0	0	0	0	0	1	0	0	0	0	0	0	0	0	0	0	0	0	0	0	0	0	0	0	0	0	0	0	0	0	0	0
OTU_97.363	0	0	1	0	0	0	0	0	0	0	0	0	0	0	0	1	0	0	0	0	0	0	0	0	0	0	0	0	0	0	0	0	0	0	0	0	0	1	0	1	0	0	0	0	0	0	0	0	0
OTU_97.546	0	0	0	0	1	1	0	0	0	0	0	0	0	0	0	0	0	2	0	0	1	1	1	0	0	0	0	0	0	0	1	0	0	0	0	0	0	0	0	0	0	0	2	0	0	0	0	0	0
OTU_97.547	0	0	0	0	0	0	0	0	0	0	0	0	1	0	0	0	0	0	0	0	0	0	0	0	0	0	0	1	0	0	0	0	0	0	0	0	0	0	0	0	0	0	0	0	0	4	0	0	0
OTU_97.560	0	0	0	0	0	0	0	0	0	0	0	0	0	0	0	0	0	0	0	0	0	0	0	0	0	0	0	0	0	0	0	0	0	0	0	0	0	1	0	0	0	0	0	0	0	0	0	1	0
OTU_97.171	1	0	0	0	0	0	0	0	1	0	0	0	0	0	0	0	0	0	0	0	0	0	0	0	0	0	0	0	0	0	0	0	0	0	0	0	0	0	0	0	0	0	0	0	0	0	0	0	0
OTU_97.238	0	0	0	0	0	0	0	0	0	0	0	1	0	0	0	0	0	0	0	0	0	0	0	0	0	0	0	0	0	0	0	0	0	0	0	0	0	0	0	0	0	0	0	0	0	0	0	0	0
OTU_97.475	1	3	0	0	0	0	0	0	0	0	0	0	1	2	0	0	0	0	0	0	0	0	0	0	0	0	0	0	0	1	0	0	0	0	0	0	0	0	0	0	0	0	0	0	0	0	0	0	1
OTU_97.583	0	0	0	0	0	1	0	0	0	0	0	0	0	0	0	0	0	0	0	1	0	0	0	0	0	0	0	0	0	0	0	0	0	0	0	0	0	1	3	0	0	0	0	0	0	0	0	0	1
OTU_97.239	0	0	0	0	0	0	0	0	0	0	0	0	0	0	0	0	0	0	0	0	0	0	0	0	0	0	0	0	0	0	0	0	0	0	0	0	0	0	0	0	0	0	0	0	0	0	0	0	0
OTU_97.440	1	0	0	0	0	0	0	0	0	0	0	0	0	0	0	0	0	0	0	0	0	0	0	0	0	0	0	2	2	0	0	3	0	0	1	0	0	1	0	0	0	0	0	0	0	0	0	0	0
OTU_97.456	0	0	0	0	0	1	0	0	0	0	0	0	0	0	0	0	0	0	0	0	0	0	0	0	0	0	0	0	0	0	0	0	0	0	0	0	0	0	0	0	0	0	0	0	0	0	0	0	0
OTU_97.587	4	0	0	0	0	0	0	0	0	0	0	1	0	0	0	0	0	0	0	0	0	1	0	0	0	0	0	0	0	0	0	0	0	0	0	1	0	0	0	1	0	0	0	0	0	0	0	0	2
OTU_97.267	0	0	0	0	0	0	0	0	0	0	0	0	0	0	0	0	0	0	0	0	0	0	0	0	0	0	0	0	0	0	0	0	0	0	1	1	0	0	0	0	0	0	0	0	0	0	0	0	0
OTU_97.289	0	0	0	0	0	0	0	0	0	0	0	0	1	0	0	0	0	0	0	0	0	0	0	0	0	0	0	0	0	0	0	0	1	0	0	0	0	0	0	0	0	0	0	0	0	0	0	0	0
OTU_97.379	0	0	0	0	0	0	0	0	0	0	0	0	0	0	0	0	0	0	0	0	0	0	0	0	0	0	0	0	0	2	0	0	0	0	1	0	0	0	0	0	0	0	0	0	0	0	0	0	1
OTU_97.470	0	0	0	0	0	0	0	0	0	0	0	2	0	0	7	0	0	0	0	0	0	0	0	0	0	0	0	0	0	0	0	0	0	0	0	0	0	0	0	0	0	0	0	0	1	0	0	0	0
OTU_97.571	0	0	0	0	1	1	0	0	0	0	1	0	0	0	0	0	1	0	0	0	0	0	0	0	0	0	0	0	0	0	0	2	0	1	0	0	0	0	0	1	0	0	0	0	0	0	0	0	0
OTU_97.154	0	0	0	0	0	0	0	0	0	0	0	0	0	0	0	0	0	0	0	0	0	0	0	0	0	0	0	0	0	0	0	0	0	0	0	0	0	0	0	0	0	0	0	0	0	0	3	0	0
OTU_97.217	0	0	0	0	0	0	0	0	0	0	0	0	0	1	0	0	0	0	0	0	0	0	0	0	0	0	0	0	0	0	0	0	0	0	0	0	0	0	0	0	0	0	0	0	0	0	0	0	0
OTU_97.242	1	0	2	0	0	0	0	0	1	0	1	0	0	0	0	0	0	0	0	0	0	0	0	0	0	0	0	0	0	0	1	0	0	0	0	0	2	0	1	0	0	0	0	1	0	0	0	0	5
OTU_97.568	1	0	0	0	5	0	1	0	0	0	0	0	0	9	3	1	0	0	0	0	0	0	0	0	0	0	0	0	5	0	0	0	0	0	0	0	1	0	0	0	0	0	0	0	0	0	1	0	0
OTU_97.165	0	11	0	0	0	0	0	0	0	0	0	0	0	0	0	0	0	0	0	0	0	0	0	0	0	0	0	0	0	0	0	0	0	0	0	0	0	0	0	0	0	0	0	0	0	0	0	0	0
OTU_97.246	0	0	0	0	0	0	0	0	0	0	0	0	0	0	0	0	0	0	0	0	0	0	0	0	0	0	0	0	0	0	0	0	0	0	0	0	0	0	0	0	0	0	0	2	0	0	0	0	0
OTU_97.535	0	0	0	0	0	3	0	0	0	0	0	0	0	0	0	0	0	0	3	0	0	1	0	1	2	0	0	0	0	0	0	0	0	3	0	0	0	0	0	2	3	0	0	0	8	0	3	0	0
OTU_97.565	0	0	0	0	0	9	0	1	0	0	1	1	0	0	0	0	2	0	0	1	1	0	0	0	0	0	0	0	0	0	0	0	0	0	1	0	0	0	1	0	0	0	0	0	0	0	0	0	0
OTU_97.679	0	0	0	0	0	0	0	0	0	0	0	0	0	0	0	0	0	0	0	0	0	0	0	0	0	0	0	0	0	0	0	0	0	0	0	0	0	0	0	0	0	0	0	0	0	0	0	0	0
OTU_97.214	0	0	0	0	0	0	0	0	0	0	0	0	0	1	0	0	0	0	0	2	0	0	0	0	0	0	0	0	0	0	0	0	0	1	0	0	0	0	3	1	0	0	0	0	0	0	0	0	0
OTU_97.222	0	11	0	0	0	0	0	0	0	0	0	0	5	1	0	0	0	0	0	0	0	0	0	0	0	0	0	0	0	0	0	0	0	0	0	0	0	0	0	0	0	0	0	0	0	0	0	0	0
OTU_97.237	0	0	0	0	0	5	0	0	0	0	0	0	0	0	0	0	0	0	0	0	0	0	0	0	0	0	0	0	0	0	0	0	0	0	0	0	0	0	1	1	0	0	0	0	0	0	0	0	0
OTU_97.250	1	0	0	0	0	0	0	0	0	0	0	0	0	0	0	0	0	0	0	0	0	0	0	0	0	0	0	0	0	0	0	0	0	0	0	0	0	0	0	0	0	0	0	0	0	0	0	0	0
OTU_97.266	0	0	0	0	0	0	0	0	0	0	0	0	0	2	0	0	0	0	0	0	0	0	0	0	0	0	0	0	0	0	0	0	0	0	0	0	0	0	0	0	0	0	0	0	0	0	2	0	0
OTU_97.278	0	0	0	1	0	0	0	0	0	0	0	0	1	1	0	0	0	1	0	0	0	0	0	0	0	0	0	0	0	0	1	0	0	0	0	0	0	0	0	0	0	0	0	0	0	0	0	0	1
OTU_97.353	0	0	1	0	0	0	0	0	0	0	0	0	0	0	1	0	0	0	0	0	0	0	0	0	0	0	0	1	0	0	0	0	0	0	0	0	0	0	0	0	0	0	0	0	0	0	0	0	0
OTU_97.618	0	0	0	0	0	1	0	0	0	0	0	0	1	0	1	0	0	1	0	0	0	0	1	0	0	0	0	0	0	0	0	0	0	0	0	0	0	1	0	0	0	0	0	0	0	0	0	0	0
OTU_97.224	0	0	0	0	1	0	0	0	0	0	0	0	0	0	0	1	0	1	0	0	0	0	0	0	0	0	0	0	0	0	0	0	0	0	0	0	0	0	0	0	0	0	0	0	0	0	0	0	0
OTU_97.244	0	1	0	0	0	0	0	0	0	0	0	0	0	0	0	0	0	0	0	0	0	2	0	1	0	0	0	0	0	0	0	0	0	0	0	0	0	1	0	0	0	0	0	0	0	1	0	0	0
OTU_97.255	0	0	0	0	0	0	0	0	0	0	0	0	0	0	0	0	0	0	0	0	0	0	0	0	0	0	0	0	0	0	0	0	0	0	0	0	0	1	0	0	0	0	0	0	0	1	0	0	0
OTU_97.368	0	0	0	0	0	0	0	0	0	0	0	2	0	0	0	0	0	0	0	0	0	0	0	0	0	0	0	0	0	0	0	0	0	0	0	0	0	0	0	0	0	0	0	0	0	0	0	0	0
OTU_97.610	0	0	0	0	0	0	0	0	0	0	0	0	0	1	0	0	0	1	0	0	0	1	0	0	0	0	2	0	0	0	0	0	0	0	0	0	0	0	0	0	0	0	0	0	0	0	0	0	0
OTU_97.622	1	0	0	0	0	0	0	0	0	0	0	0	0	3	0	0	0	0	0	0	0	0	0	0	0	0	0	0	0	0	0	0	0	0	0	0	0	0	0	0	0	0	0	0	0	0	0	0	0
OTU_97.70	0	0	0	0	0	3	0	0	0	8	0	0	0	0	0	0	1	0	0	0	0	0	0	0	0	0	0	0	0	0	0	0	0	0	0	0	0	0	0	0	0	0	0	0	0	1	0	0	0
OTU_97.197	0	0	0	0	0	0	0	0	0	0	0	0	0	0	0	0	0	0	0	0	0	0	0	0	0	0	0	0	0	0	0	0	0	0	0	0	0	0	0	0	0	0	0	0	0	0	0	0	1
OTU_97.198	0	0	0	0	0	0	0	0	0	0	0	0	0	0	0	0	0	0	0	0	0	0	0	0	0	0	0	0	0	0	0	0	0	0	0	0	0	0	0	0	1	0	0	0	0	0	0	0	0
OTU_97.223	0	0	0	0	0	0	0	0	0	0	0	0	0	0	0	2	0	0	0	0	0	0	0	0	0	0	0	0	0	0	0	0	0	0	0	0	0	0	0	0	0	0	0	0	0	0	0	0	0
OTU_97.309	0	0	0	0	0	0	0	0	0	0	0	0	0	0	1	4	0	0	0	0	0	0	0	0	0	0	0	0	0	0	0	0	0	0	0	0	0	1	0	0	0	0	0	0	0	2	1	0	0
OTU_97.396	1	0	0	0	0	0	0	0	0	0	0	0	0	0	0	0	0	0	0	0	0	0	0	0	0	0	0	0	0	0	0	0	0	0	0	0	0	0	0	0	1	0	0	0	0	0	0	0	0
OTU_97.341	0	0	0	0	0	0	0	0	0	0	0	0	1	4	0	0	0	0	1	0	0	0	0	0	0	0	0	0	0	0	0	0	0	0	0	0	0	0	0	0	0	0	0	0	0	0	0	0	0
OTU_97.595	1	0	0	0	0	0	0	0	0	0	0	0	0	1	0	0	0	0	0	0	0	0	0	0	0	0	0	0	0	0	0	0	0	0	0	0	0	0	0	0	0	0	0	0	0	0	1	0	0
OTU_97.190	0	0	0	0	0	0	0	2	0	0	1	0	0	1	0	0	2	1	0	0	0	0	0	0	1	0	0	0	0	0	0	0	0	0	0	0	0	0	0	0	0	0	0	0	0	0	0	0	0
OTU_97.207	0	0	0	0	0	0	0	0	0	0	0	0	0	0	0	1	0	0	0	0	0	0	0	0	0	0	0	0	0	0	0	0	0	0	0	0	1	0	0	0	0	0	0	0	0	0	0	0	0
OTU_97.256	0	1	0	0	0	0	0	0	0	0	0	0	3	0	0	0	0	0	0	0	0	0	0	0	0	0	0	0	0	0	0	0	0	0	0	0	0	1	0	0	0	0	0	0	0	0	0	0	0
OTU_97.260	0	0	0	0	0	0	0	0	0	0	0	1	1	0	0	0	0	0	0	0	0	0	0	0	0	0	0	0	0	0	0	0	0	0	0	0	0	0	0	0	0	0	0	0	0	0	0	0	0
OTU_97.291	0	0	0	0	0	0	0	0	0	3	0	2	4	0	1	0	0	0	0	0	0	0	0	0	6	0	0	0	0	0	0	1	0	1	0	0	0	0	0	0	0	0	0	0	0	0	0	0	0
OTU_97.307	0	0	0	0	0	2	0	1	0	2	0	1	0	0	0	1	0	0	0	0	0	0	0	0	0	0	0	0	0	0	0	0	0	0	0	0	0	1	1	1	0	0	0	0	0	0	0	0	0
OTU_97.472	0	0	0	0	0	0	0	0	0	0	0	0	0	0	0	0	0	0	0	0	0	0	0	0	0	0	0	0	1	0	0	0	0	0	0	0	0	0	0	0	0	0	0	0	0	0	0	0	0
OTU_97.616	0	0	0	0	0	0	0	0	0	0	0	0	0	1	0	0	0	0	0	0	0	0	0	0	0	0	0	0	1	0	0	0	0	0	0	0	0	0	0	0	0	0	0	0	0	4	1	0	0
OTU_97.245	1	0	0	0	0	0	0	0	0	0	0	0	0	0	0	0	0	0	0	0	0	0	0	0	0	0	0	0	0	0	0	0	0	0	0	0	0	0	0	0	0	0	0	0	0	0	1	0	0
OTU_97.257	2	0	0	0	0	0	0	0	0	0	0	0	1	0	0	0	0	0	0	0	1	0	0	0	0	0	0	0	1	0	0	1	0	0	0	0	0	1	1	0	0	0	0	0	0	0	0	0	0
OTU_97.483	0	0	0	0	0	0	0	0	0	1	0	0	0	0	0	0	0	0	0	0	0	0	0	0	0	0	0	1	0	0	1	0	0	0	0	0	0	0	0	0	0	0	0	0	0	0	0	0	0
OTU_97.544	0	0	0	0	0	0	0	0	0	0	0	0	0	0	0	0	0	0	0	0	0	0	0	0	0	0	1	0	0	0	0	0	0	0	0	0	0	3	0	0	0	0	0	0	0	0	0	0	0
OTU_97.243	0	0	0	0	0	0	0	0	0	0	0	0	1	0	0	0	0	0	0	0	0	0	0	0	0	0	0	0	0	0	0	0	0	0	0	0	0	1	0	0	0	0	0	0	0	0	0	0	0
OTU_97.283	0	0	0	0	0	0	0	0	0	0	0	0	0	0	0	0	0	0	0	0	0	0	0	0	0	0	0	0	0	0	0	0	0	0	0	0	0	2	0	0	0	0	0	0	0	0	0	0	0
OTU_97.555	0	0	0	0	0	0	0	0	0	0	0	0	0	0	0	0	0	0	0	0	0	0	0	0	0	0	0	0	0	0	0	0	0	0	0	0	0	0	0	0	0	0	0	0	0	0	0	0	0
OTU_97.600	1	0	2	0	5	0	3	0	0	1	0	0	1	0	0	0	0	0	1	0	0	1	1	0	0	0	0	0	0	0	0	0	0	0	0	1	0	0	0	0	0	0	0	0	0	0	0	1	0
OTU_97.545	0	0	0	0	0	0	0	0	0	0	0	0	0	0	0	0	0	0	0	0	0	0	0	0	0	0	0	0	0	0	0	0	0	0	0	0	0	0	0	0	0	0	0	0	0	0	0	0	2
OTU_97.627	0	0	0	0	1	0	0	0	0	1	1	0	0	0	0	0	0	0	1	0	0	0	0	0	0	0	0	0	0	0	0	0	0	0	0	0	0	0	0	0	4	0	0	0	1	0	0	0	0
OTU_97.71	0	0	0	0	0	0	0	0	4	2	0	0	0	0	0	0	0	0	0	0	0	0	0	0	1	1	2	0	0	0	0	0	0	0	0	0	0	0	0	1	0	0	0	0	0	0	0	0	0
OTU_97.254	0	0	0	0	0	1	0	0	0	0	0	3	0	0	0	0	0	0	1	0	0	0	0	0	0	0	0	0	0	0	0	0	0	1	0	0	0	2	0	0	1	0	0	0	2	0	0	0	0
OTU_97.258	0	0	0	0	0	0	0	0	0	0	0	0	0	0	0	0	0	0	0	0	0	0	0	0	0	0	0	0	0	0	0	0	0	0	0	0	0	0	0	0	0	0	0	0	0	0	1	0	0
OTU_97.264	0	0	0	0	0	0	0	0	0	0	0	0	0	0	0	0	0	0	0	0	0	0	0	0	0	0	0	0	0	0	0	0	0	0	1	0	0	0	0	0	0	0	1	0	0	0	0	0	0
OTU_97.275	0	0	0	0	0	0	0	0	1	0	0	1	0	0	0	0	0	0	2	1	0	0	0	0	0	0	0	0	0	0	0	0	0	0	0	1	0	0	0	0	0	0	0	2	0	0	0	0	0
OTU_97.315	0	0	0	0	0	0	0	0	0	0	0	0	0	0	0	0	0	0	0	0	0	0	0	0	0	0	0	0	0	0	0	0	0	0	0	0	0	0	0	0	0	0	0	0	0	0	0	0	0
OTU_97.479	0	0	0	0	0	0	0	0	0	0	1	0	0	0	0	0	0	0	0	0	0	0	1	0	0	0	0	1	1	0	0	0	0	0	0	0	0	0	0	0	0	0	0	0	0	0	0	0	0
OTU_97.504	0	0	0	0	0	0	0	0	0	1	0	1	0	0	3	0	1	0	0	1	0	0	0	0	0	0	0	0	0	0	0	0	0	0	0	0	0	0	0	0	0	0	0	0	0	0	0	0	0
OTU_97.601	0	0	0	0	0	1	0	0	0	2	0	0	1	0	1	0	0	0	0	0	0	0	0	0	0	0	0	0	0	0	0	0	1	0	0	0	0	0	0	0	0	0	0	0	0	0	0	0	0
OTU_97.296	0	0	0	0	0	0	0	0	0	0	0	0	0	1	0	0	0	0	0	0	0	0	0	0	2	0	0	0	0	0	0	0	0	0	0	0	0	0	0	0	0	0	0	1	0	0	0	0	0
OTU_97.305	0	0	0	0	0	0	1	0	0	0	0	0	0	0	0	0	0	0	0	0	0	0	0	0	0	1	0	0	0	0	1	0	0	0	0	0	0	0	1	0	0	0	0	0	0	0	0	0	0
OTU_97.486	0	0	0	0	0	0	0	0	1	0	0	0	0	0	0	0	0	0	0	1	0	0	0	0	0	0	0	0	0	0	0	2	0	1	0	1	0	0	2	1	0	0	0	0	0	0	0	0	0
OTU_97.94	0	0	0	0	0	0	0	0	0	0	0	0	0	0	0	0	0	0	0	0	0	0	0	0	0	0	0	0	0	0	0	0	0	0	0	0	0	0	0	0	0	0	0	0	0	0	0	0	0
OTU_97.303	0	0	0	0	0	1	0	0	0	0	0	0	0	0	0	0	0	0	0	0	0	0	0	0	0	0	0	0	0	0	0	0	0	0	0	0	0	0	0	0	0	0	0	0	0	0	0	0	0
OTU_97.463	0	0	0	0	0	0	0	0	0	0	0	0	0	0	1	1	0	0	0	0	0	0	0	0	0	0	1	0	0	0	0	0	0	0	0	0	0	0	0	0	0	0	0	0	0	0	0	0	0
OTU_97.265	0	1	0	0	0	0	0	0	0	0	0	0	0	0	0	0	0	0	0	0	0	0	0	0	0	0	0	0	0	0	0	0	0	0	0	0	0	0	0	0	0	0	0	0	0	0	0	0	0
OTU_97.273	0	1	0	0	0	0	0	0	0	0	0	0	0	0	0	0	0	0	0	0	0	1	0	1	0	0	0	0	0	0	0	0	0	0	0	0	0	0	0	0	0	0	0	0	0	0	0	0	0
OTU_97.306	0	0	0	0	0	0	0	0	0	0	0	0	0	0	0	0	0	0	0	0	0	0	0	0	0	0	0	0	0	0	0	0	0	0	0	0	0	0	0	0	0	0	0	0	0	0	0	0	0
OTU_97.319	0	0	0	0	0	0	0	0	0	0	0	0	0	0	0	0	0	0	0	0	0	0	0	0	0	0	0	0	0	0	0	0	0	0	0	0	0	0	0	0	0	0	0	0	0	0	0	0	0
OTU_97.398	0	0	0	0	0	0	0	0	0	0	1	0	0	0	0	0	1	8	1	0	0	0	0	0	0	0	0	0	0	0	0	0	0	14	0	0	0	0	0	0	0	0	0	0	0	0	0	0	0
OTU_97.403	0	0	0	0	0	0	0	0	0	0	0	0	0	0	0	0	0	0	0	0	0	0	0	0	0	0	0	0	0	0	0	0	0	0	0	0	0	0	0	0	0	0	0	0	0	0	0	0	0
OTU_97.489	0	1	0	0	0	0	0	0	0	0	0	0	0	0	0	0	0	0	0	0	0	0	0	0	0	0	0	0	0	0	0	0	0	0	0	0	0	0	0	0	0	0	0	0	0	0	0	0	0
OTU_97.632	0	0	0	0	0	0	0	0	0	0	0	0	0	0	0	0	0	0	0	0	0	0	0	0	0	0	0	0	0	0	0	0	0	0	0	0	0	0	0	0	0	0	0	0	0	0	0	0	0
OTU_97.668	1	0	0	0	0	0	0	0	0	0	0	0	0	0	0	0	0	0	0	0	0	0	0	0	0	0	0	0	0	0	0	0	0	0	0	0	0	0	0	0	0	0	0	0	0	0	0	0	0
OTU_97.318	0	0	0	0	0	0	0	0	0	0	0	0	0	0	0	0	0	0	0	0	0	0	0	0	0	0	0	0	0	0	0	0	0	0	0	0	0	0	1	0	1	0	0	0	0	0	0	0	0
OTU_97.330	0	0	0	0	0	0	0	0	0	0	0	0	0	0	0	0	0	0	0	0	0	0	0	0	0	0	0	0	0	0	0	0	0	0	0	0	0	0	0	0	0	0	0	0	0	1	0	0	0
OTU_97.334	0	0	0	0	0	1	0	0	0	0	0	0	0	0	0	0	0	0	0	0	0	0	0	0	0	0	0	0	0	0	0	0	0	0	0	0	0	0	0	0	0	0	0	0	0	0	0	0	0
OTU_97.525	0	0	0	0	0	0	0	0	0	0	0	0	0	0	0	0	0	0	0	0	0	0	0	0	0	0	0	0	0	0	0	0	0	0	0	0	0	0	0	0	0	0	0	0	0	0	0	0	0
OTU_97.624	0	0	0	0	0	0	0	0	0	0	0	0	0	0	0	0	0	0	0	0	0	0	0	0	0	0	0	0	0	0	0	0	0	0	0	0	0	0	0	0	0	0	0	0	0	0	0	0	0
OTU_97.661	0	0	0	0	0	0	0	0	0	0	0	0	0	0	0	1	0	0	0	0	0	0	0	0	0	0	0	0	0	0	0	0	0	0	0	0	0	0	0	0	0	0	0	0	0	0	0	0	0
OTU_97.234	0	0	0	0	0	0	0	0	0	0	0	0	0	0	0	0	0	0	0	0	0	0	0	0	0	0	0	0	0	0	0	0	0	0	0	0	0	0	0	0	0	0	0	0	0	0	0	0	0
OTU_97.282	0	0	0	0	0	0	0	0	1	0	0	0	1	0	0	0	0	0	1	1	0	0	1	0	0	0	0	0	12	0	0	0	0	0	0	0	0	0	0	1	0	0	0	0	0	0	0	0	0
OTU_97.437	0	0	0	0	0	0	0	0	0	0	0	0	0	0	0	0	0	0	0	0	0	0	0	0	0	0	0	0	0	0	0	0	0	0	0	0	0	1	0	0	0	0	0	0	0	1	0	0	0
OTU_97.146	0	36	0	0	1	0	0	0	0	0	0	0	0	0	0	0	0	0	0	0	0	0	0	0	0	0	0	0	0	0	0	0	0	0	0	0	0	0	0	0	0	0	0	0	0	0	0	0	0
OTU_97.203	0	0	0	0	0	7	0	0	0	0	0	0	0	0	0	0	0	0	0	0	0	1	0	0	0	0	0	0	0	0	0	0	0	0	0	0	0	0	0	0	0	0	0	0	0	0	0	0	0
OTU_97.262	0	1	0	0	0	0	0	0	0	0	0	0	0	0	0	0	0	0	0	0	0	0	0	0	0	0	0	0	0	0	0	0	0	0	0	0	0	0	0	0	0	0	0	0	0	0	0	0	0
OTU_97.270	0	0	0	0	0	0	0	0	0	0	0	0	0	0	0	0	0	0	0	0	0	0	0	0	0	0	0	0	0	0	0	0	0	0	0	0	0	0	0	0	0	0	0	0	0	0	0	0	0
OTU_97.321	0	0	0	0	0	0	1	1	3	0	0	0	0	0	0	0	0	0	1	4	0	0	0	0	2	0	0	0	0	0	0	0	0	0	0	0	0	1	0	0	0	1	0	0	0	0	0	0	0
OTU_97.322	0	0	1	0	0	0	0	0	0	0	0	0	0	0	0	0	0	0	0	6	0	0	0	0	0	0	0	0	0	0	0	0	0	0	0	0	0	0	2	0	0	0	0	0	0	0	0	0	0
OTU_97.347	0	0	0	0	0	0	0	0	0	0	0	0	0	0	0	0	0	0	0	0	0	0	0	0	0	0	0	0	0	0	0	0	0	0	0	0	0	0	0	0	0	0	0	0	0	0	0	0	0
OTU_97.355	0	0	0	0	0	0	0	0	0	0	0	0	0	0	0	1	0	0	0	0	0	0	0	0	0	0	0	0	0	0	0	0	0	0	0	0	0	1	0	0	0	0	0	0	0	0	0	0	0
OTU_97.384	0	0	0	0	0	0	0	0	0	0	0	0	0	0	0	1	0	0	0	0	0	0	0	0	0	0	0	0	1	0	0	0	0	0	0	0	0	0	0	0	0	0	0	1	0	0	1	0	0
OTU_97.508	0	0	0	0	2	0	0	0	0	1	2	0	0	0	0	0	0	0	1	0	0	0	0	0	0	0	0	0	0	0	0	1	0	0	0	1	0	0	0	0	0	0	0	0	0	0	0	0	0
OTU_97.576	0	0	0	0	0	0	2	0	0	0	0	0	0	0	0	0	0	0	0	0	0	0	0	0	0	0	0	0	0	0	0	0	0	0	0	0	0	0	0	0	0	0	0	0	0	0	0	0	1
OTU_97.599	0	0	0	0	0	0	0	0	0	0	0	0	0	0	2	0	0	0	0	0	0	0	0	0	0	0	0	0	0	0	0	0	0	0	0	1	0	0	1	0	0	0	0	1	0	0	0	0	0
OTU_97.664	0	0	0	0	0	0	0	0	0	0	0	0	0	1	0	0	1	0	0	0	0	0	0	0	0	0	0	0	0	0	1	0	0	0	0	0	0	0	0	0	0	0	0	0	0	0	0	0	0
OTU_97.304	0	0	0	0	0	0	0	0	0	0	0	0	0	0	0	0	0	0	0	0	0	0	0	0	0	0	0	0	0	0	0	0	0	0	0	0	0	0	0	0	0	0	0	0	0	0	0	0	1
OTU_97.349	0	0	0	0	0	0	0	0	0	0	0	0	0	0	0	0	0	0	0	0	0	0	0	0	0	0	0	0	0	0	0	0	0	0	0	0	0	0	0	0	0	0	0	0	0	0	0	0	0
OTU_97.357	0	1	0	0	0	0	0	0	0	0	0	0	0	0	0	0	0	0	0	0	0	0	0	0	0	0	0	0	0	0	0	0	0	0	0	0	0	0	0	0	0	0	0	0	0	0	0	0	0
OTU_97.408	0	0	0	0	0	0	0	0	0	0	0	0	0	0	0	0	0	0	0	0	0	0	0	0	0	0	0	0	0	0	0	0	0	0	0	0	0	0	0	0	0	0	0	0	0	0	1	0	0
OTU_97.451	0	0	0	0	0	0	0	0	0	0	0	0	0	3	0	0	0	0	0	0	0	0	0	0	0	0	0	0	0	0	0	0	0	0	0	0	0	0	0	0	0	0	0	0	0	0	0	0	0
OTU_97.478	0	0	0	0	0	0	0	0	0	0	0	0	0	0	0	0	0	0	0	0	0	0	0	0	0	0	0	0	0	0	0	0	0	0	0	0	0	0	0	0	0	0	0	0	0	0	0	0	0
OTU_97.502	0	0	1	0	0	0	0	0	0	0	0	0	0	0	0	0	0	0	0	0	0	0	0	0	0	0	0	0	0	0	0	0	0	0	0	0	0	0	0	0	0	0	0	0	0	0	0	0	0
OTU_97.559	0	0	0	0	0	0	0	0	0	0	0	0	0	0	0	0	0	0	0	0	0	0	0	0	0	0	0	0	0	0	0	0	0	0	0	0	0	0	0	0	0	0	0	0	0	0	0	0	0
OTU_97.605	0	0	0	0	0	0	0	0	0	1	0	0	0	0	0	1	0	1	0	0	0	0	0	0	0	0	0	0	0	0	0	0	0	0	0	0	0	0	0	0	0	0	0	0	0	0	0	0	0
OTU_97.665	0	0	0	0	0	0	0	0	0	0	0	0	0	0	0	0	0	0	0	0	0	0	0	0	0	0	0	0	0	0	0	0	0	0	0	0	0	0	0	0	0	0	0	0	0	0	0	0	0
OTU_97.161	0	4	0	0	0	0	0	0	0	0	0	0	0	0	0	0	0	0	0	0	0	0	0	0	0	0	0	0	0	0	0	0	0	0	0	0	0	0	0	0	0	0	0	0	0	0	0	0	0
OTU_97.251	0	0	0	0	0	0	0	0	0	0	0	0	0	0	0	0	0	0	0	0	0	0	0	0	0	0	0	0	0	0	0	0	0	0	0	0	0	0	0	0	0	0	0	0	0	0	0	0	0
OTU_97.331	0	0	0	0	0	0	0	0	0	0	0	0	0	0	0	0	0	0	0	0	0	0	0	0	0	0	0	0	0	0	0	0	0	0	0	0	0	7	0	0	0	0	0	0	0	0	0	0	0
OTU_97.356	0	0	0	0	0	0	0	0	0	0	0	0	0	0	0	0	0	0	0	0	0	0	0	0	0	0	0	0	0	0	0	0	0	0	0	1	0	0	0	0	0	0	0	0	0	0	0	0	0
OTU_97.362	0	0	0	0	0	0	0	0	0	0	0	0	0	1	0	0	0	0	0	0	0	0	0	0	0	0	0	0	0	0	0	0	0	0	0	0	0	0	0	0	0	0	0	0	0	0	0	0	0
OTU_97.367	0	1	0	0	0	0	0	0	0	0	0	0	0	0	0	0	0	0	0	0	0	0	0	0	0	0	0	0	0	0	0	0	0	0	0	0	0	0	0	0	0	0	0	0	0	0	0	0	0
OTU_97.371	0	0	0	0	0	0	0	2	0	0	0	0	0	0	0	0	0	0	0	0	0	0	0	0	0	0	0	0	0	0	0	0	0	0	0	0	0	0	0	0	0	0	0	0	0	0	0	0	0
OTU_97.389	0	0	0	0	0	0	0	0	0	0	0	0	0	0	0	0	0	0	0	0	0	0	0	1	0	0	0	0	0	0	0	1	0	0	0	0	0	0	0	1	0	0	0	0	0	0	0	0	0
OTU_97.405	0	0	0	0	0	0	0	0	0	0	0	0	2	1	0	0	0	0	0	0	0	0	0	0	0	0	0	0	0	0	0	0	0	0	0	0	0	0	0	1	0	0	0	0	0	0	0	0	0
OTU_97.409	0	0	0	0	0	2	0	0	0	0	0	0	1	0	0	0	0	0	0	0	0	0	0	0	0	0	0	0	0	0	0	0	0	0	3	0	0	0	0	0	0	0	0	0	0	0	0	0	0
OTU_97.410	0	2	0	0	0	0	0	0	0	0	0	0	0	2	0	0	0	0	0	0	0	0	0	0	0	0	0	0	0	0	0	0	0	0	0	0	0	1	0	0	0	0	0	0	0	0	0	0	0
OTU_97.637	0	0	0	0	0	1	0	0	0	0	0	1	0	0	0	0	0	0	0	0	0	0	0	0	0	0	0	0	0	0	0	0	0	0	0	0	0	0	1	0	0	0	0	0	0	0	0	0	0
OTU_97.166	0	0	0	0	0	0	0	0	0	0	0	0	0	0	0	0	0	0	0	0	0	0	0	0	0	0	0	0	0	0	0	0	0	0	0	0	0	0	0	0	0	0	0	0	0	0	0	0	0
OTU_97.317	0	0	0	0	0	0	0	0	0	0	0	0	2	0	0	0	0	0	0	0	0	0	0	0	0	0	0	1	0	0	1	0	0	0	0	0	0	0	0	0	0	0	0	0	0	0	0	0	0
OTU_97.373	0	0	0	0	0	0	0	0	0	0	0	0	0	0	0	0	0	1	0	0	0	0	0	0	0	0	0	5	0	0	0	0	0	0	0	0	0	0	0	0	0	0	0	0	0	0	0	0	0
OTU_97.390	0	0	0	0	0	0	0	0	0	0	0	0	0	0	0	0	0	0	0	0	0	0	0	0	0	0	0	0	0	0	0	0	0	0	0	0	0	0	0	0	0	0	0	0	0	0	0	0	0
OTU_97.412	0	0	1	0	0	0	0	0	0	0	0	0	0	0	0	0	0	0	0	0	0	1	0	0	0	0	0	0	0	0	0	0	0	0	0	0	0	0	0	0	0	0	0	0	0	0	0	0	0
OTU_97.429	0	0	0	0	0	0	0	0	0	0	0	1	0	0	0	0	0	0	0	0	0	0	0	0	0	0	0	0	0	0	0	0	0	0	0	0	0	0	0	0	1	0	0	0	0	0	0	0	0
OTU_97.491	0	1	0	0	0	0	0	0	0	0	0	0	0	0	0	0	0	0	0	0	0	0	0	0	0	0	0	0	0	0	0	0	0	0	0	0	0	0	0	0	0	0	0	0	0	0	0	0	0
OTU_97.523	0	0	1	0	0	0	0	0	0	0	0	0	0	0	0	0	0	0	0	0	0	0	0	0	0	0	0	0	0	0	0	0	0	0	0	0	0	0	0	0	1	0	0	0	0	0	0	0	0
OTU_97.640	0	0	0	0	0	0	0	0	0	0	0	0	0	0	0	0	0	1	0	0	0	0	0	0	0	0	0	0	0	0	0	0	0	0	0	0	0	0	0	0	0	0	0	0	0	0	0	0	0
OTU_97.656	0	1	0	0	0	0	0	0	0	0	0	0	0	0	0	0	0	0	0	0	0	0	0	0	0	0	0	0	0	0	0	0	0	0	0	0	0	0	0	0	0	0	0	0	0	0	0	0	0
OTU_97.240	0	4	0	0	0	0	0	0	0	0	0	0	0	0	0	0	0	0	0	0	0	0	0	0	0	0	0	0	0	0	0	0	0	0	0	0	0	0	0	0	0	0	0	0	0	0	0	0	0
OTU_97.241	0	0	0	0	0	0	0	0	0	6	3	0	0	0	0	0	22	1	1	1	0	0	0	0	0	0	0	0	0	0	0	0	0	0	0	0	0	0	0	0	0	0	0	0	0	0	0	0	0
OTU_97.320	0	4	0	0	0	0	0	0	0	0	0	0	0	0	0	0	0	0	0	0	0	0	0	0	0	0	0	0	0	0	0	0	0	0	0	0	0	0	0	0	0	0	0	0	0	0	0	0	0
OTU_97.358	0	0	0	0	0	0	0	0	0	0	0	0	0	0	0	0	0	0	0	0	0	0	0	0	0	0	0	0	0	0	0	0	0	0	0	0	0	0	0	0	0	0	0	0	0	0	0	0	0
OTU_97.365	0	0	0	0	0	1	0	0	0	0	0	0	0	0	0	0	0	0	0	0	0	0	0	0	0	0	0	0	0	0	0	0	0	0	1	0	0	0	2	0	0	0	0	0	0	0	0	0	0
OTU_97.469	0	5	0	0	0	0	0	0	0	0	0	0	0	0	0	0	0	0	0	0	0	0	0	0	0	0	0	0	0	0	0	0	0	0	0	0	0	0	0	0	0	0	0	0	0	0	0	0	0
OTU_97.494	0	0	0	0	0	0	0	0	0	0	1	0	0	0	0	0	0	0	0	0	0	0	0	0	0	0	0	0	0	0	0	0	0	0	0	0	0	0	0	0	0	0	0	0	0	0	0	0	0
OTU_97.518	0	0	0	0	0	0	0	0	0	0	0	0	0	0	0	0	0	0	0	0	0	0	0	0	0	0	0	0	0	0	0	0	0	0	0	0	0	0	0	0	0	0	0	0	0	0	0	0	0
OTU_97.566	0	0	0	0	0	0	0	0	0	0	0	0	0	0	0	0	0	0	0	0	0	0	0	0	0	0	0	0	0	0	0	1	0	1	0	0	0	0	0	0	0	0	1	0	0	0	0	0	0
OTU_97.603	0	0	0	0	0	0	0	0	0	0	0	0	2	0	0	0	0	0	0	0	1	0	0	0	0	0	0	0	0	0	0	2	0	0	0	1	0	0	0	0	0	1	1	0	0	0	0	3	0
OTU_97.345	0	0	0	0	0	0	0	0	0	0	0	0	0	0	0	0	0	0	0	0	0	0	0	0	0	0	0	0	0	1	1	0	0	0	0	0	0	0	0	0	0	0	0	0	0	0	0	0	7
OTU_97.370	0	0	0	0	0	0	0	0	0	0	0	0	6	0	0	0	0	0	0	0	0	0	0	0	0	0	0	0	0	0	0	0	0	0	0	0	0	0	0	0	0	0	0	0	0	0	0	0	0
OTU_97.395	0	0	0	0	0	0	0	0	0	0	0	0	0	1	0	0	0	0	0	0	0	0	0	0	0	0	0	0	0	0	0	0	1	0	0	0	0	0	0	0	0	0	0	0	0	0	0	0	0
OTU_97.420	0	0	0	0	0	0	0	0	0	0	0	2	0	0	0	0	0	0	0	0	0	0	0	0	10	0	0	0	0	0	0	0	0	0	0	0	0	0	0	0	0	0	0	0	0	0	0	0	0
OTU_97.430	0	0	0	0	1	0	0	0	0	0	0	1	0	0	0	0	0	0	0	0	0	0	0	0	0	0	0	0	0	0	0	0	0	0	0	0	0	0	0	0	0	0	0	0	0	0	0	0	0
OTU_97.431	0	0	0	0	0	0	0	0	0	0	0	0	0	0	0	0	0	0	0	0	0	0	0	0	0	0	0	0	0	0	0	0	0	0	0	0	0	0	0	0	0	0	0	0	0	0	0	0	0
OTU_97.438	0	0	0	0	0	0	0	0	0	0	0	0	2	0	0	0	0	0	0	0	0	0	1	0	0	0	0	0	0	0	0	0	0	0	0	0	0	0	0	0	0	0	0	0	0	0	0	0	0
OTU_97.443	0	0	0	0	0	0	0	0	0	0	0	0	0	0	0	0	0	0	0	0	0	0	0	0	0	0	0	0	0	0	0	0	0	0	0	0	0	0	0	0	0	0	0	0	0	0	1	0	0
OTU_97.484	0	0	0	0	0	0	0	0	0	0	0	0	0	0	0	0	0	0	1	0	0	0	0	0	0	0	0	0	0	0	0	0	0	0	0	0	0	0	0	0	0	0	0	0	0	0	0	0	0
OTU_97.542	0	0	0	0	0	0	0	0	0	0	0	0	0	1	0	0	0	0	0	0	0	0	0	0	0	0	0	0	0	0	0	0	0	0	0	0	0	0	1	0	0	0	0	0	0	0	0	0	0
OTU_97.564	0	0	0	0	0	0	0	0	0	0	0	0	0	0	0	0	0	0	0	0	0	0	0	0	0	0	0	0	0	0	0	0	0	0	0	0	0	0	0	0	0	0	0	0	0	0	0	0	0
OTU_97.636	0	0	0	0	0	0	0	0	0	0	0	0	0	0	0	0	0	0	0	0	0	0	0	0	0	0	0	0	0	0	0	0	0	0	0	0	0	0	0	0	0	0	0	0	0	0	0	0	0
OTU_97.301	0	9	0	0	0	0	0	0	0	0	0	0	0	0	0	0	0	0	0	0	0	0	0	0	0	0	0	0	0	0	0	0	0	0	0	0	0	0	0	0	0	0	0	0	0	0	0	0	0
OTU_97.383	0	0	0	0	0	0	0	0	0	0	0	0	0	0	0	0	0	0	0	0	0	0	0	0	0	0	0	0	0	0	0	0	0	0	0	0	0	0	0	0	0	0	0	0	0	0	0	0	0
OTU_97.424	0	0	0	0	0	0	0	0	0	0	0	0	0	0	0	0	0	0	0	0	0	0	0	0	0	0	0	0	0	0	0	0	0	0	0	0	0	0	0	0	0	0	0	0	0	0	0	0	0
OTU_97.425	0	0	0	0	0	0	0	0	0	0	0	0	0	0	0	0	0	0	0	0	0	0	0	0	0	0	0	0	0	0	0	0	0	0	0	0	0	0	0	0	0	0	0	0	0	0	0	0	0
OTU_97.435	0	0	0	0	0	0	0	0	0	0	0	0	0	0	0	0	0	0	0	0	0	0	0	0	0	0	0	0	0	0	0	0	0	0	0	0	0	2	0	0	0	0	0	0	0	0	0	0	0
OTU_97.445	0	0	0	0	0	0	0	0	0	0	0	0	0	0	0	0	0	0	0	0	0	0	0	0	0	0	0	0	0	0	0	0	0	0	0	0	0	0	0	0	0	0	0	0	0	0	0	0	0
OTU_97.446	0	0	0	0	0	1	0	0	0	0	0	0	0	0	0	0	0	0	0	0	0	0	0	0	0	0	0	0	0	0	0	0	0	0	0	0	0	0	0	0	0	0	0	0	0	0	0	0	0
OTU_97.462	0	0	0	0	0	1	0	0	0	2	0	0	0	0	0	0	0	0	0	0	0	1	0	0	0	0	0	0	0	0	0	0	0	0	0	0	0	0	0	0	0	0	0	0	0	1	0	0	0
OTU_97.485	0	0	0	0	0	0	0	0	0	0	0	0	0	0	0	0	0	0	0	0	0	0	0	0	0	0	0	0	0	0	0	0	0	0	0	0	0	0	0	0	0	0	0	0	0	1	0	0	0
OTU_97.50	0	0	0	0	0	0	0	0	0	0	0	0	0	0	0	0	0	0	0	0	0	0	0	0	0	0	0	0	0	0	0	0	568	0	0	0	0	0	0	1	0	0	0	0	0	0	0	0	0
OTU_97.506	0	1	0	0	0	0	0	0	0	0	0	0	0	0	0	0	0	0	0	0	0	0	0	0	0	0	0	0	0	0	0	0	0	0	0	0	0	0	0	0	0	0	0	0	0	0	0	0	0
OTU_97.513	0	1	0	0	0	0	0	0	0	0	0	0	0	0	0	0	0	0	0	0	0	0	0	0	0	0	0	0	0	0	0	0	0	0	0	0	0	0	0	0	0	0	0	0	0	0	0	0	0
OTU_97.517	0	0	0	0	0	0	0	0	0	0	0	0	0	0	0	0	0	0	0	0	0	0	0	0	0	0	0	0	0	0	0	0	0	0	0	0	0	0	0	0	0	0	0	0	0	0	0	0	0
OTU_97.659	0	0	0	0	0	0	0	0	0	0	0	6	0	0	0	0	0	0	0	0	0	0	0	0	0	0	0	0	0	0	0	0	0	0	0	0	0	0	0	0	0	0	0	0	0	0	0	0	0
OTU_97.335	0	0	0	0	0	0	0	0	0	0	0	0	0	0	0	0	0	0	0	0	0	0	0	0	0	0	0	0	0	0	0	0	0	0	0	0	0	0	0	0	0	0	0	0	0	0	0	0	0
OTU_97.439	0	0	0	0	0	0	0	0	0	0	0	0	0	0	0	0	0	0	0	0	0	0	0	0	0	0	0	0	0	0	0	0	0	0	0	0	0	0	0	0	0	0	0	0	0	0	0	0	0
OTU_97.474	0	0	0	0	0	0	0	0	0	0	0	0	0	0	0	0	0	0	0	0	0	0	0	0	0	0	0	0	0	0	0	0	0	0	0	0	0	0	0	0	0	0	0	0	0	0	0	0	0
OTU_97.527	1	0	0	0	0	0	0	0	0	0	0	0	0	0	0	0	0	0	0	0	0	0	0	0	0	0	0	0	0	0	0	0	0	0	0	0	0	0	0	1	0	0	0	0	0	0	0	0	0
OTU_97.530	0	0	0	0	0	0	0	0	0	0	0	0	0	0	0	0	0	0	0	0	0	0	0	0	0	0	0	0	0	0	0	0	0	0	0	0	0	0	0	0	0	0	0	0	0	0	0	0	0
OTU_97.573	0	0	0	0	0	0	0	0	0	0	0	0	0	0	0	0	0	0	0	0	0	0	0	0	0	0	0	0	0	0	0	0	0	0	0	0	0	0	0	0	0	0	0	0	0	0	1	0	0
OTU_97.612	0	0	0	0	0	0	0	0	0	0	0	0	0	0	0	0	0	0	0	0	0	0	0	1	0	0	0	0	0	0	0	0	0	0	0	0	0	0	0	0	0	0	0	0	0	0	0	0	0
OTU_97.646	0	0	0	0	1	0	0	0	0	0	0	0	0	0	1	0	0	0	0	0	0	0	0	0	0	0	0	0	0	0	0	0	0	0	0	0	0	0	0	0	0	0	0	0	0	1	0	0	0
OTU_97.658	0	0	0	0	1	0	0	0	0	0	0	1	0	0	0	0	0	0	0	0	0	0	0	0	0	0	0	0	0	0	0	0	0	0	0	0	0	0	0	0	0	0	1	0	0	0	3	0	0
OTU_97.191	1	0	0	0	0	0	0	0	0	0	0	0	0	0	0	0	0	0	0	0	0	0	0	0	0	0	0	0	0	0	0	0	0	0	0	0	0	0	0	6	0	0	0	0	0	0	0	0	0
OTU_97.220	0	0	0	0	0	0	0	0	0	0	0	0	0	0	0	0	0	0	0	0	0	0	0	0	0	0	0	0	0	0	0	0	0	0	0	0	0	0	0	0	0	0	0	0	0	0	0	0	0
OTU_97.375	0	0	0	0	0	0	0	0	0	0	0	0	0	0	0	0	0	0	0	0	0	0	0	0	0	0	0	0	0	0	0	0	0	0	0	0	0	0	0	0	0	0	0	0	0	0	0	0	0
OTU_97.414	0	0	0	0	0	0	0	0	0	0	0	0	0	0	0	0	0	0	0	0	0	0	0	0	0	0	0	0	0	0	0	0	0	0	0	0	0	0	0	0	0	0	0	0	0	0	0	0	0
OTU_97.449	0	3	0	0	0	0	0	0	0	0	0	0	0	0	0	0	0	0	0	0	0	0	0	0	0	0	0	0	0	0	0	0	0	0	0	0	0	0	0	0	0	0	0	0	0	0	0	0	0
OTU_97.492	0	2	0	0	0	0	0	0	0	0	0	0	0	0	0	0	0	0	0	0	0	0	0	0	0	0	0	0	0	0	0	0	0	0	0	0	0	0	0	0	0	0	0	0	0	0	0	0	0
OTU_97.510	0	0	0	0	0	0	0	0	0	0	0	0	0	0	0	0	0	0	0	0	0	0	0	0	0	0	0	0	0	0	0	0	0	0	0	0	0	0	0	0	0	0	0	0	0	0	0	0	0
OTU_97.526	0	0	0	0	0	0	0	0	0	0	0	0	0	0	0	0	0	0	0	0	0	0	0	0	0	0	0	0	0	0	0	0	0	0	0	0	0	0	0	0	0	0	0	0	0	0	0	0	0
OTU_97.539	0	0	0	0	0	0	0	0	0	0	0	0	0	0	0	0	0	0	0	0	0	0	0	0	0	0	0	0	0	0	0	0	0	0	0	0	0	0	0	0	0	0	0	0	0	0	0	0	0
OTU_97.552	0	1	0	0	0	0	0	0	0	0	0	0	0	0	0	0	0	0	0	0	0	0	0	0	0	0	0	0	0	0	0	0	0	0	0	0	0	1	0	0	0	0	0	0	0	0	0	0	0
OTU_97.558	0	0	0	0	0	0	0	0	0	0	0	0	0	0	0	0	0	0	0	0	0	0	0	0	0	0	0	0	0	0	0	0	0	0	0	0	0	0	0	0	0	0	0	0	0	0	0	0	0
OTU_97.586	0	0	0	0	0	0	0	0	0	0	0	0	0	0	0	0	0	0	0	0	0	0	0	0	0	0	0	0	0	0	0	0	0	0	0	0	0	0	0	0	0	0	0	0	0	0	0	0	0
OTU_97.589	0	0	0	0	0	0	0	0	0	0	0	0	0	0	0	0	0	0	0	0	0	0	0	0	0	0	0	0	0	0	0	0	0	0	0	0	0	0	0	0	0	0	0	0	0	0	0	0	0
OTU_97.617	0	0	0	0	0	0	0	0	0	0	0	0	0	0	0	0	0	0	0	0	0	0	0	0	0	0	0	0	0	0	0	0	0	0	1	0	0	0	0	0	0	0	0	0	0	0	0	0	0
OTU_97.629	0	0	0	0	0	0	0	0	0	0	0	0	0	0	0	0	0	0	0	0	0	0	0	0	0	0	0	0	0	0	0	0	0	0	0	0	0	0	0	0	0	0	0	0	0	0	0	0	0
OTU_97.647	0	0	0	0	0	0	0	0	0	0	0	0	0	0	0	0	0	0	0	0	0	0	0	0	0	0	0	0	0	0	0	0	0	0	0	0	0	0	0	0	0	0	0	0	0	0	0	0	0
OTU_97.95	0	0	0	0	0	0	0	0	0	0	0	0	0	0	0	0	0	0	0	0	0	0	0	0	0	0	0	0	2	0	0	0	0	0	0	0	0	0	0	0	0	0	0	0	0	0	0	0	0
OTU_97.177	0	0	0	0	0	0	0	0	0	0	0	0	0	0	0	0	0	0	0	0	0	0	0	0	0	0	0	0	0	0	0	0	0	0	0	0	0	0	0	5	0	0	0	0	0	0	0	0	0
OTU_97.337	0	13	0	0	0	0	0	0	0	0	0	0	0	0	0	0	0	0	0	0	0	0	0	0	0	0	0	0	0	0	0	0	0	0	0	0	0	0	0	0	0	0	0	0	0	0	0	0	0
OTU_97.340	0	0	0	0	0	0	0	0	0	0	0	0	0	0	0	0	0	0	0	0	0	0	0	0	0	0	0	0	0	0	0	0	0	0	0	0	0	0	0	0	0	0	0	2	0	0	0	0	0
OTU_97.382	0	0	0	0	0	0	0	0	0	0	0	0	0	0	0	0	0	0	0	0	0	0	0	0	0	0	0	0	0	0	0	0	0	0	0	0	0	0	0	1	0	0	0	0	0	0	0	0	0
OTU_97.411	0	0	0	0	0	0	0	0	0	0	0	0	0	0	0	0	0	0	0	0	0	0	0	0	0	0	0	0	0	0	0	0	0	0	0	0	0	0	0	0	0	0	0	0	0	0	0	0	0
OTU_97.434	0	0	0	0	0	0	0	0	0	0	0	0	0	0	0	0	0	0	0	0	0	0	0	0	0	0	0	0	0	0	0	0	0	0	0	0	0	0	0	0	0	0	0	0	0	0	0	0	0
OTU_97.436	0	0	0	0	0	0	0	0	0	0	0	0	0	0	0	0	0	0	0	0	0	0	0	0	0	2	0	0	0	0	0	0	0	0	0	0	0	0	0	0	0	0	0	0	0	0	0	0	0
OTU_97.454	0	0	0	0	0	0	0	0	0	0	0	0	0	0	0	0	0	0	0	0	0	0	0	0	0	0	0	0	0	0	0	0	0	0	0	0	0	0	0	0	0	0	0	0	0	0	0	0	0
OTU_97.465	0	0	0	0	0	0	0	0	0	0	0	0	0	0	0	0	0	0	0	0	0	0	0	0	0	0	0	0	0	0	0	0	0	0	0	0	0	0	0	0	0	0	0	0	0	0	0	0	0
OTU_97.487	0	0	0	0	0	0	0	0	0	0	0	0	0	0	0	0	0	0	0	0	0	0	0	0	0	0	0	0	0	0	0	0	0	0	0	0	0	0	0	0	0	0	0	0	0	0	0	0	0
OTU_97.497	0	0	0	0	0	0	0	0	0	0	0	0	0	0	0	0	0	0	0	0	0	0	0	0	0	0	0	0	0	0	0	0	0	0	0	0	0	0	0	0	0	0	0	0	0	0	0	0	0
OTU_97.519	0	0	0	0	0	2	0	0	0	0	0	0	0	0	0	0	0	0	0	0	0	0	0	0	0	0	0	0	0	0	0	0	0	0	0	0	0	0	0	0	0	0	0	0	0	0	0	0	0
OTU_97.531	0	0	0	0	0	0	0	0	0	0	0	0	0	0	0	0	0	0	0	0	0	0	0	0	0	0	0	0	0	0	0	0	0	0	0	0	0	0	0	0	0	0	0	0	0	0	0	0	0
OTU_97.549	0	0	0	0	0	0	0	0	0	0	0	0	1	0	0	0	0	0	0	0	0	0	0	0	0	0	0	0	0	0	0	0	0	0	0	0	0	0	0	0	0	0	0	0	0	0	0	0	0
OTU_97.553	0	0	0	0	0	0	0	0	0	0	0	0	0	0	0	0	0	0	0	0	0	0	0	0	0	0	0	0	0	0	0	0	0	0	0	0	0	3	0	0	0	0	0	0	0	0	0	0	0
OTU_97.567	0	2	0	0	0	0	0	0	0	0	0	0	0	0	0	0	0	0	0	0	0	0	0	0	0	0	0	0	1	0	0	0	0	0	0	0	0	0	0	0	0	0	0	0	0	0	0	0	0
OTU_97.584	0	0	0	0	0	0	0	0	0	0	0	0	0	0	0	0	0	0	0	0	0	0	0	0	0	0	0	0	0	0	0	0	0	0	0	0	0	0	0	0	0	0	0	0	0	0	0	0	0
OTU_97.588	0	0	0	0	0	0	0	0	0	0	0	0	0	0	0	0	0	0	0	0	0	0	0	0	0	1	0	0	0	0	0	0	0	0	0	0	0	0	0	0	0	0	0	0	0	0	0	0	0
OTU_97.597	0	0	0	0	0	0	0	0	0	0	0	0	0	0	0	0	0	0	0	0	0	0	0	0	0	0	0	0	0	0	0	0	0	0	0	0	0	0	0	0	0	0	0	0	0	0	0	0	0
OTU_97.614	0	0	0	0	0	0	0	0	0	0	0	0	0	0	0	0	0	0	0	0	0	0	0	0	0	0	0	0	0	0	0	0	0	0	0	0	0	0	0	0	0	0	0	0	0	0	0	0	0
OTU_97.631	0	0	0	0	0	2	0	0	0	0	0	0	0	0	0	0	0	0	0	0	0	0	0	0	0	0	0	0	0	0	0	0	0	0	0	0	0	0	0	0	0	0	0	0	0	0	0	0	0
OTU_97.644	1	0	0	0	0	0	0	0	0	0	0	0	0	0	0	0	0	0	0	0	0	0	0	0	0	0	0	0	0	0	0	0	0	0	0	0	0	0	0	0	0	0	0	0	0	0	0	0	0
OTU_97.655	0	0	0	0	0	0	0	0	0	0	0	0	0	0	0	0	0	0	0	0	0	0	0	0	0	0	0	0	0	0	0	0	0	0	0	0	0	0	0	0	0	0	0	0	0	0	0	0	0
OTU_97.666	0	0	0	0	0	0	0	0	0	0	0	0	0	0	0	0	0	0	0	0	0	0	0	0	0	0	0	0	0	0	0	0	0	0	0	0	0	0	0	0	0	0	0	0	0	0	0	0	0
OTU_97.670	0	0	0	0	0	0	0	0	0	0	0	0	0	0	0	0	0	0	0	0	0	0	0	0	0	0	0	0	0	0	0	0	0	0	0	0	0	0	0	0	0	0	0	0	0	0	0	0	0
OTU_97.680	0	0	0	0	0	0	0	0	0	0	0	0	0	1	0	0	0	0	0	0	0	0	0	0	0	0	0	0	0	0	0	0	0	0	0	0	0	0	0	0	0	0	0	0	0	0	0	0	0
OTU_97.200	0	0	0	0	0	0	0	0	0	0	0	0	0	0	0	0	0	0	0	0	0	0	0	0	0	0	0	0	0	0	0	0	0	0	0	0	0	0	0	0	0	0	0	0	0	0	0	0	0
OTU_97.386	0	0	0	0	0	0	0	0	0	0	0	0	0	0	0	0	0	0	0	0	0	0	0	0	0	0	0	0	0	0	0	0	1	0	0	0	0	0	0	0	0	0	0	0	0	0	0	0	0
OTU_97.419	0	0	0	0	0	0	0	0	0	0	0	0	0	0	0	0	0	0	0	0	0	0	0	0	0	0	0	0	0	0	0	0	0	0	0	0	0	0	0	0	0	0	0	0	0	0	0	0	0
OTU_97.488	0	0	0	0	0	0	0	0	0	0	0	0	0	0	0	0	0	0	0	0	0	0	0	0	0	0	0	0	0	0	0	0	0	0	0	0	0	0	0	0	0	0	0	0	0	0	0	0	0
OTU_97.503	0	0	0	0	0	0	0	0	0	0	0	0	0	0	0	0	0	0	0	0	0	0	0	0	0	0	0	0	0	0	0	0	0	0	0	0	0	0	0	0	0	0	0	0	0	0	0	0	0
OTU_97.509	0	0	0	0	0	0	0	0	0	0	0	0	0	0	0	0	0	0	0	0	0	0	0	0	0	0	0	0	0	0	0	0	0	0	0	0	0	0	0	0	0	0	0	0	0	0	0	0	0
OTU_97.520	0	0	0	0	0	0	0	0	0	0	0	0	4	0	0	0	0	0	0	0	0	0	0	0	0	0	0	0	0	0	0	0	0	0	0	0	0	0	0	0	0	0	0	0	0	0	0	0	0
OTU_97.524	0	0	0	0	0	0	0	0	0	0	0	0	0	0	0	0	0	0	0	0	0	0	0	0	0	0	0	0	0	0	0	0	0	0	0	0	0	0	0	0	0	0	0	0	0	0	0	0	0
OTU_97.537	0	0	0	0	0	0	0	0	0	0	0	0	0	0	0	0	0	0	0	0	0	0	0	0	0	0	0	0	0	0	0	0	0	0	0	0	0	0	0	0	0	0	0	0	0	0	0	0	0
OTU_97.538	0	0	0	0	0	0	0	0	0	0	0	0	0	0	0	0	0	0	0	0	0	0	0	0	0	0	0	0	0	0	0	0	0	0	0	0	0	0	0	0	0	0	0	0	0	0	0	0	0
OTU_97.580	0	0	0	0	0	0	0	0	0	0	0	3	0	0	0	0	0	0	0	0	0	0	0	0	0	0	0	0	0	0	0	0	0	0	0	0	0	0	0	0	0	0	0	0	0	0	0	0	0
OTU_97.585	0	0	0	0	0	0	0	0	0	0	0	0	0	0	0	0	0	0	0	0	0	0	0	0	0	0	0	0	0	0	0	0	0	0	0	0	0	0	0	0	0	0	0	0	0	0	0	0	0
OTU_97.593	0	1	0	0	0	0	0	0	0	0	0	0	0	0	0	0	0	0	0	0	0	0	0	0	0	0	0	0	0	0	0	0	0	0	0	0	0	0	0	0	0	0	0	0	0	0	0	0	0
OTU_97.635	0	0	0	0	0	0	0	0	0	0	0	0	0	0	0	0	0	0	0	0	0	0	0	0	0	0	0	0	0	0	0	0	0	0	0	0	0	0	0	0	0	0	0	0	0	0	0	0	0
OTU_97.649	0	1	0	0	0	0	0	0	0	0	0	0	0	0	0	0	0	0	0	0	0	0	0	0	0	0	0	0	0	0	0	0	0	0	0	0	0	0	0	0	0	0	0	0	0	0	0	0	0
OTU_97.652	0	0	0	0	0	0	0	0	0	0	0	1	0	0	0	0	0	0	0	0	0	0	0	0	0	0	0	0	0	0	0	0	0	0	0	0	0	0	0	0	0	0	4	0	0	0	0	0	0
OTU_97.673	0	0	0	0	0	0	0	0	0	0	0	0	0	0	0	0	0	0	0	0	0	0	0	0	0	0	0	0	0	0	0	0	0	0	0	0	0	0	0	0	0	0	0	0	0	0	0	0	0
OTU_97.138	0	0	0	0	0	0	0	0	0	0	0	0	0	0	0	0	0	0	0	0	0	0	0	0	0	0	0	0	0	0	0	0	0	0	0	0	0	0	0	0	0	0	0	0	0	0	0	0	0
OTU_97.397	0	0	0	0	0	0	0	0	0	0	0	0	0	0	0	0	0	0	0	0	0	0	0	0	0	0	0	0	0	0	0	0	0	0	0	0	0	0	0	0	0	0	0	0	0	0	0	0	0
OTU_97.433	0	0	0	0	0	0	0	0	0	0	0	0	0	0	0	0	0	0	0	0	0	0	0	0	0	0	0	0	0	0	0	0	0	0	0	0	0	0	0	0	0	0	0	0	0	0	0	0	0
OTU_97.448	0	0	0	0	0	0	0	0	0	0	0	0	0	0	0	0	0	0	0	0	0	0	0	0	0	0	0	0	0	0	0	0	0	0	0	0	0	0	0	0	0	0	0	0	0	0	0	0	0
OTU_97.496	0	0	0	0	0	0	0	0	0	0	0	0	0	0	0	0	0	0	0	0	0	0	0	0	0	0	0	0	0	0	0	0	0	0	0	0	0	0	0	0	0	0	0	0	0	0	0	0	0
OTU_97.532	0	0	0	0	0	0	0	0	0	0	0	0	0	0	0	0	0	0	0	0	0	0	0	0	0	0	0	0	0	0	0	0	0	0	0	0	0	0	0	0	0	0	0	0	0	0	0	0	0
OTU_97.563	0	4	0	0	0	0	0	0	0	0	0	0	0	0	0	0	0	0	0	0	0	0	0	0	0	0	0	0	0	0	0	0	0	0	0	0	0	0	0	0	0	0	0	0	0	0	0	0	0
OTU_97.609	0	0	0	0	0	0	0	0	0	0	0	0	0	0	0	0	0	0	0	0	0	0	0	0	0	0	0	0	0	0	0	0	0	0	0	0	0	0	0	0	0	0	0	0	0	0	0	0	0
OTU_97.634	0	0	0	0	0	0	0	0	0	0	0	0	0	0	0	0	0	0	0	0	0	0	0	0	0	0	0	0	0	0	0	0	0	0	0	0	0	0	0	0	0	0	0	0	0	0	0	0	0
OTU_97.651	0	0	0	0	0	0	0	0	0	0	0	0	0	0	0	0	0	0	0	0	0	0	0	0	0	0	0	0	0	0	0	0	0	0	0	0	0	0	0	0	0	0	0	0	0	0	0	0	0
OTU_97.653	0	3	0	0	0	0	0	0	0	0	0	0	0	0	0	0	0	0	0	0	0	0	0	0	0	0	0	0	0	0	0	0	0	0	0	0	0	0	0	0	0	0	0	0	0	0	0	0	0
OTU_97.657	0	0	0	0	0	0	0	0	0	0	0	0	0	0	0	0	0	0	0	0	0	0	0	0	0	0	0	0	0	0	0	0	0	0	0	0	0	0	0	0	0	0	0	0	0	0	0	0	0
OTU_97.674	0	0	0	0	0	0	0	0	0	1	0	4	0	0	0	0	0	0	0	0	0	0	0	0	0	0	0	0	0	0	0	0	0	0	0	0	0	0	0	0	0	0	0	0	0	0	0	0	0
OTU_97.675	0	0	0	0	0	0	0	0	0	0	0	0	0	0	0	0	0	0	0	0	0	0	0	0	0	0	0	0	0	0	0	0	0	0	0	0	0	0	0	0	0	0	0	0	0	0	0	0	0
OTU_97.201	0	0	0	0	0	0	0	0	0	0	0	0	0	0	0	0	0	0	0	0	0	0	0	0	0	0	0	0	0	0	0	0	0	0	0	0	0	0	0	0	0	0	0	0	0	0	0	0	0
OTU_97.312	0	0	0	0	0	0	0	0	0	0	0	0	0	0	0	0	0	0	0	0	0	0	0	0	0	0	0	0	0	0	0	0	0	0	0	0	0	0	0	0	0	0	0	0	0	0	0	0	0
OTU_97.328	0	0	0	0	0	0	0	0	0	0	0	0	0	0	0	0	0	0	0	0	0	0	0	0	0	0	0	0	0	0	0	0	0	0	0	0	0	0	0	0	0	0	0	0	0	0	0	0	0
OTU_97.360	0	0	0	0	0	0	0	0	0	0	0	0	0	0	0	0	0	0	0	0	0	0	0	0	0	0	0	0	0	0	0	0	0	0	0	0	0	0	0	0	0	0	0	0	0	0	0	0	0
OTU_97.361	0	0	0	0	0	0	0	0	0	0	0	0	0	0	0	0	0	0	0	0	0	0	0	0	0	0	0	0	0	0	0	0	0	0	0	0	0	0	0	0	0	0	0	0	0	0	0	0	0
OTU_97.364	0	0	0	0	0	0	0	0	0	0	0	0	0	0	0	0	0	0	0	0	0	0	0	0	0	0	0	0	0	0	0	0	0	0	0	0	0	0	0	0	0	0	0	0	0	0	0	0	0
OTU_97.385	0	0	0	0	0	0	0	0	0	0	0	0	0	0	0	0	0	0	0	0	0	0	0	0	0	0	0	0	0	0	0	0	0	0	0	0	0	0	0	0	0	0	0	0	0	0	0	0	0
OTU_97.387	0	0	0	0	0	0	0	0	0	0	0	0	0	0	0	0	0	0	0	0	0	0	0	0	0	0	0	0	0	0	0	0	0	0	0	0	0	0	0	0	0	0	0	0	0	0	0	0	0
OTU_97.452	0	0	0	0	0	0	0	0	0	0	0	0	0	0	0	0	0	0	0	0	0	0	0	0	0	0	0	0	0	0	0	0	0	0	0	0	0	0	0	0	0	0	0	0	0	0	0	0	0
OTU_97.458	0	0	0	0	0	0	0	0	0	0	0	0	0	0	0	0	0	0	0	0	0	0	0	0	0	0	0	0	0	0	0	0	0	0	0	0	0	9	0	0	0	0	0	0	0	0	0	0	0
OTU_97.533	0	0	0	0	0	0	0	0	0	0	0	0	0	0	0	0	0	0	0	0	0	0	0	0	0	0	0	0	0	0	0	0	0	0	0	0	0	0	0	0	0	0	0	0	0	0	0	0	0
OTU_97.541	0	0	0	0	0	0	0	0	0	0	0	0	0	0	0	0	0	0	0	0	0	0	0	0	0	0	0	0	0	0	0	0	0	0	0	0	0	0	0	0	0	0	0	0	0	0	0	0	0
OTU_97.561	0	0	0	0	0	0	0	0	0	0	0	0	0	0	0	0	0	0	0	0	0	0	0	0	0	0	0	0	0	0	0	0	0	0	0	0	0	0	0	0	0	0	0	0	0	0	0	0	0
OTU_97.581	0	5	0	0	0	0	0	0	0	0	0	0	0	0	0	0	0	0	0	0	0	0	0	0	0	0	0	0	0	0	0	0	0	0	0	0	0	0	0	0	0	0	0	0	0	0	0	0	0
OTU_97.608	0	0	0	0	0	0	0	0	0	0	0	0	0	0	0	0	0	0	0	0	0	0	0	0	0	0	0	0	0	0	0	0	0	0	0	0	0	0	0	0	0	0	0	0	0	0	0	0	0
OTU_97.615	0	0	0	0	0	0	0	0	0	0	0	0	0	0	0	0	0	0	0	0	0	0	0	0	0	0	0	0	0	0	0	0	0	0	0	0	0	0	0	0	0	0	0	0	0	0	0	0	0
OTU_97.648	0	0	0	0	0	0	0	0	0	0	0	0	0	0	0	0	0	0	0	0	0	0	0	0	0	0	0	0	0	0	0	0	0	0	0	0	0	0	0	0	0	0	0	0	0	0	0	0	0
OTU_97.654	0	0	0	0	0	0	0	0	0	0	0	0	0	0	0	0	0	0	0	0	0	0	0	0	0	0	0	0	0	0	0	0	0	0	0	0	0	0	0	0	0	0	0	0	0	0	0	0	0
OTU_97.660	0	0	0	0	0	0	0	0	0	0	0	0	0	0	0	0	0	0	0	0	0	0	0	0	0	0	0	0	0	0	0	0	0	0	0	0	0	0	0	1	0	0	0	0	0	0	0	0	0
OTU_97.672	0	0	0	0	0	0	0	0	0	0	0	0	0	0	0	0	0	0	0	0	0	0	0	0	0	0	0	0	0	0	0	0	0	0	0	0	0	0	0	0	0	0	0	0	0	0	0	0	0
OTU_97.676	0	0	0	0	0	0	0	0	0	0	0	0	0	0	0	0	0	0	0	0	0	0	0	0	0	0	0	0	0	0	0	0	0	0	0	0	0	0	0	0	0	0	0	0	0	0	0	0	0
OTU_97.681	0	0	0	0	0	0	0	0	0	0	0	0	0	0	0	0	0	0	0	0	0	0	0	0	0	0	0	0	0	0	0	0	0	0	0	0	0	0	0	0	0	0	0	0	0	0	0	0	0
Potential Plant contaminations
OTU_97.52	0	15	0	0	1	0	0	0	0	0	0	0	0	0	0	0	0	0	0	0	0	0	0	0	0	1	0	0	0	0	0	0	0	0	0	0	0	1	0	0	0	0	0	0	0	0	0	0	0
OTU_97.507	0	2	0	0	0	0	0	0	0	0	0	0	0	0	0	0	0	0	0	0	0	0	0	0	0	0	0	0	0	0	0	0	0	0	0	0	0	0	0	0	0	0	0	0	0	0	0	0	0
OTU_97.377	0	1	0	0	0	0	0	0	0	0	0	0	0	0	0	0	0	0	0	0	0	0	0	0	0	0	0	0	0	0	0	0	0	0	0	0	0	0	0	0	0	0	0	0	0	0	0	0	0
OTU_97.399	0	0	0	0	0	0	0	0	0	0	0	0	0	0	0	0	0	0	0	0	0	0	0	0	0	0	0	0	0	0	0	0	0	0	0	0	0	0	0	0	0	0	0	0	0	0	0	0	0
OTU_97.528	0	0	0	0	0	0	0	0	0	0	0	0	0	0	0	0	0	0	0	0	0	0	0	0	0	0	0	0	0	0	0	0	0	0	0	0	0	0	0	0	0	0	0	0	0	0	0	0	0
Reads per sample	1943	1125	1138	1155	1612	1722	1599	1353	1615	1450	1434	2190	1962	2605	1477	1531	1665	1635	1615	1490	1376	1267	1578	996	1735	1273	2378	1627	1513	1603	2653	1682	1416	1656	1776	2130	1578	1475	1291	1380	2467	3021	1539	1405	1696	1912	1782	1382	1376
Average reads/sample	1616.9
	Absolute reads		% of total reads
OTUs found in >80% of samples	239716		56.1147
OTUs found in > 99.5% of samples (OTU 1 and 578)	44871		10.5038
Total sequence reads	427189		100
Note: The numbers in the table depict absolute sequence reads without adjustment for different sequencing depths.
[truncated: 220 more columns]
